# Supplementary material
Source: MDPI journal article supplement (https://www.mdpi.com/2073-4433/13/2/323)

# Supplementary Materials

for

## PCA-MRM model to forecast TEC at middle latitudes

by

Anna L. Morozova <sup>1,\*</sup>, Teresa Barata <sup>2</sup> and Tatiana Barlyaeva <sup>3</sup>

<sup>1</sup> Instituto de Astrofísica e Ciências do Espaço, Univ Coimbra, OGAUC, Coimbra, Portugal; [annamorozovauc@gmail.com](mailto:annamorozovauc@gmail.com)

<sup>2</sup> Instituto de Astrofísica e Ciências do Espaço, Univ Coimbra, OGAUC, Coimbra, Portugal; [mtbarata@gmail.com](mailto:mtbarata@gmail.com)

<sup>3</sup> Instituto de Astrofísica e Ciências do Espaço, Univ Coimbra, OGAUC, Coimbra, Portugal; [tvbarlyaeva@gmail.com](mailto:tvbarlyaeva@gmail.com)

\* Correspondence: [annamorozovauc@gmail.com](mailto:annamorozovauc@gmail.com)

This file contains Supplementary Materials (SM) referenced in the main text:

**Figures S1-S5:** Variations (daily mean values) of space weather parameters used to make the PCA-MRM TEC models for 2015.

**Figure S1.** Variations (daily mean values) of the interplanetary magnetic field parameters used to make the PCA-MRM TEC models for 2015: scalar B (a), Bx (b), By<sub>GSM</sub> (c) and Bz<sub>GSM</sub> (d).

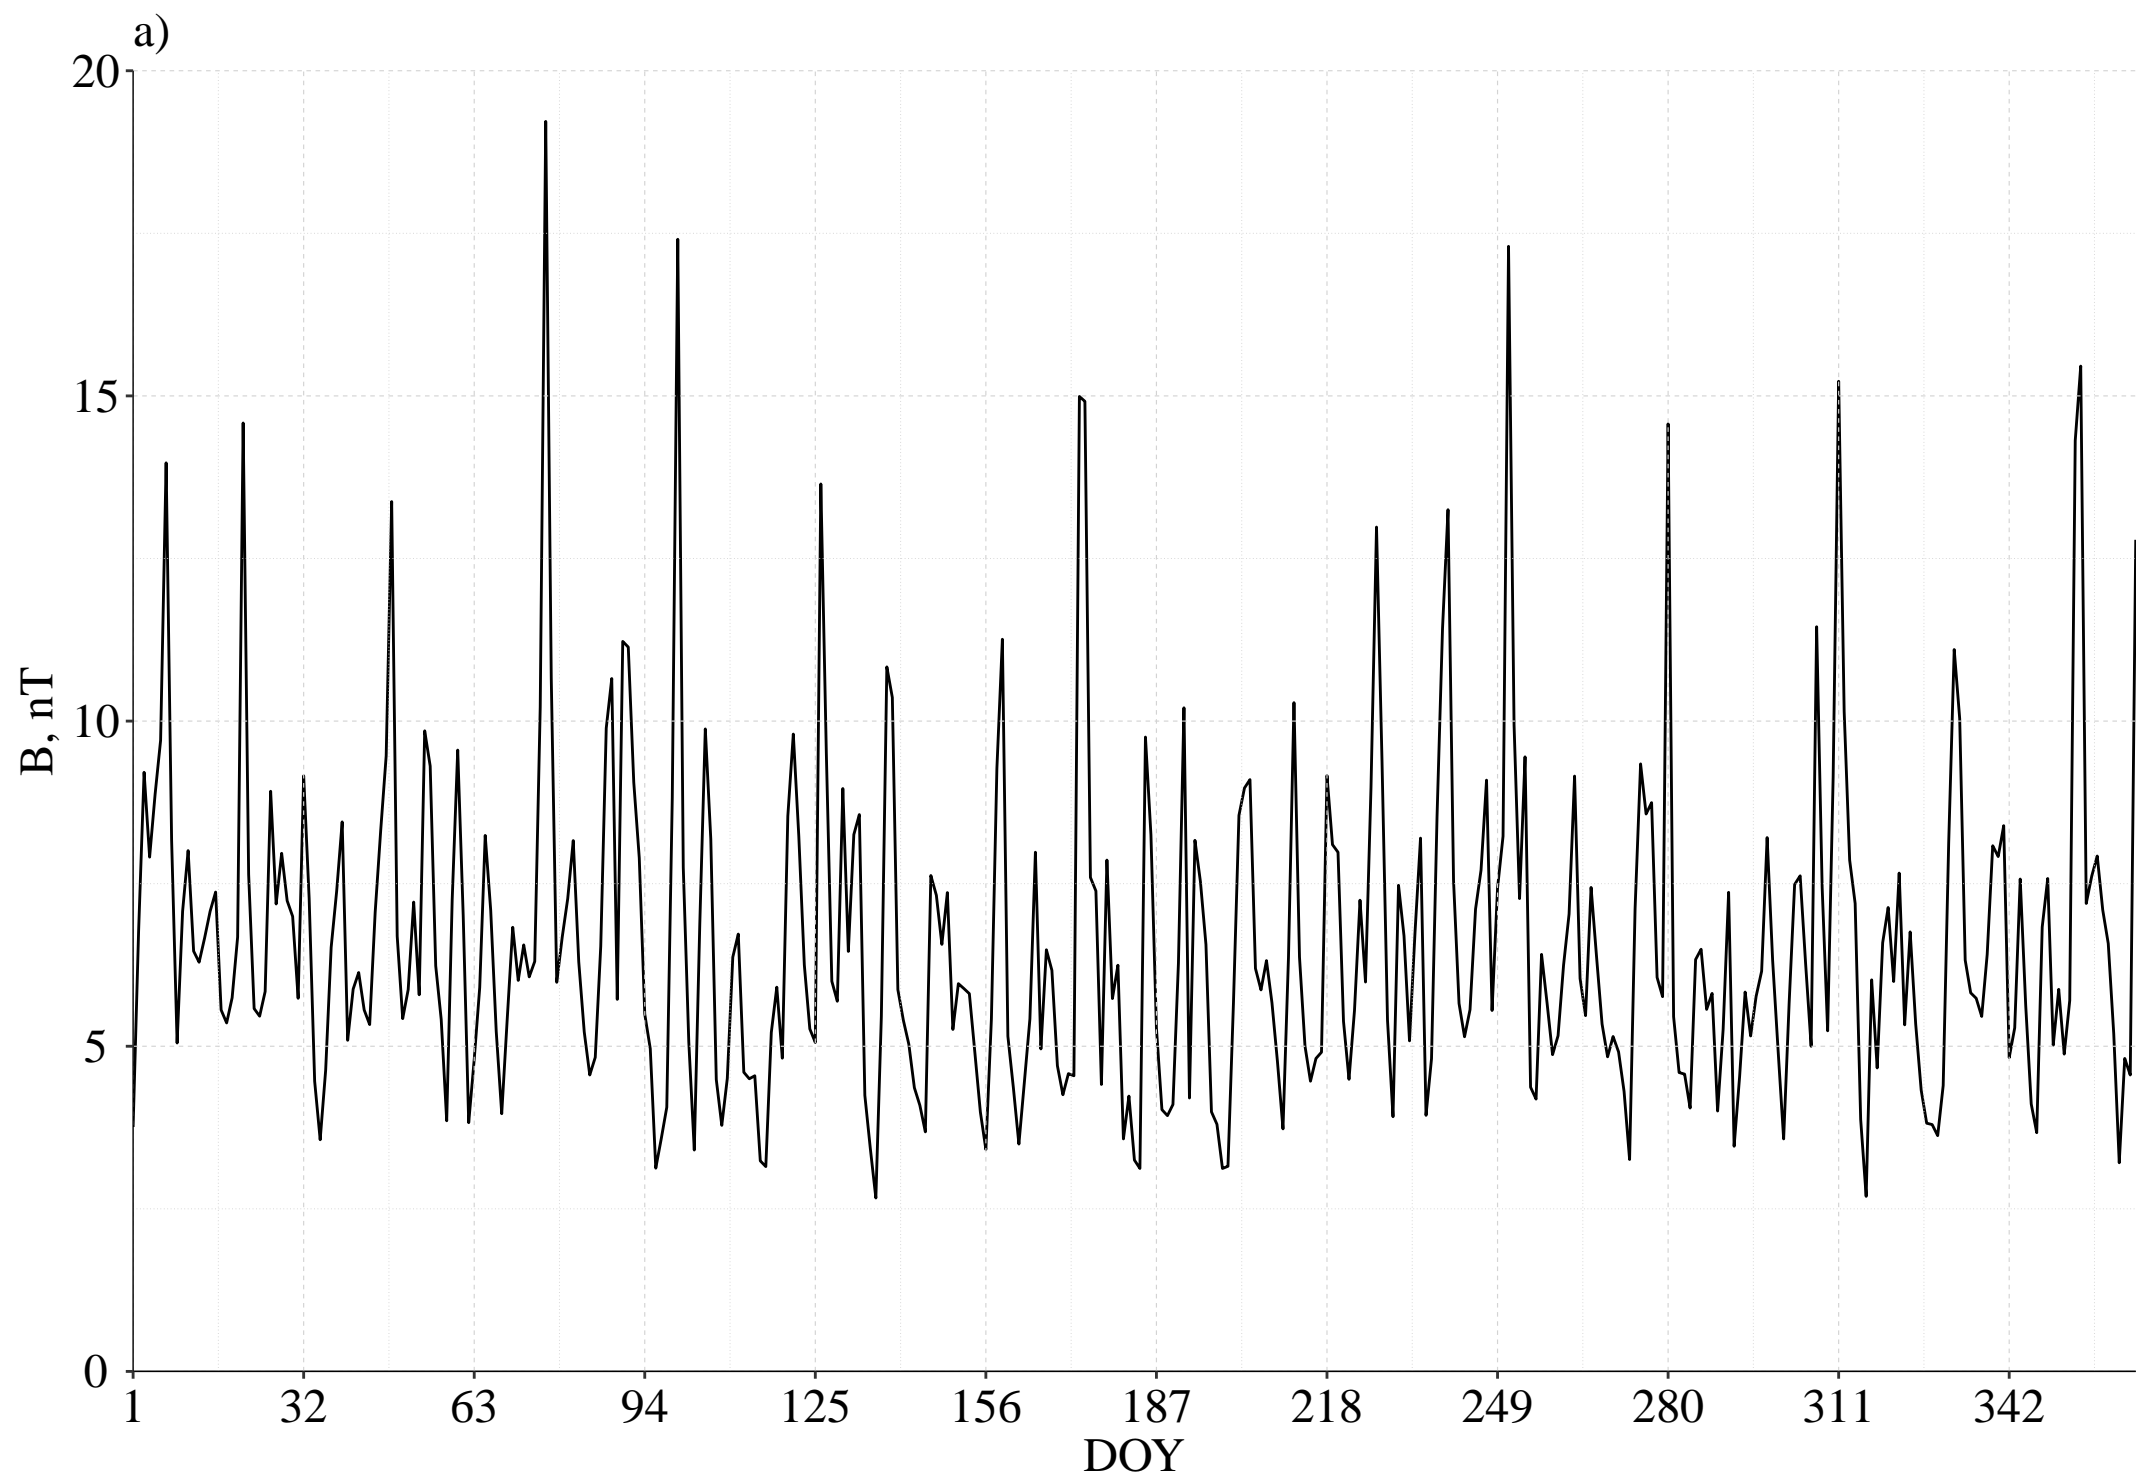

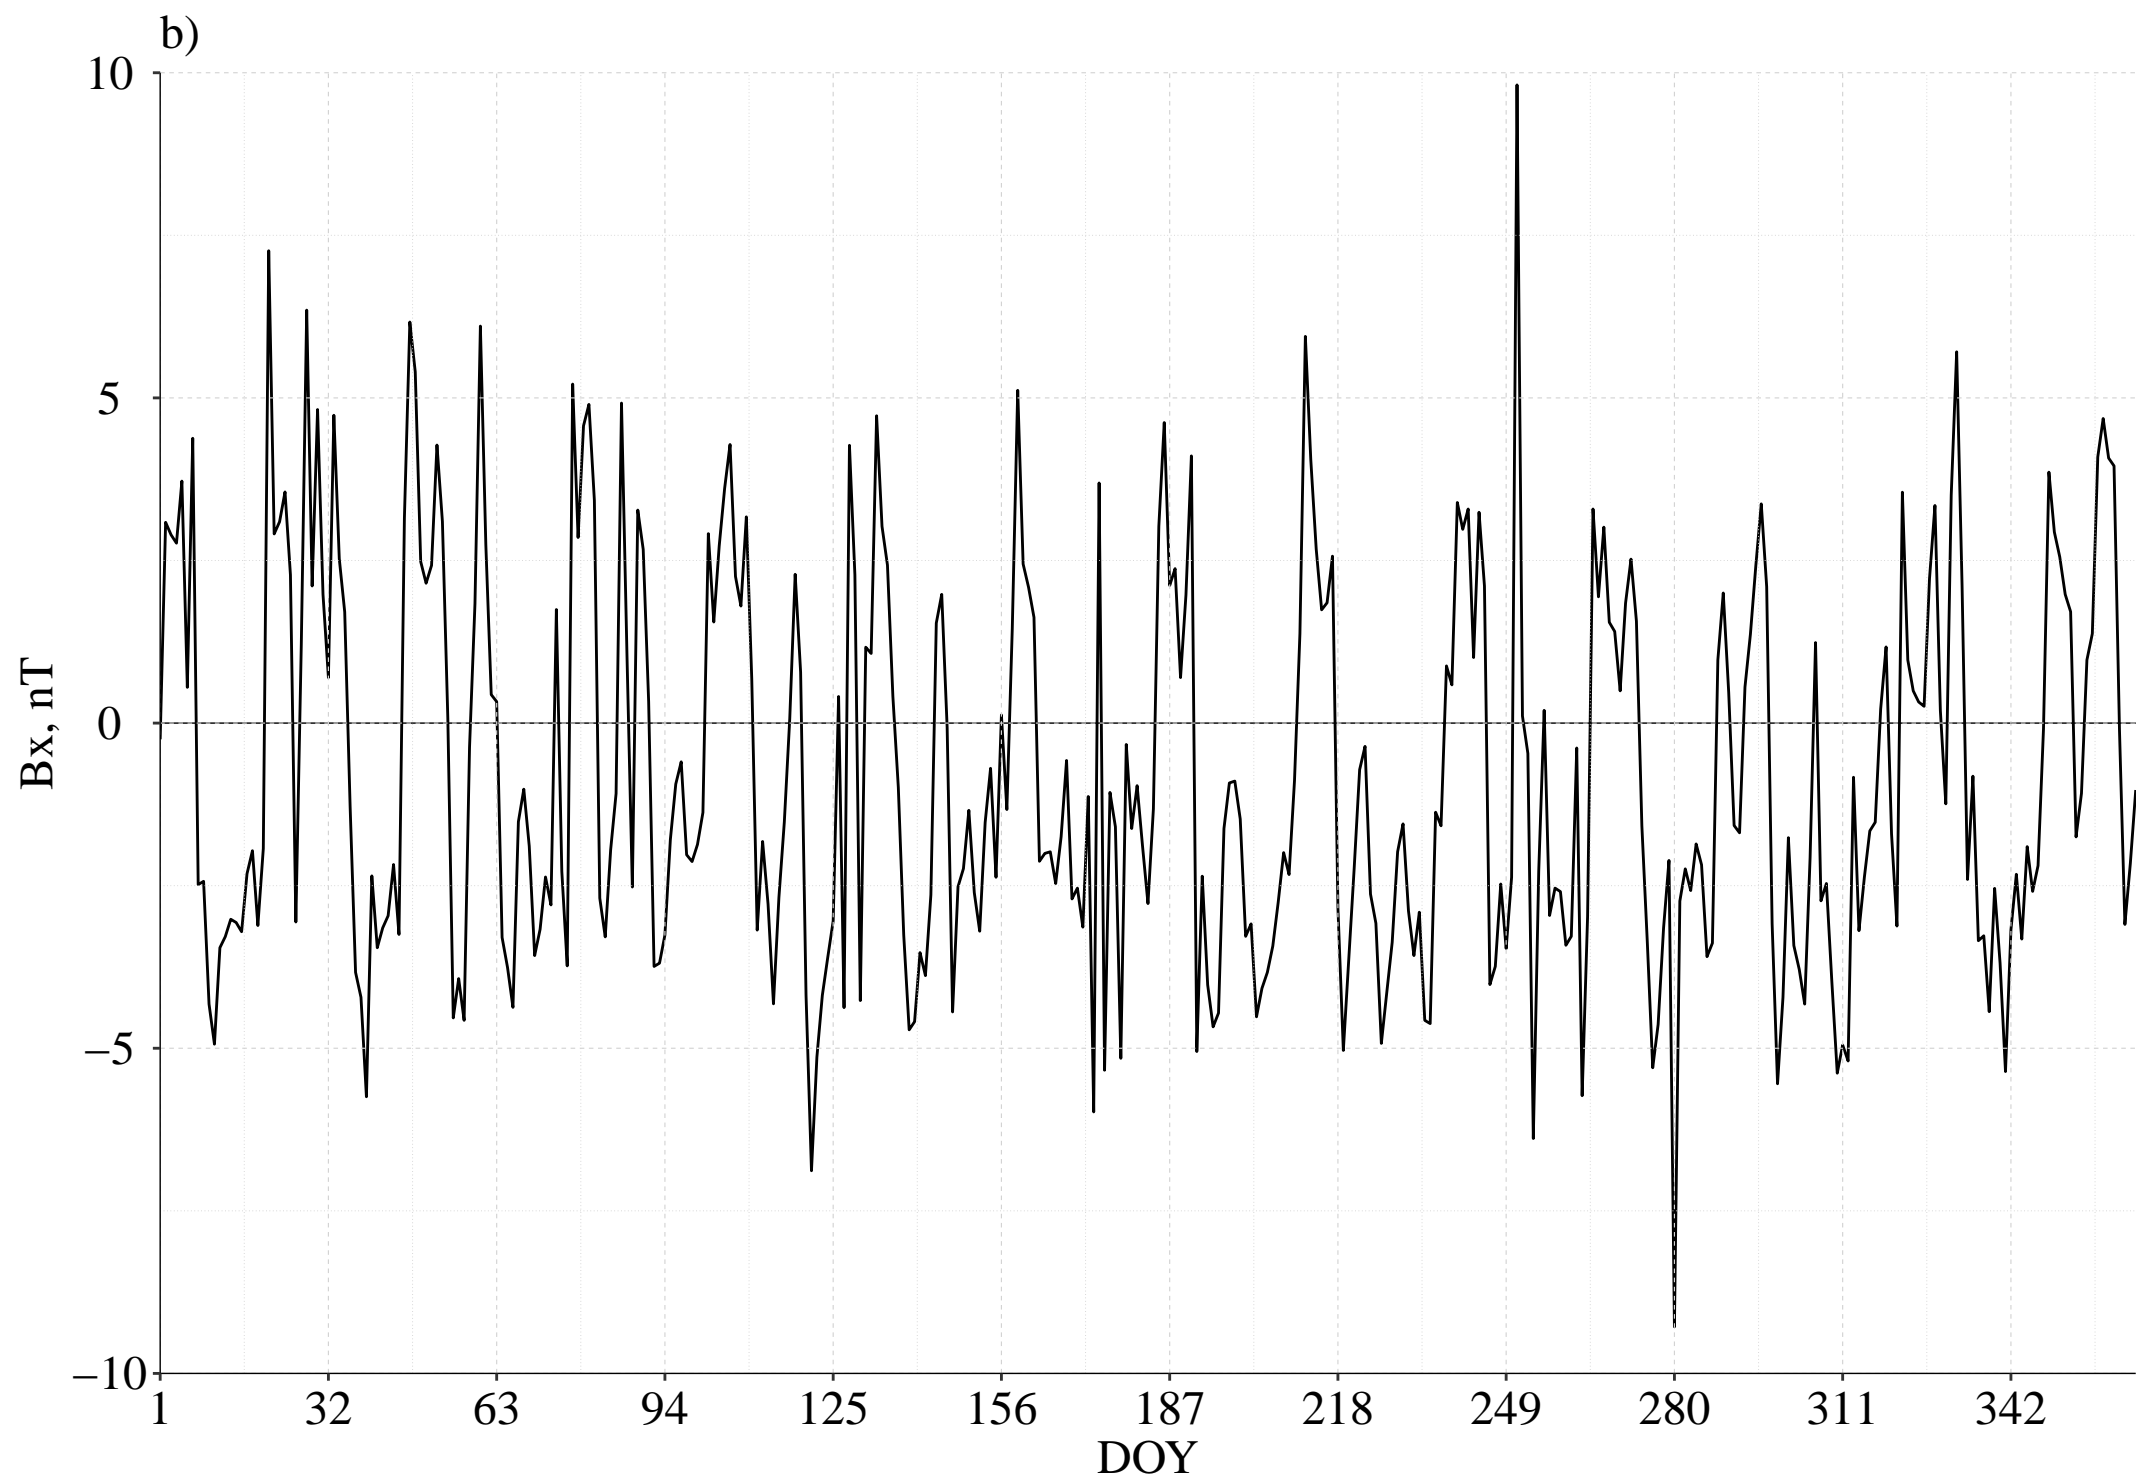

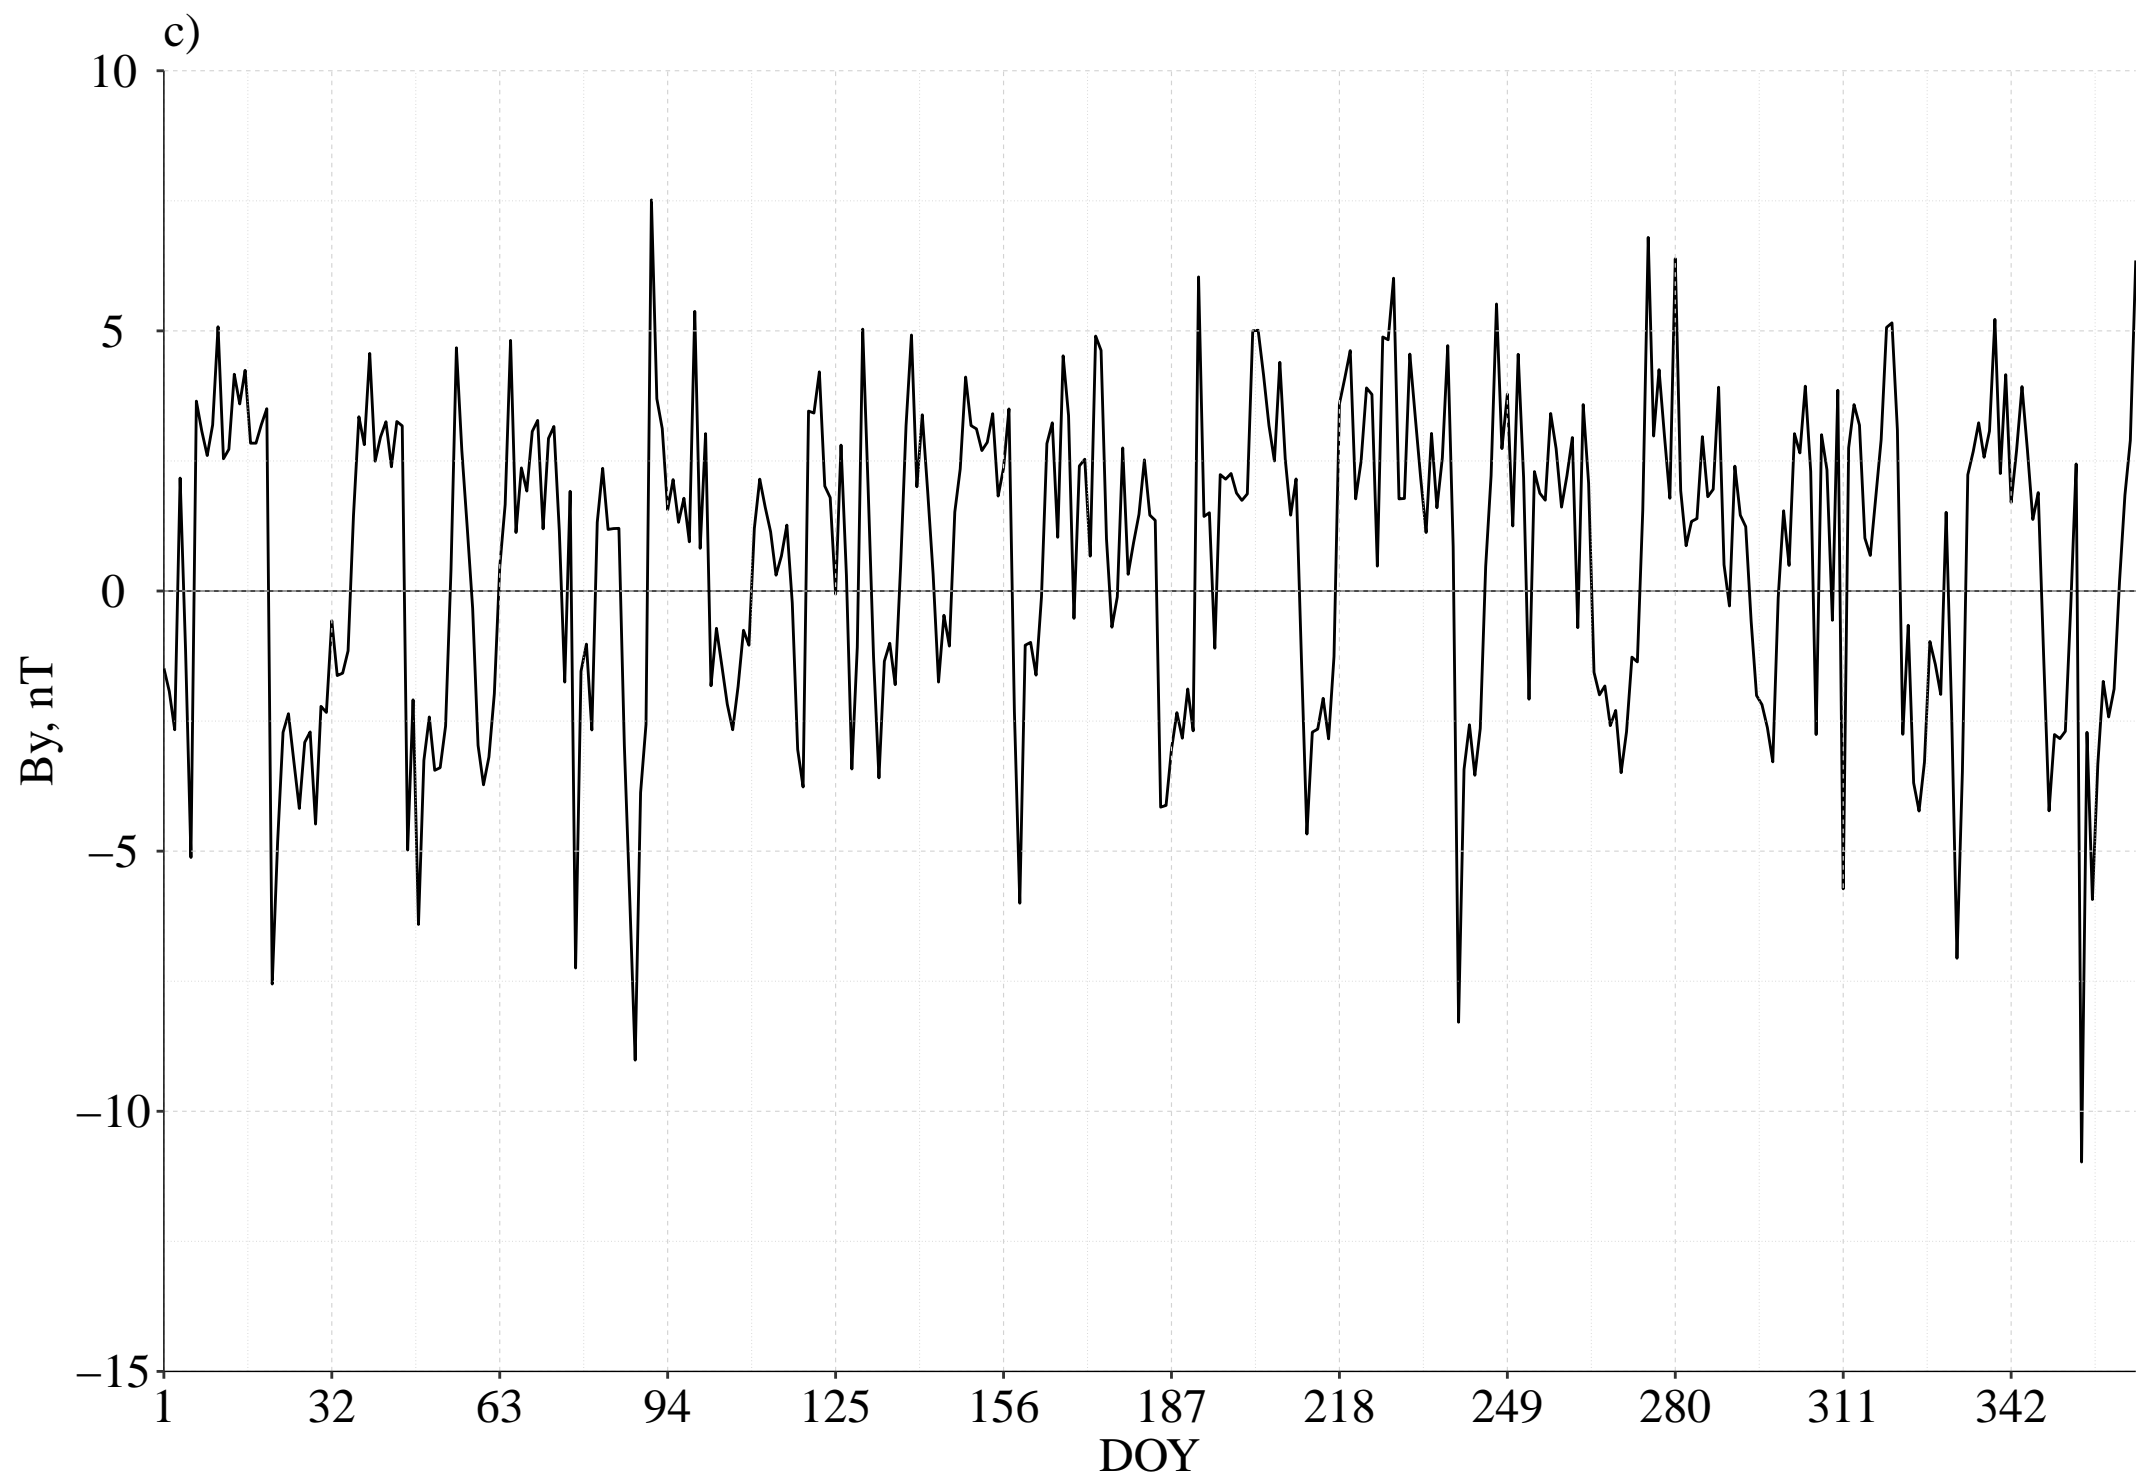

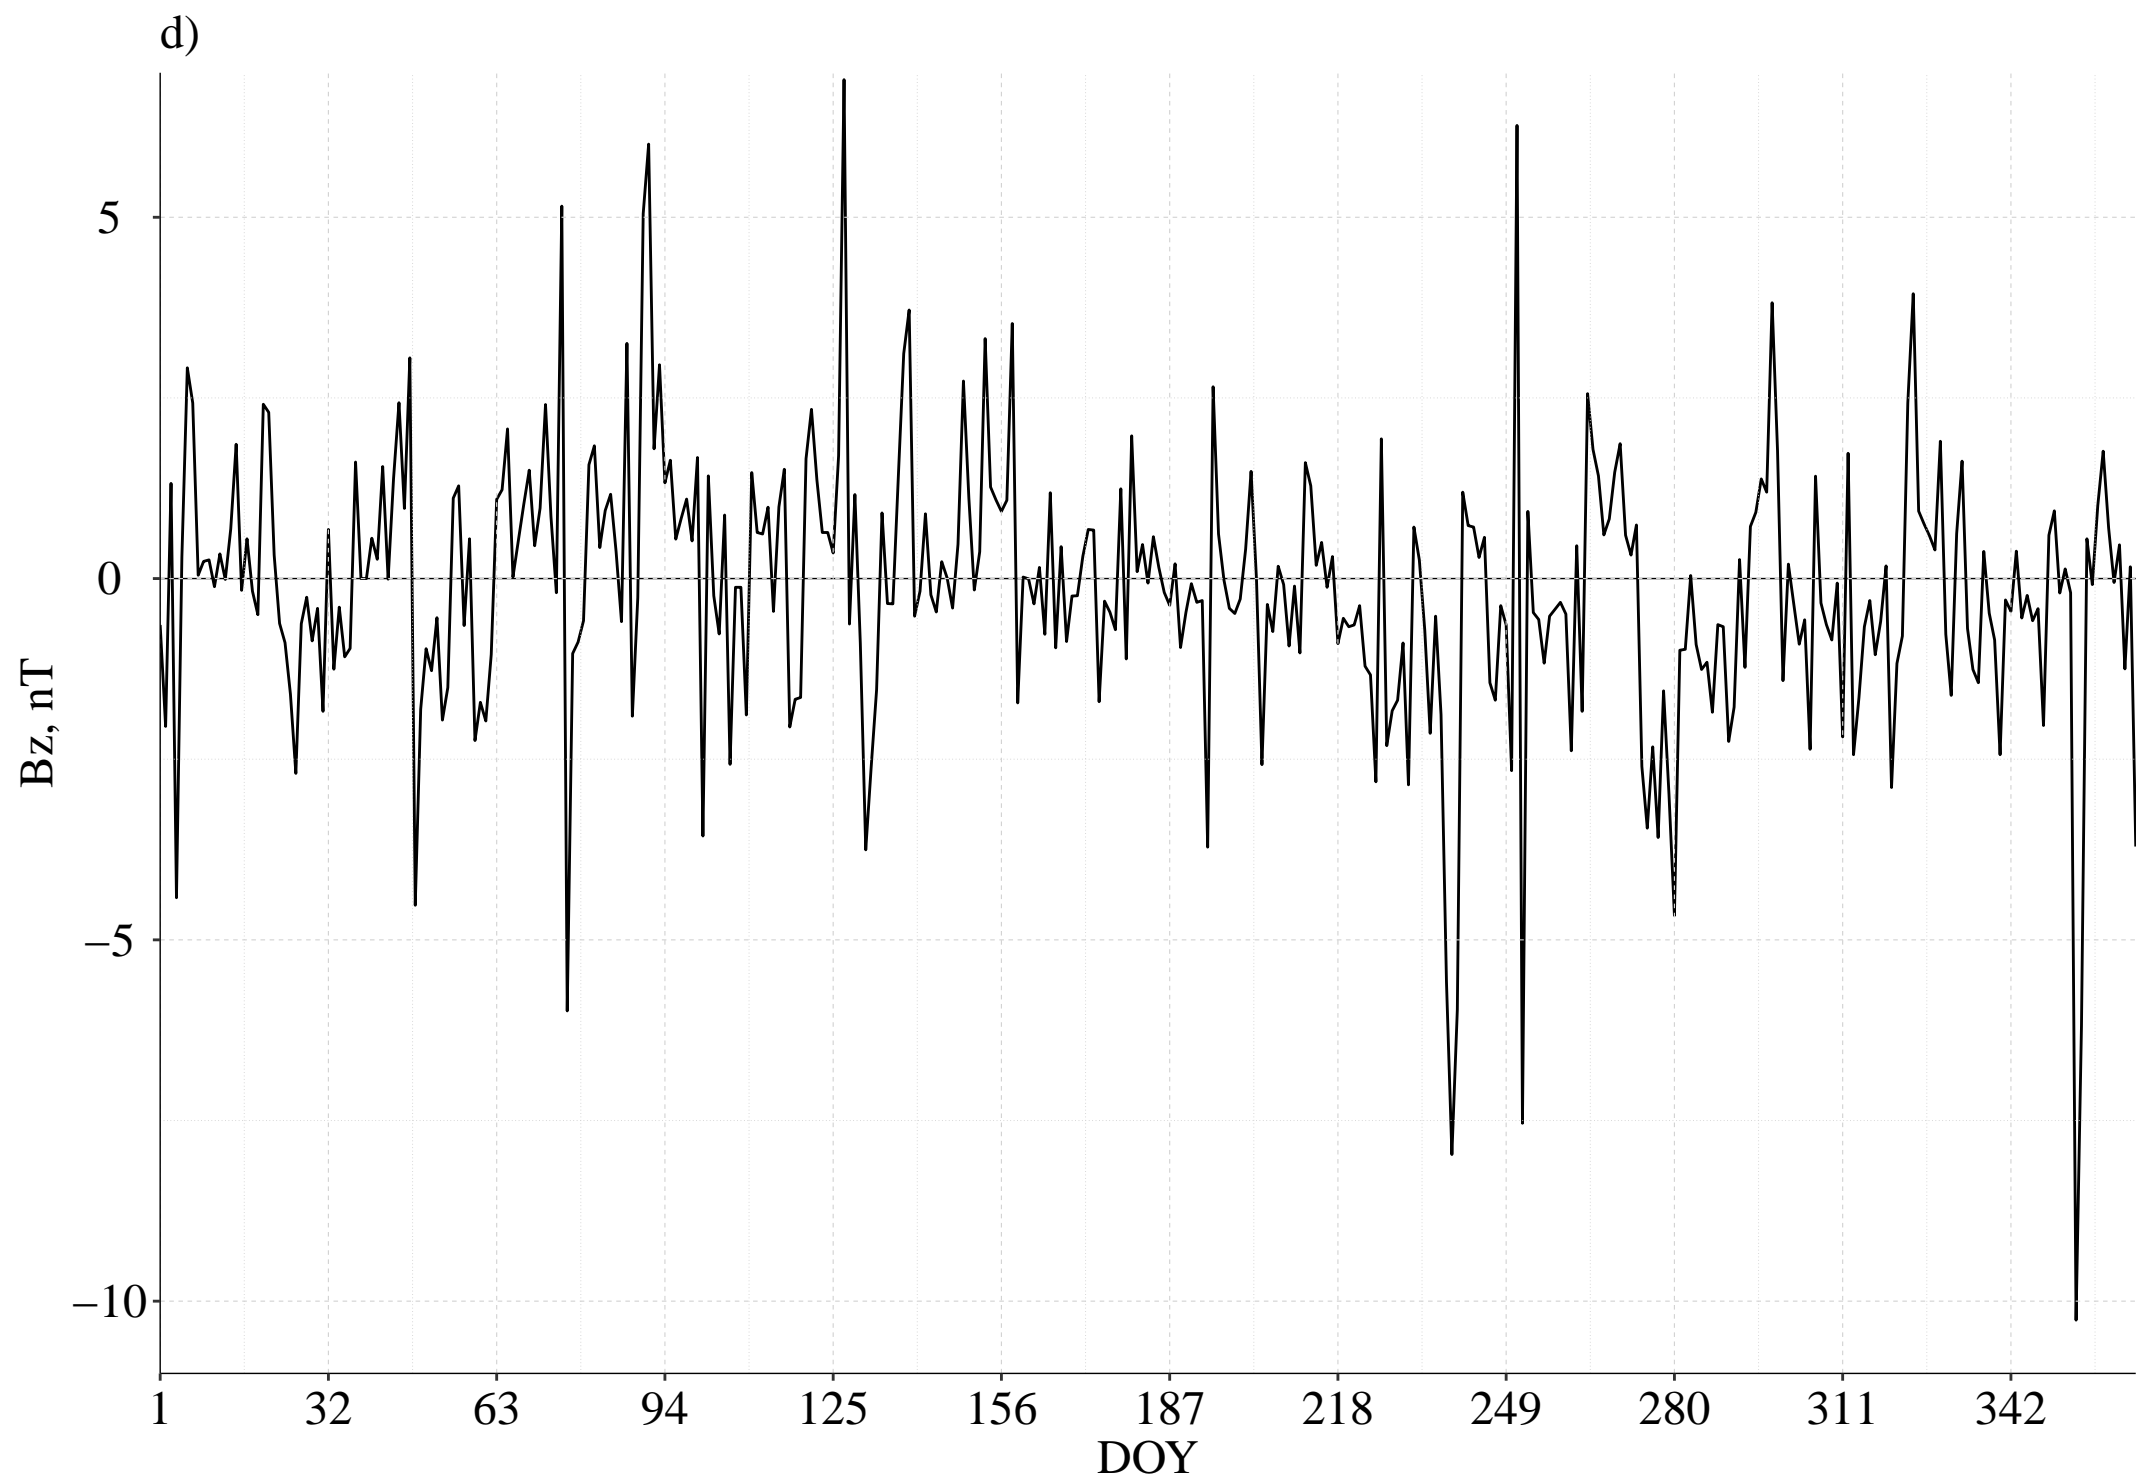

**Figure S2.** Variations (daily mean values) of the solar wins parameters used to make the PCA-MRM TEC models for 2015: n (a), v (b) and p (c).

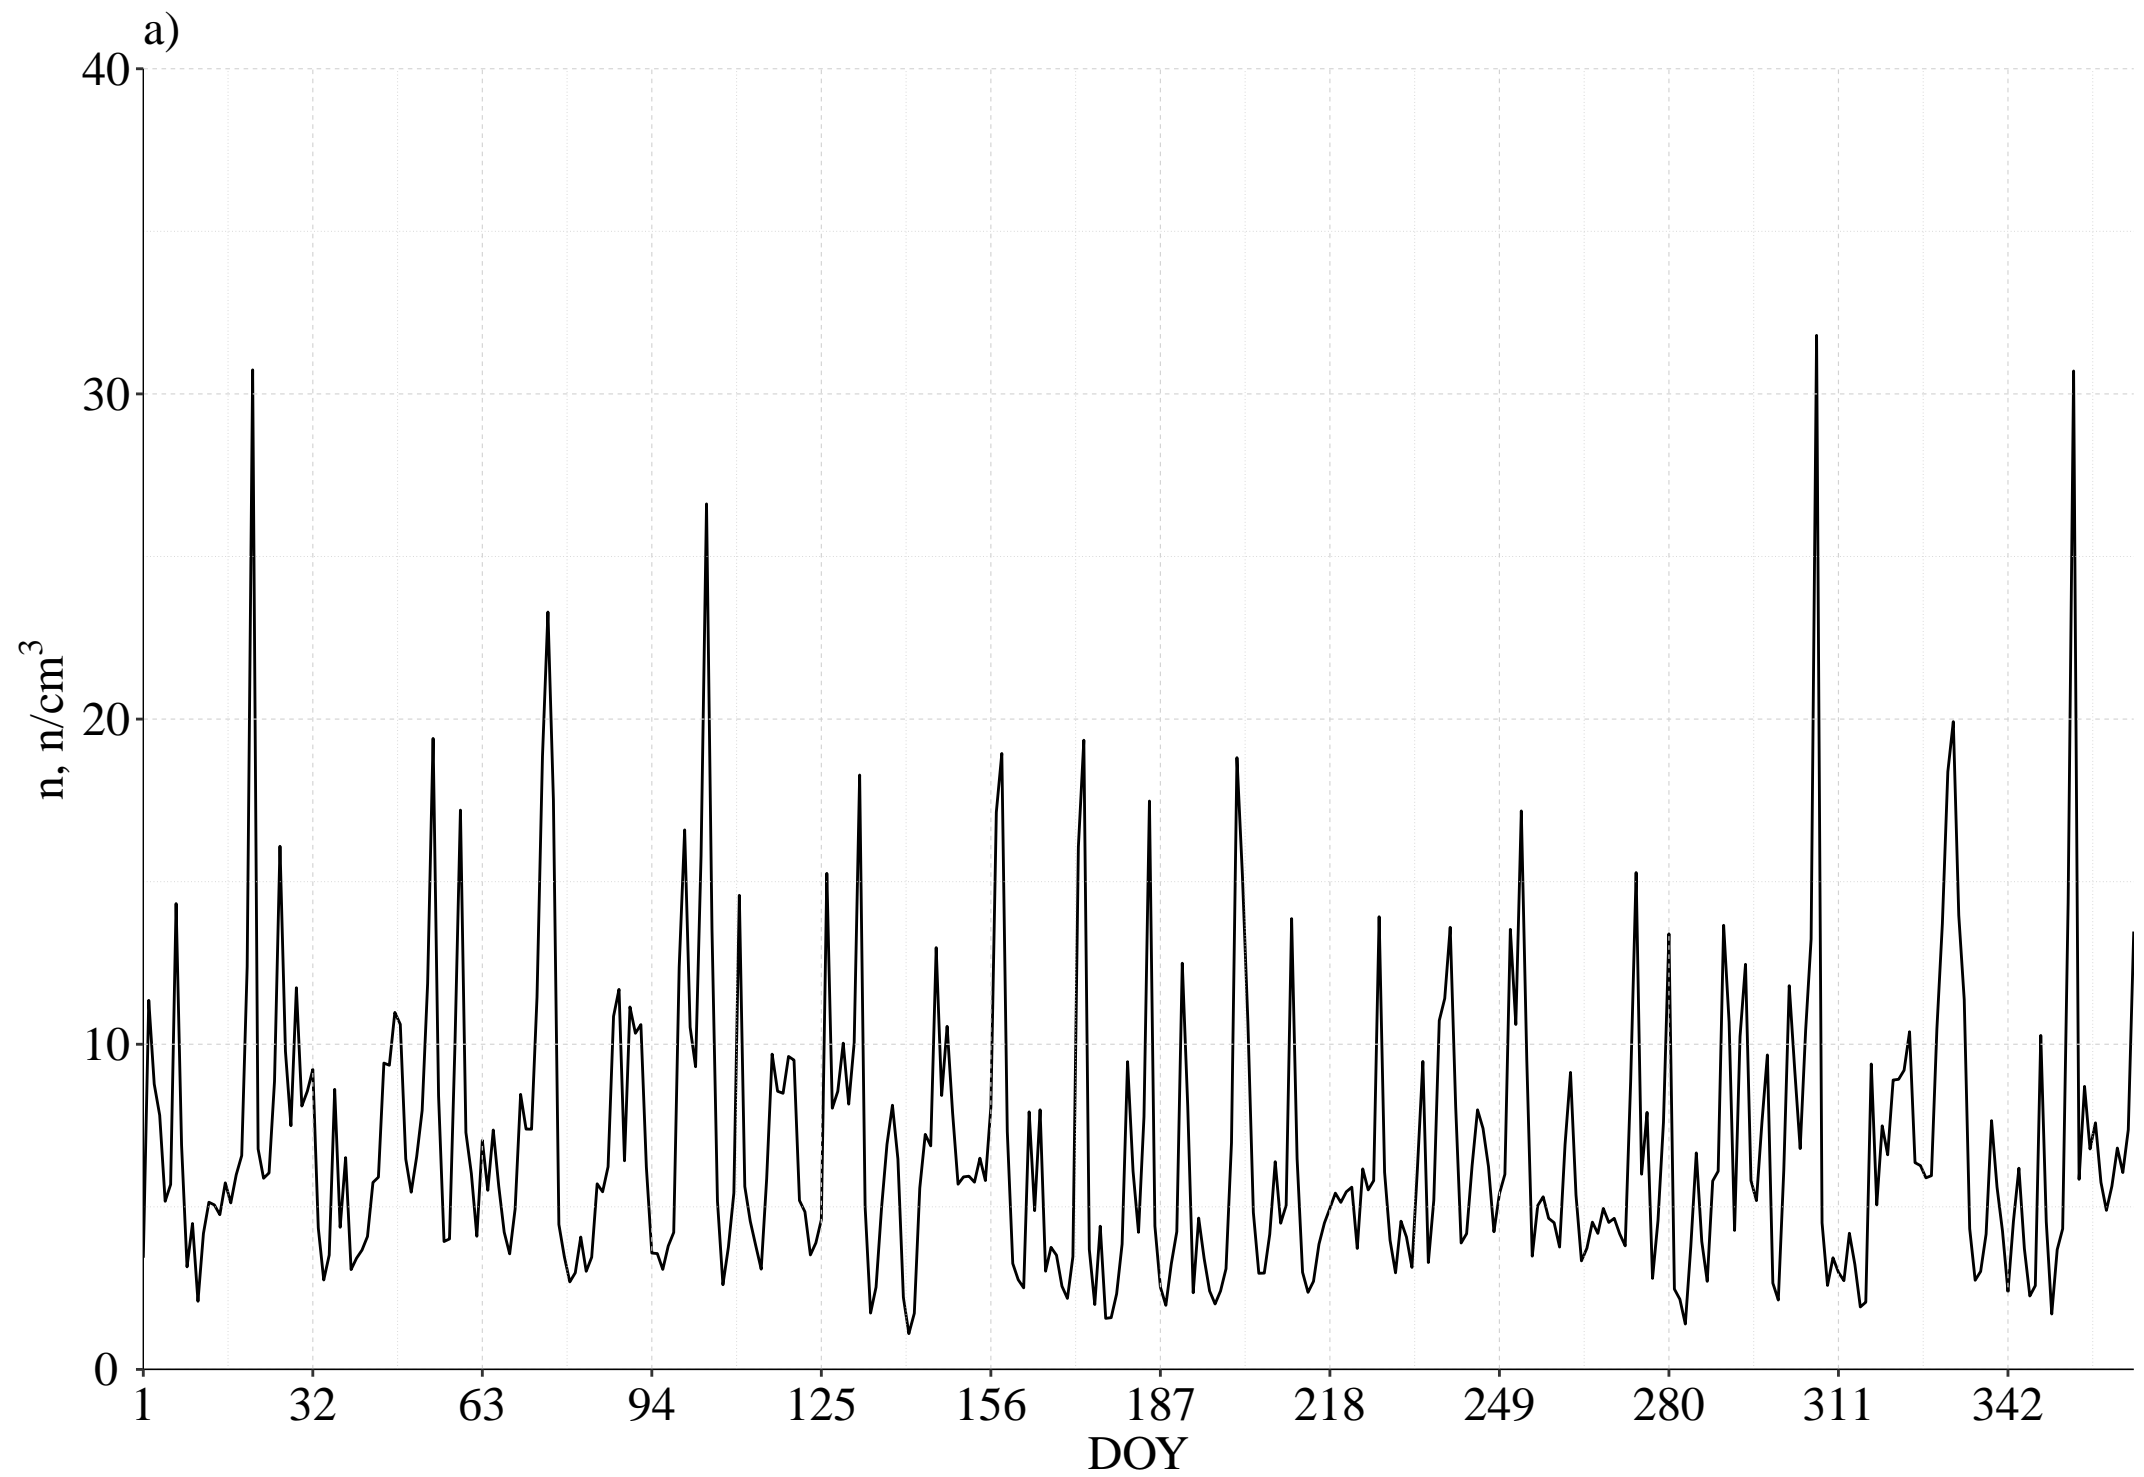

b)

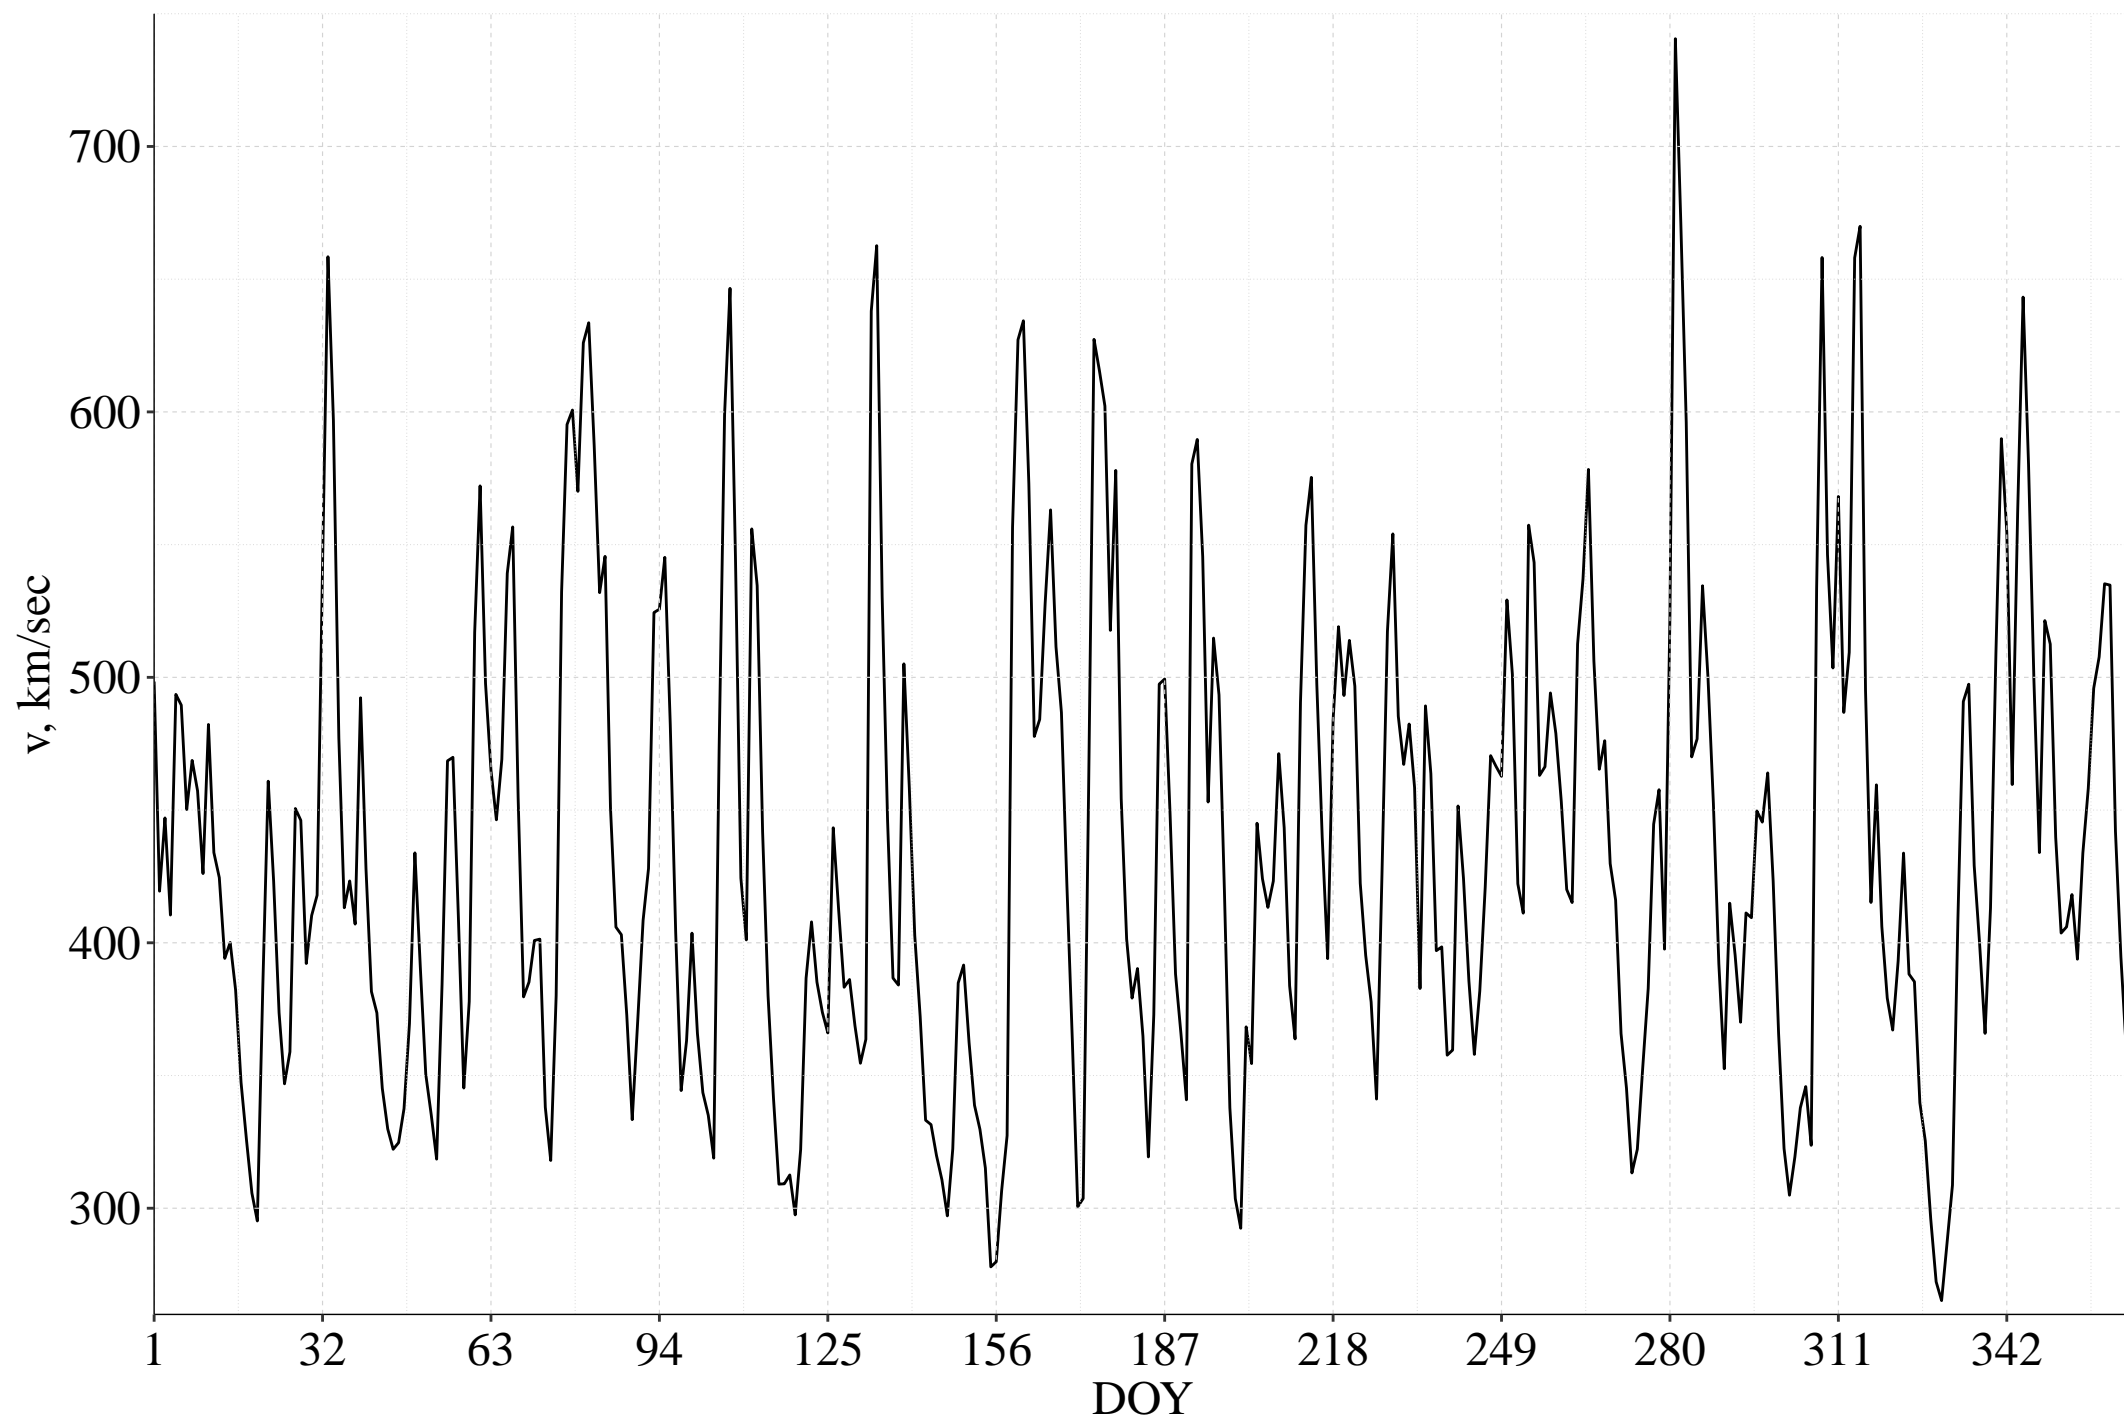

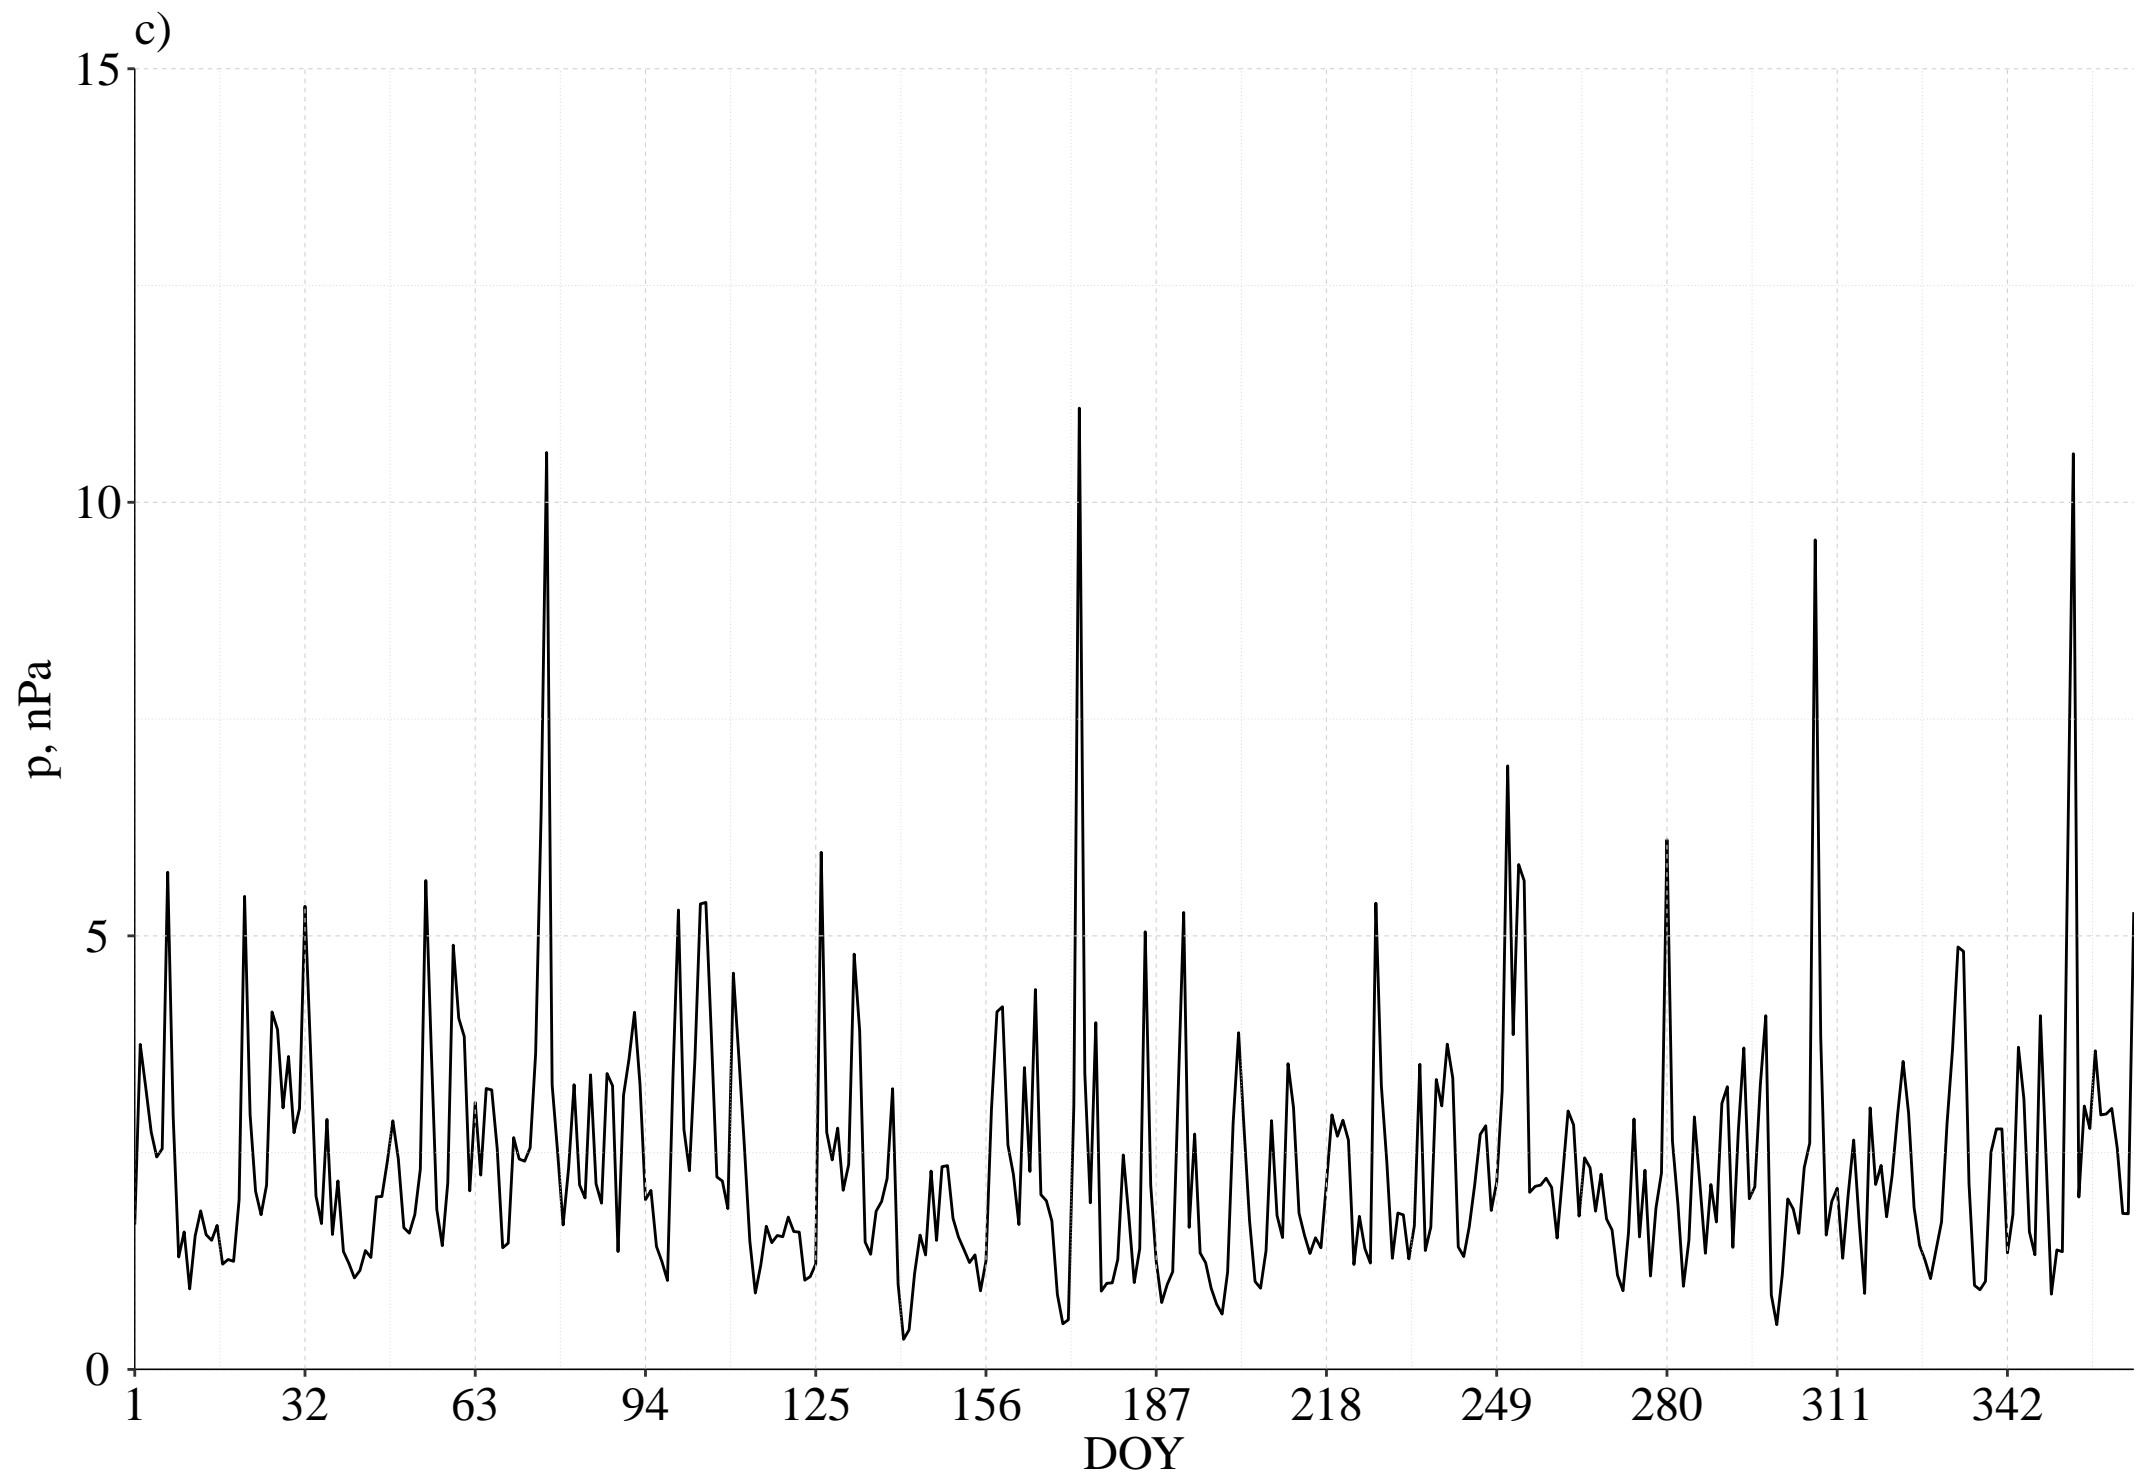

**Figure S3.** Variations (daily mean values) of the geomagnetic indices used to make the PCA-MRM TEC models for 2015: Dst (a), ap (b), AE (c) and  $K_{COI}$  (daily sum, b).

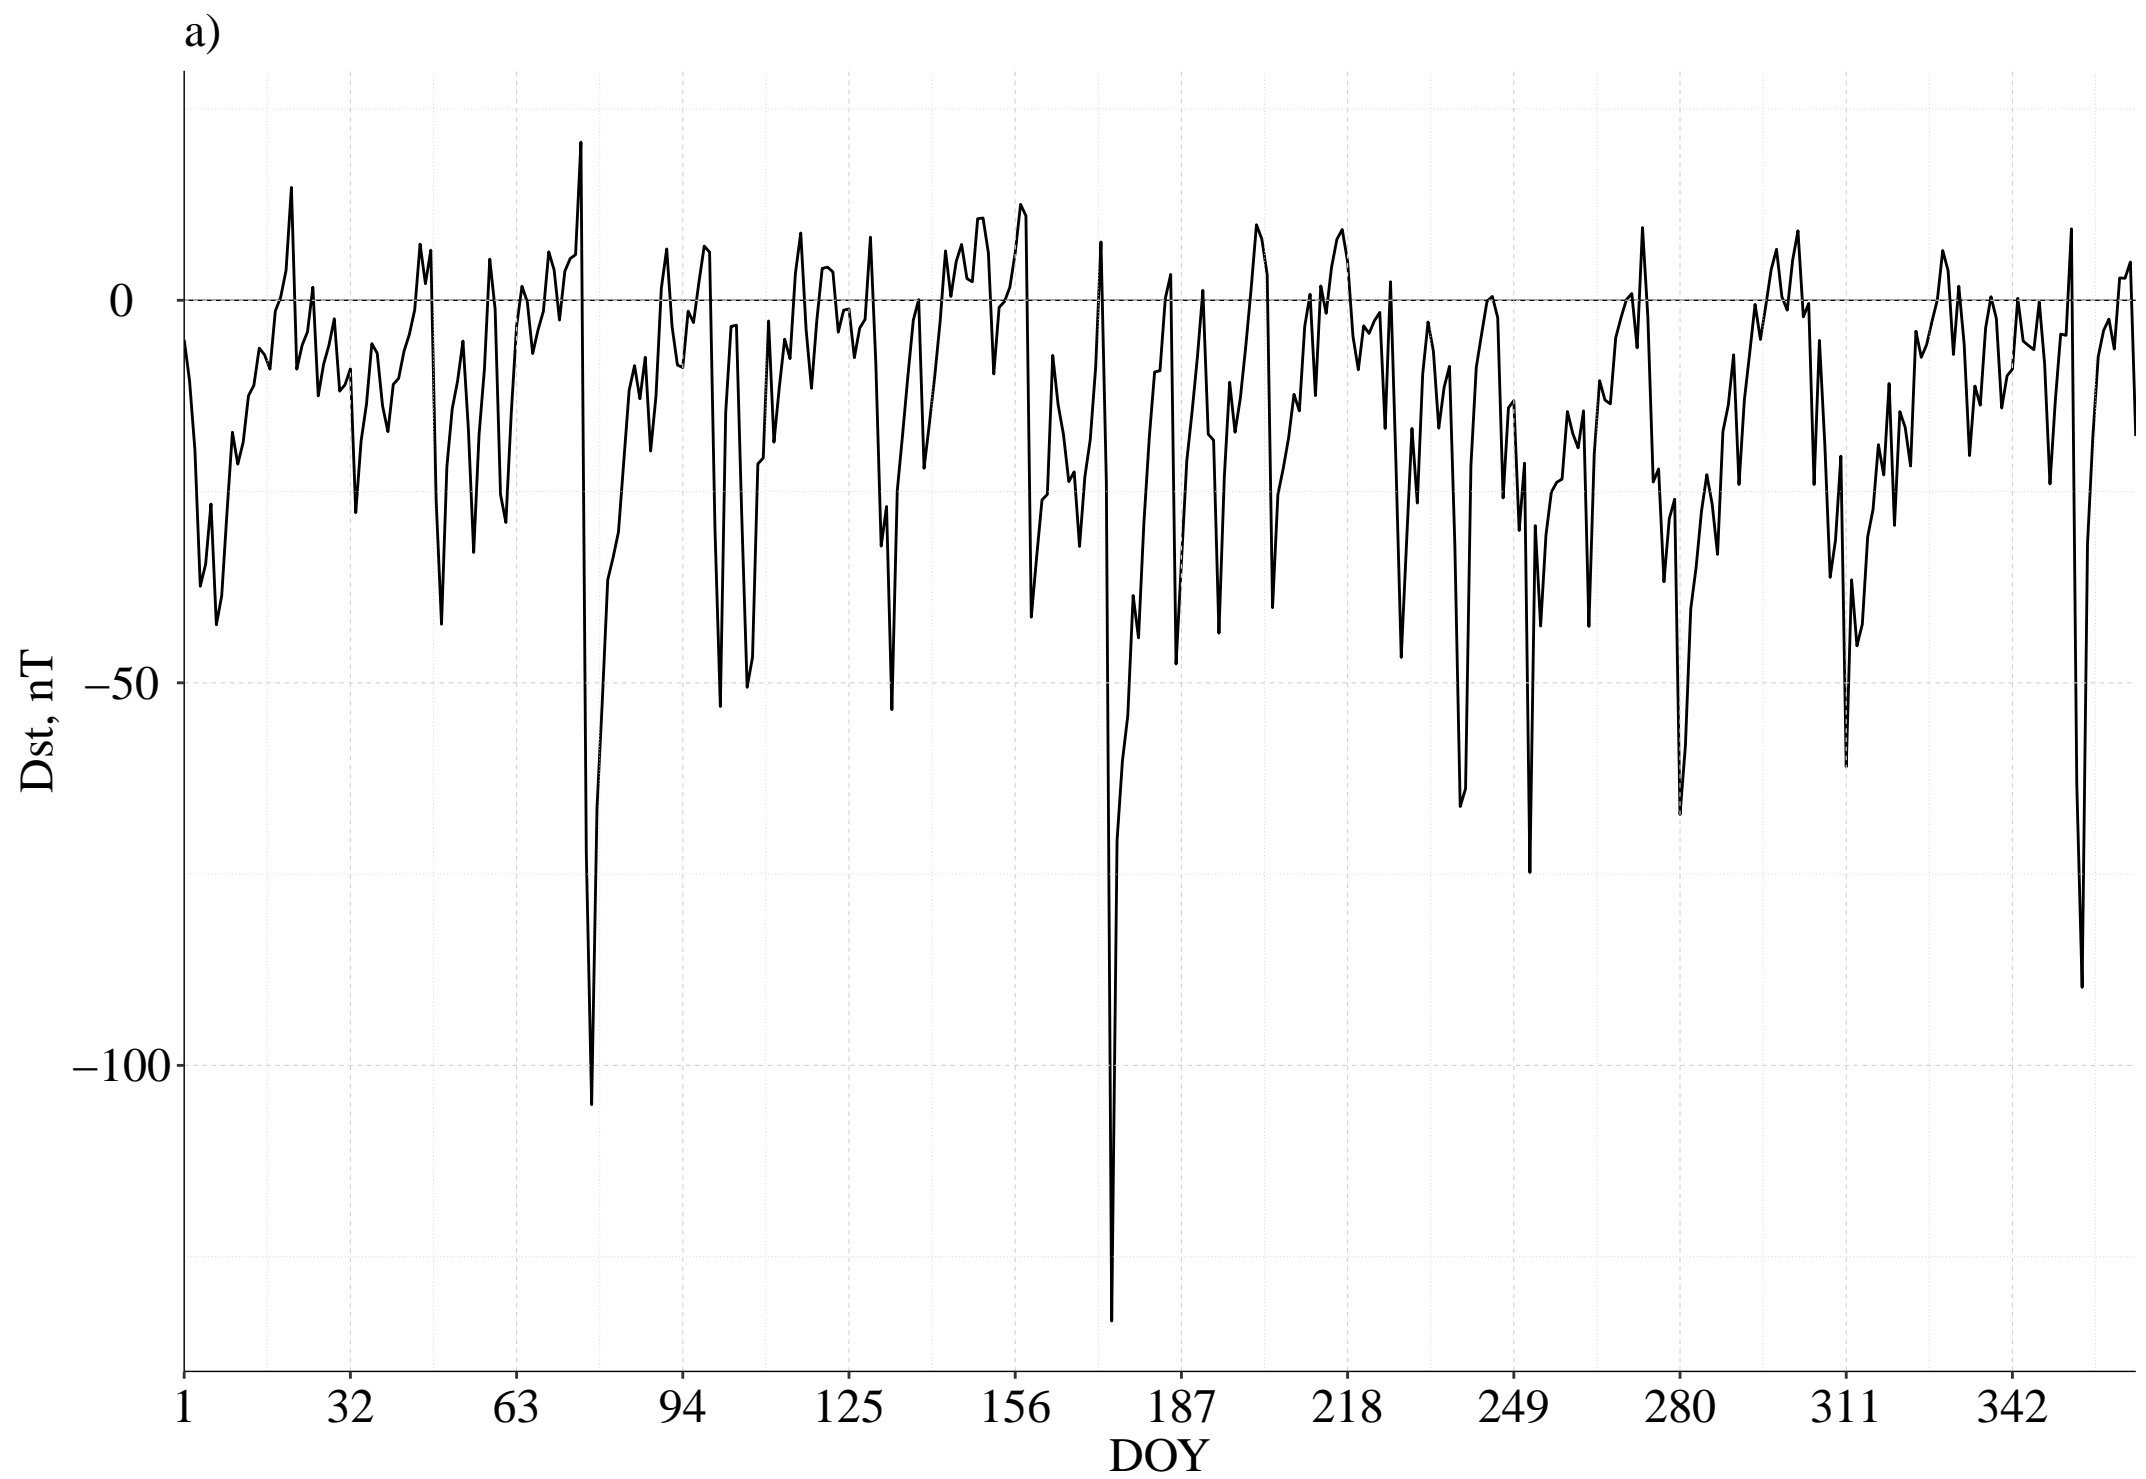

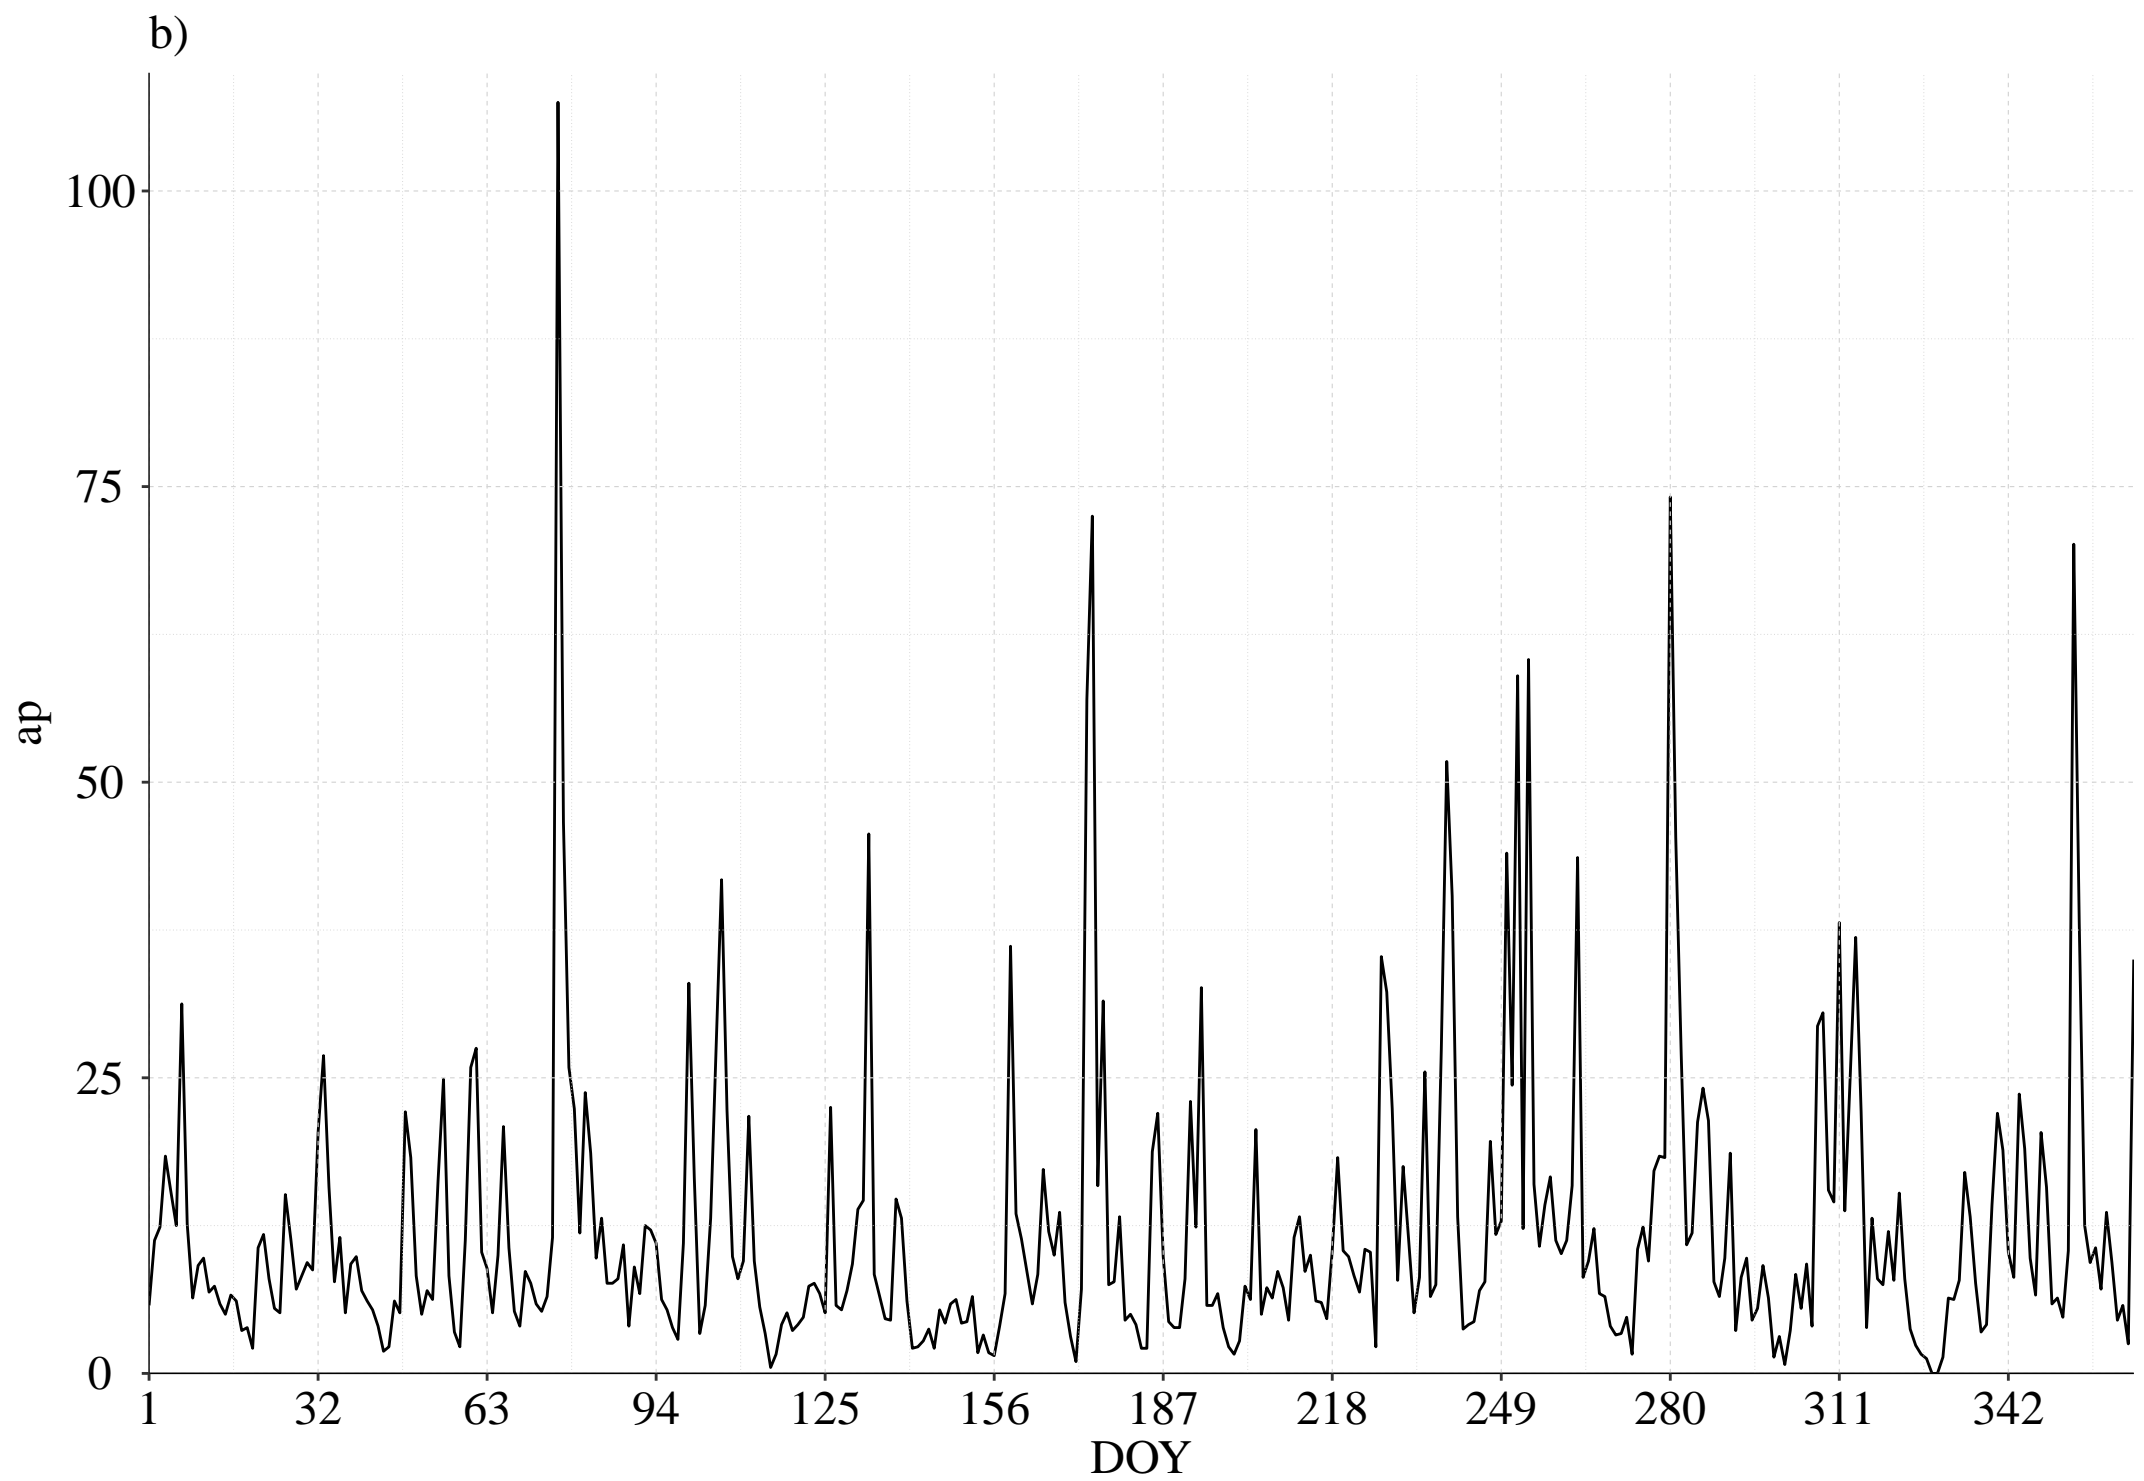

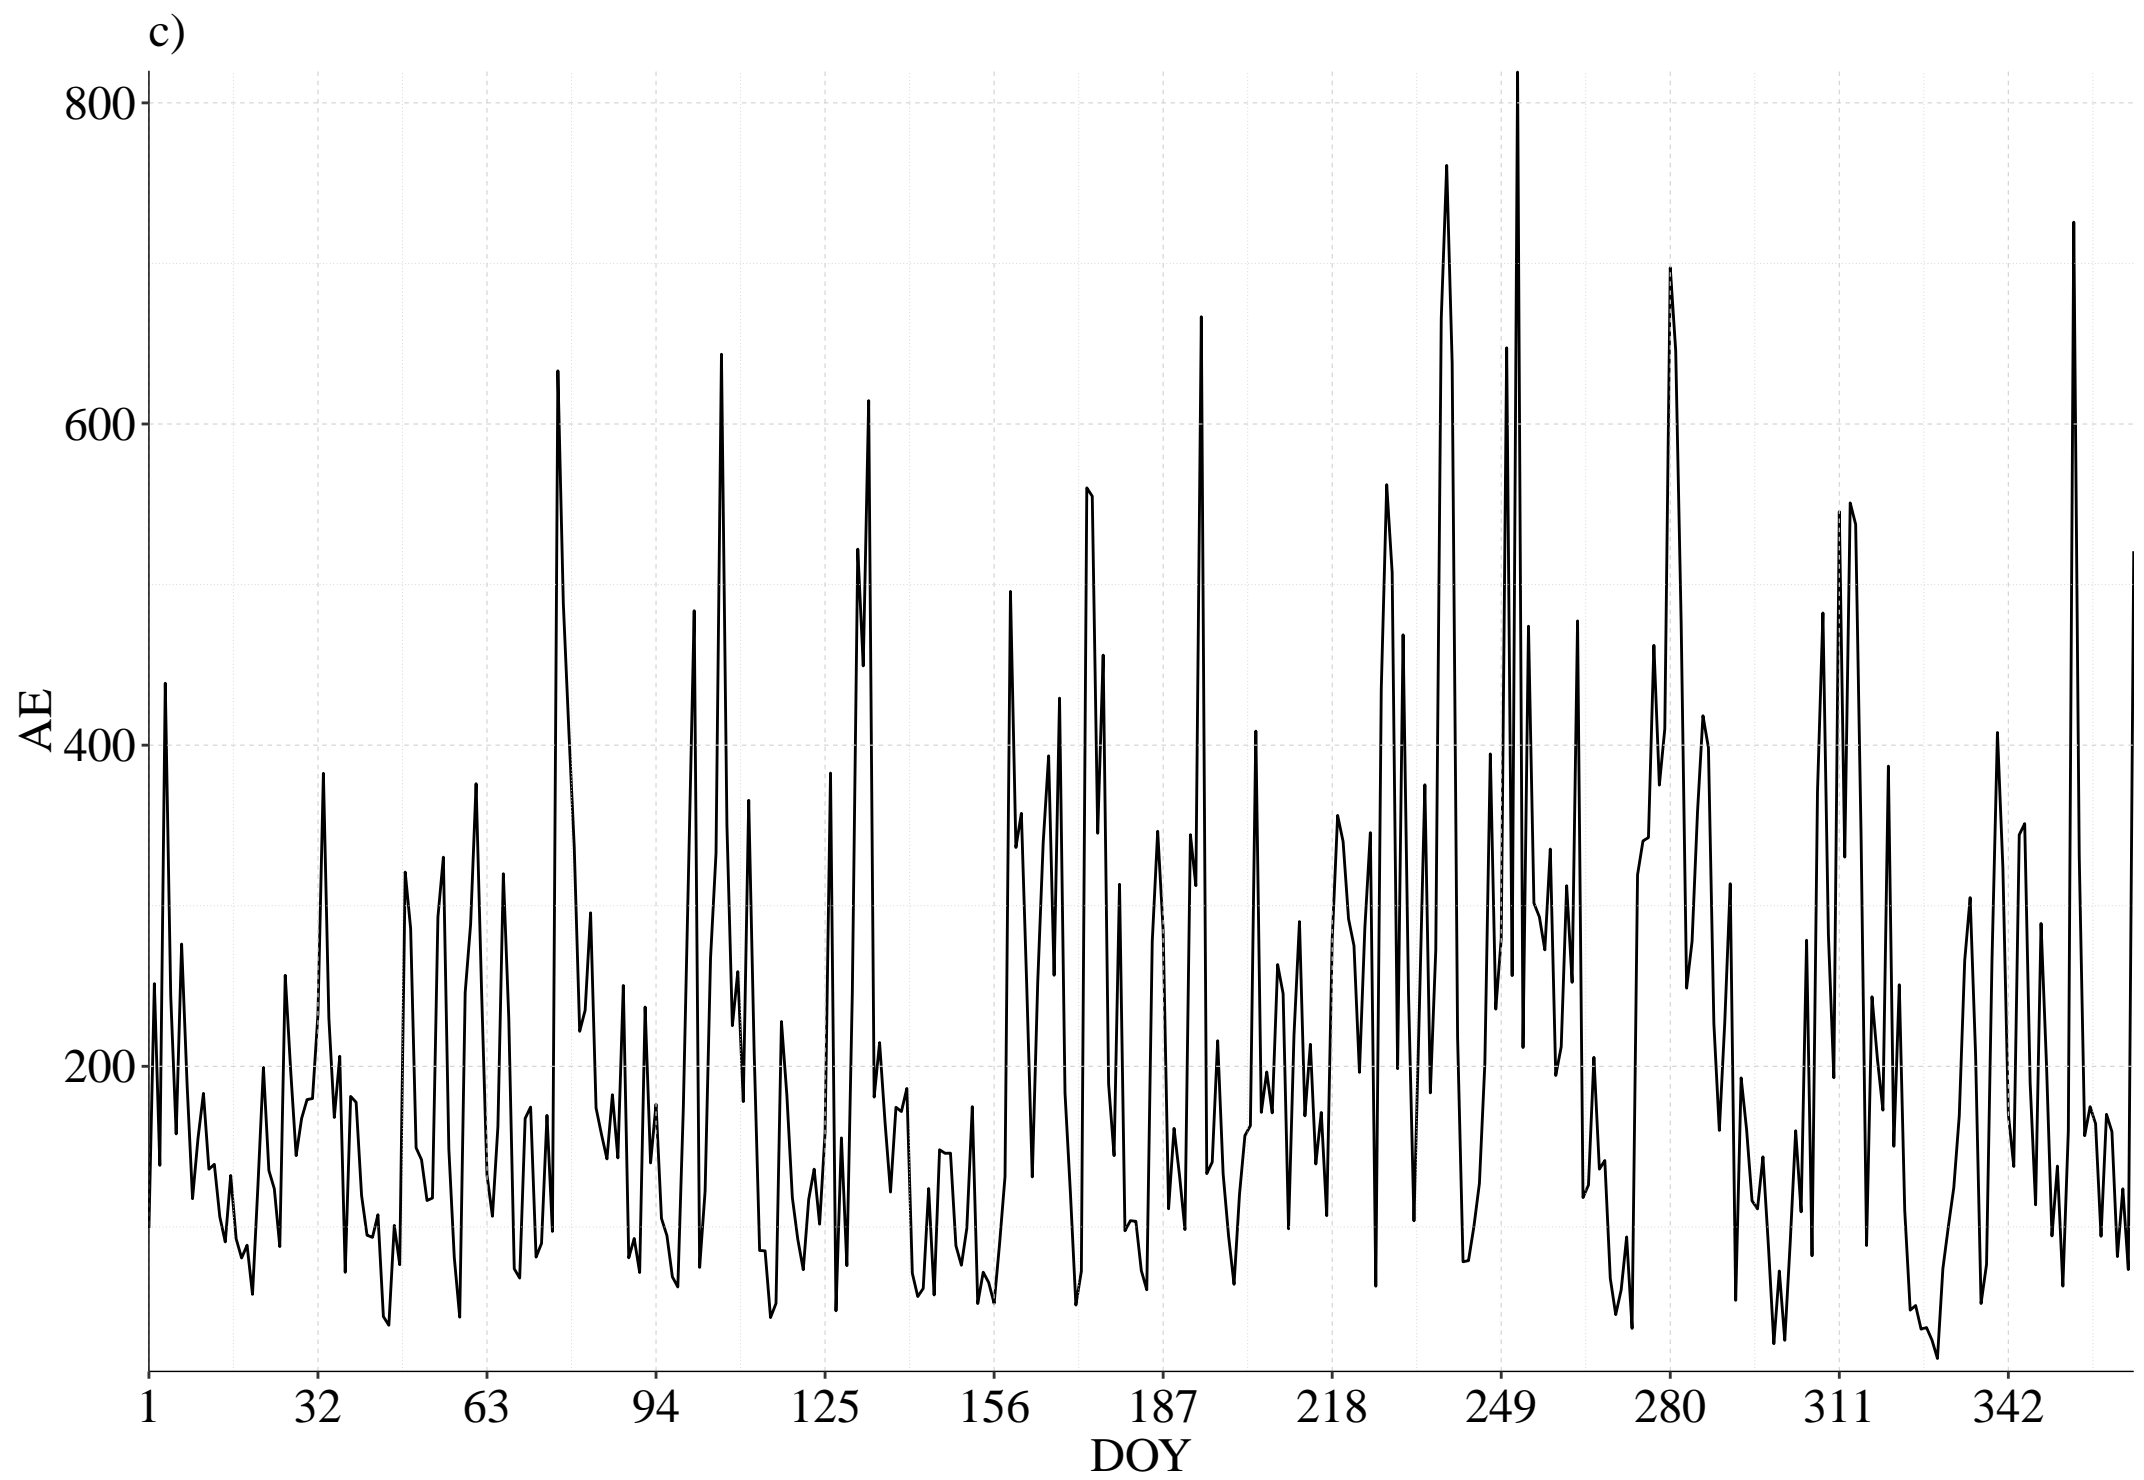

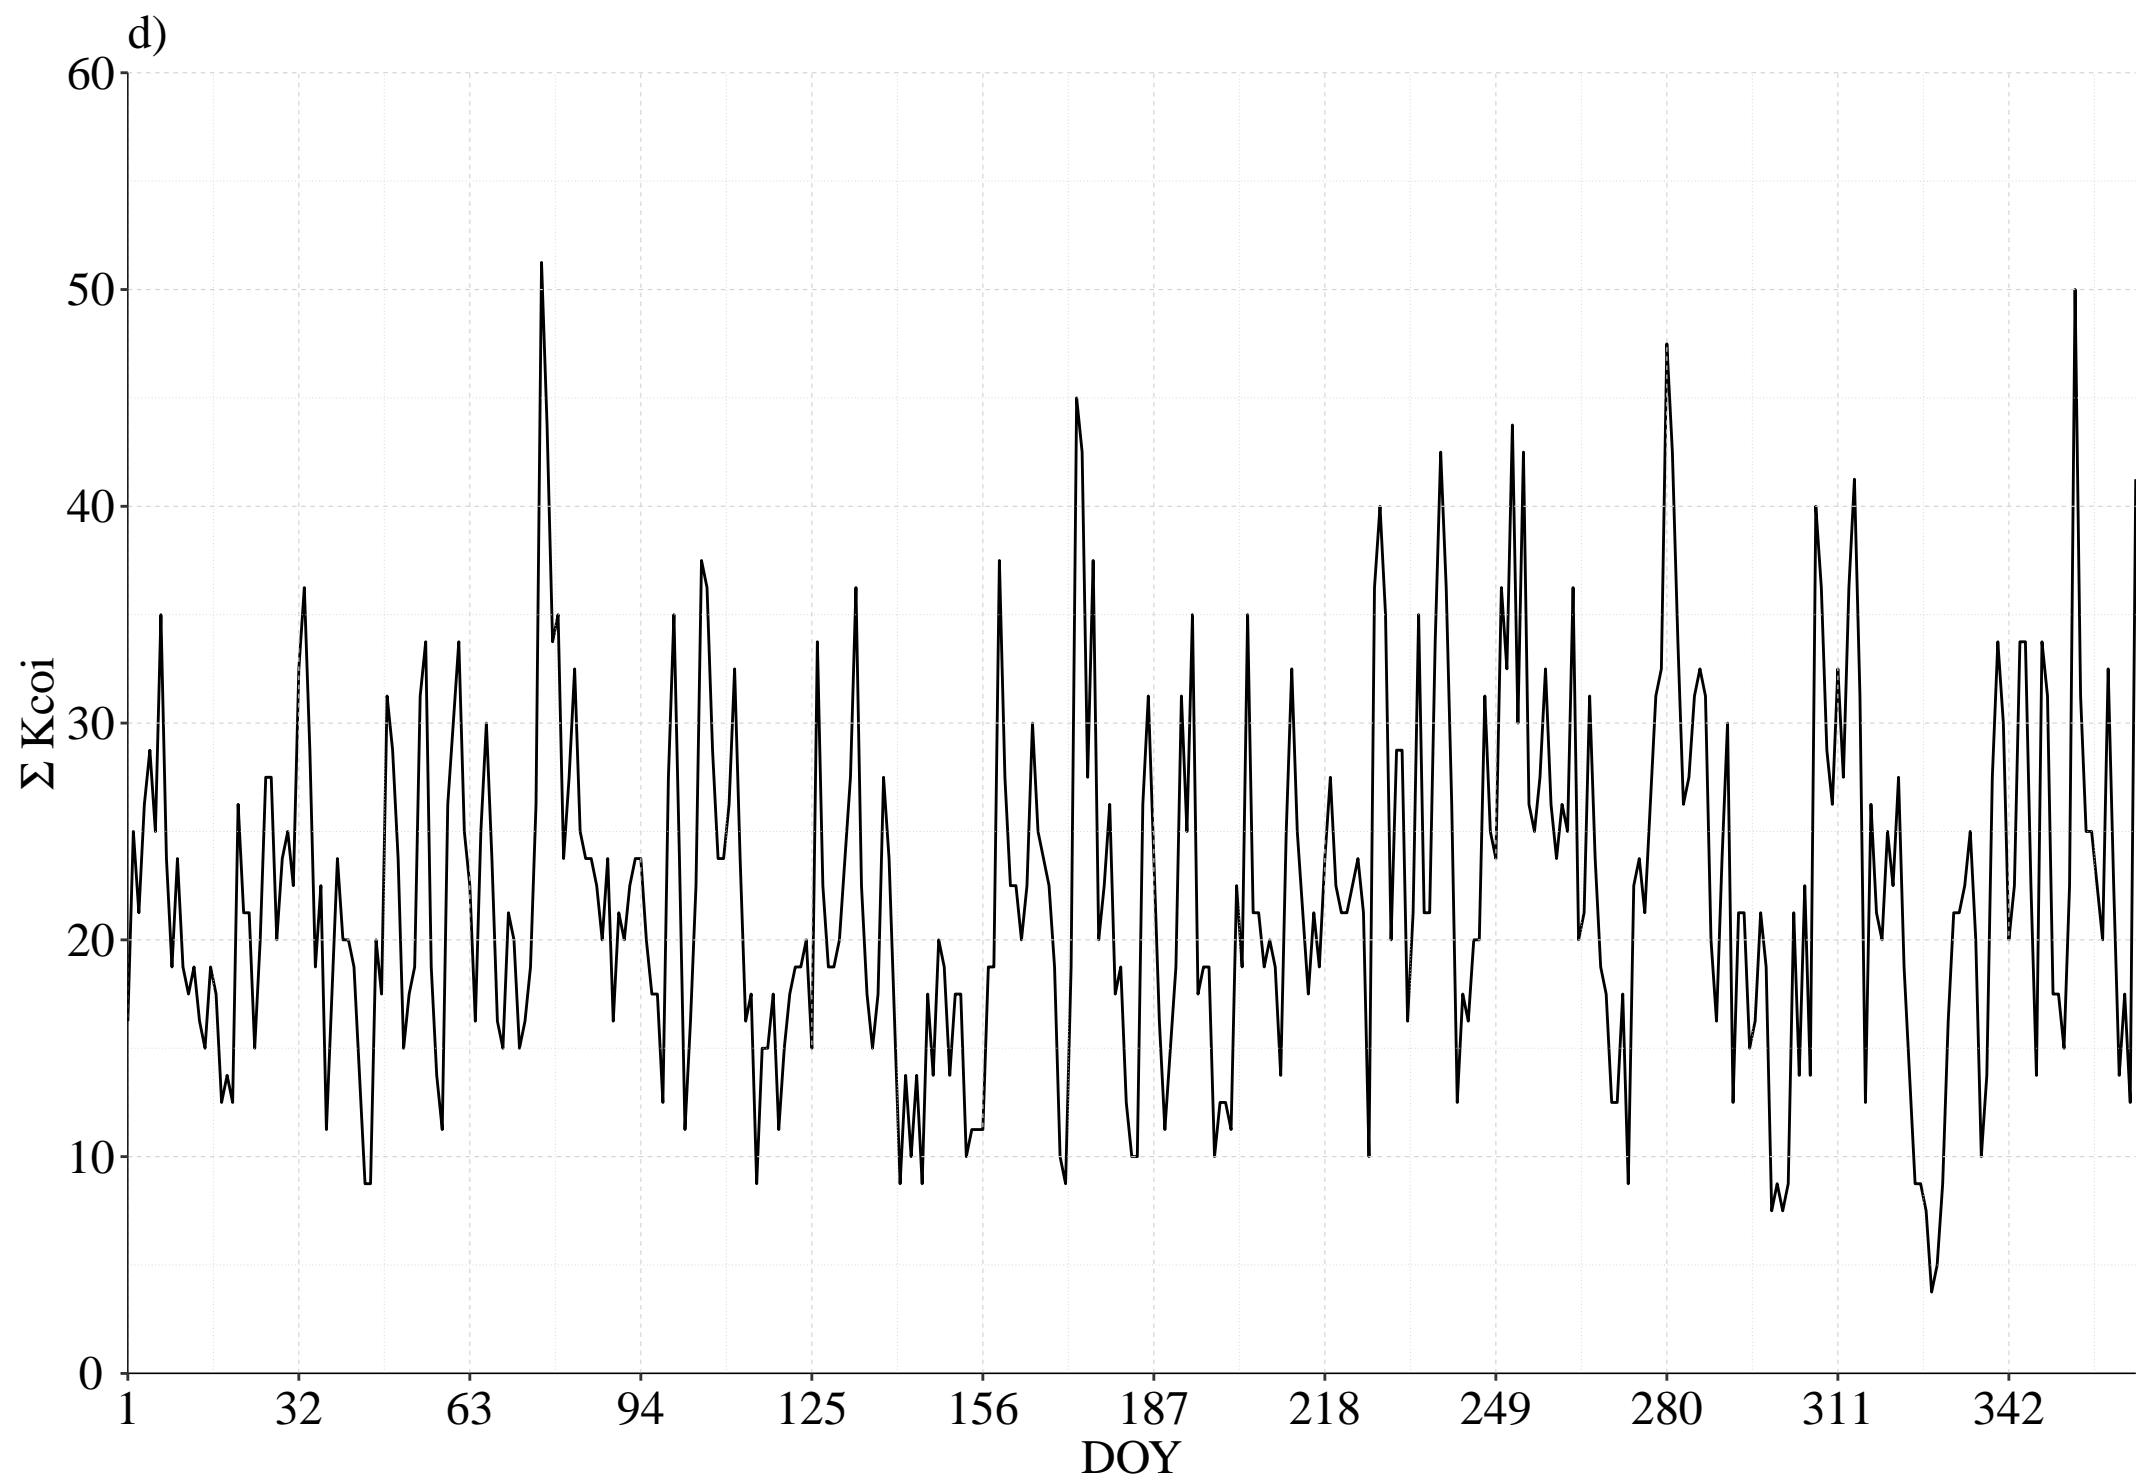

**Figure S4.** Variations (daily mean values) of the solar UV and XR fluxes used to make the PCA-MRM TEC models for 2015: UV Mg II (a) and XR TIMED (b).

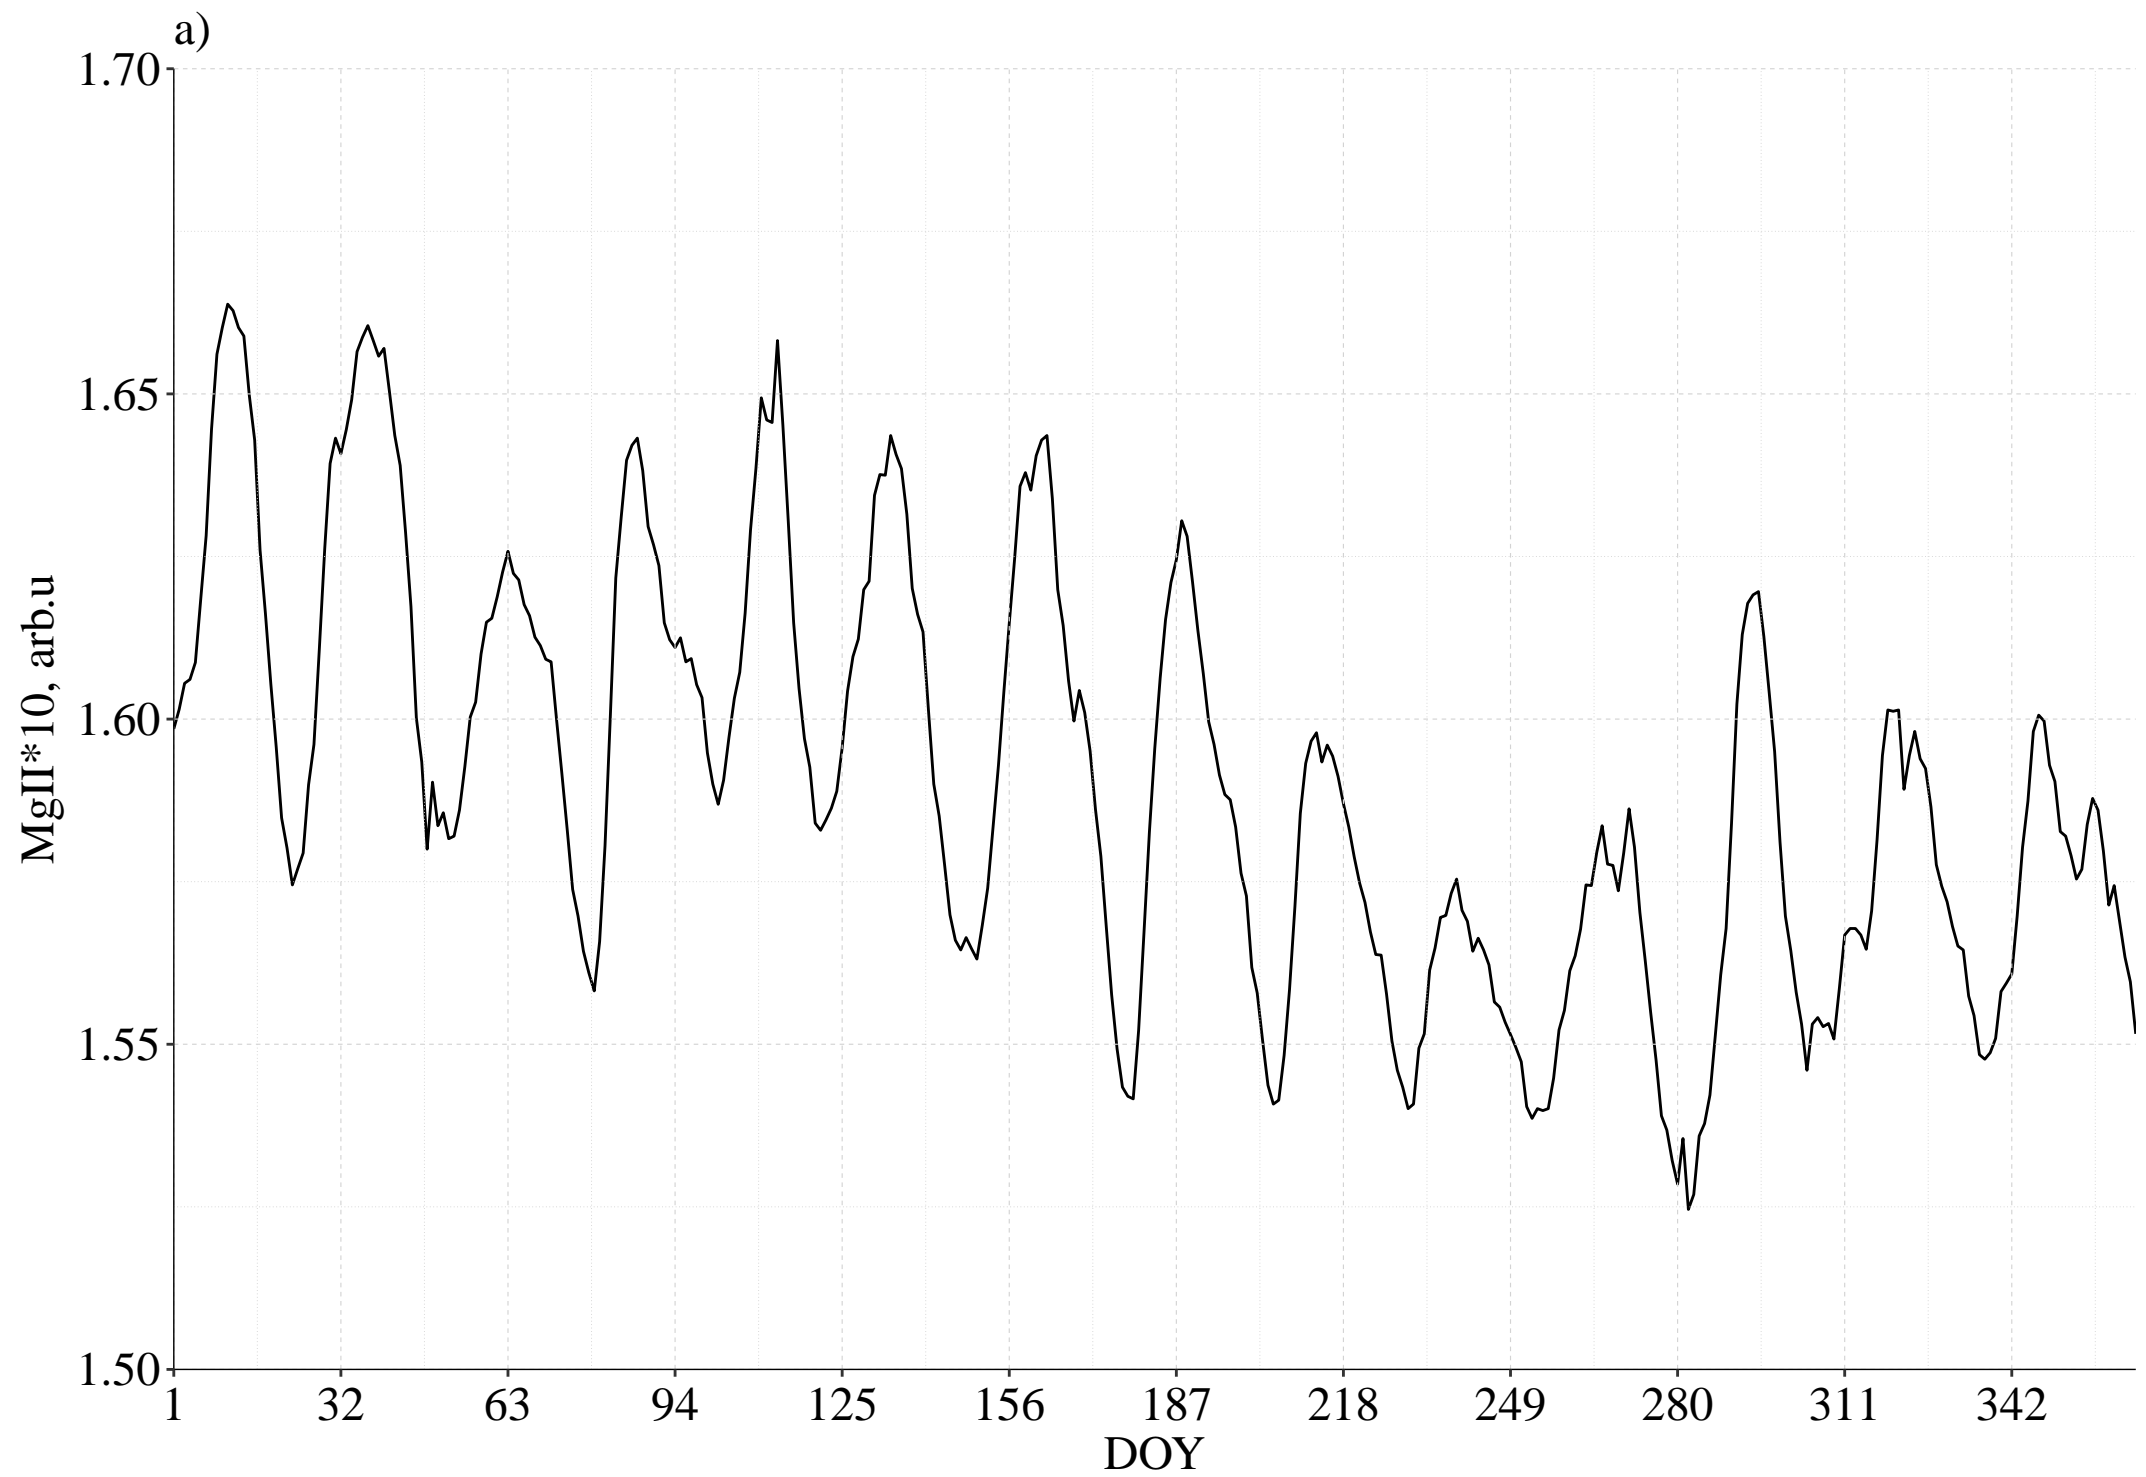

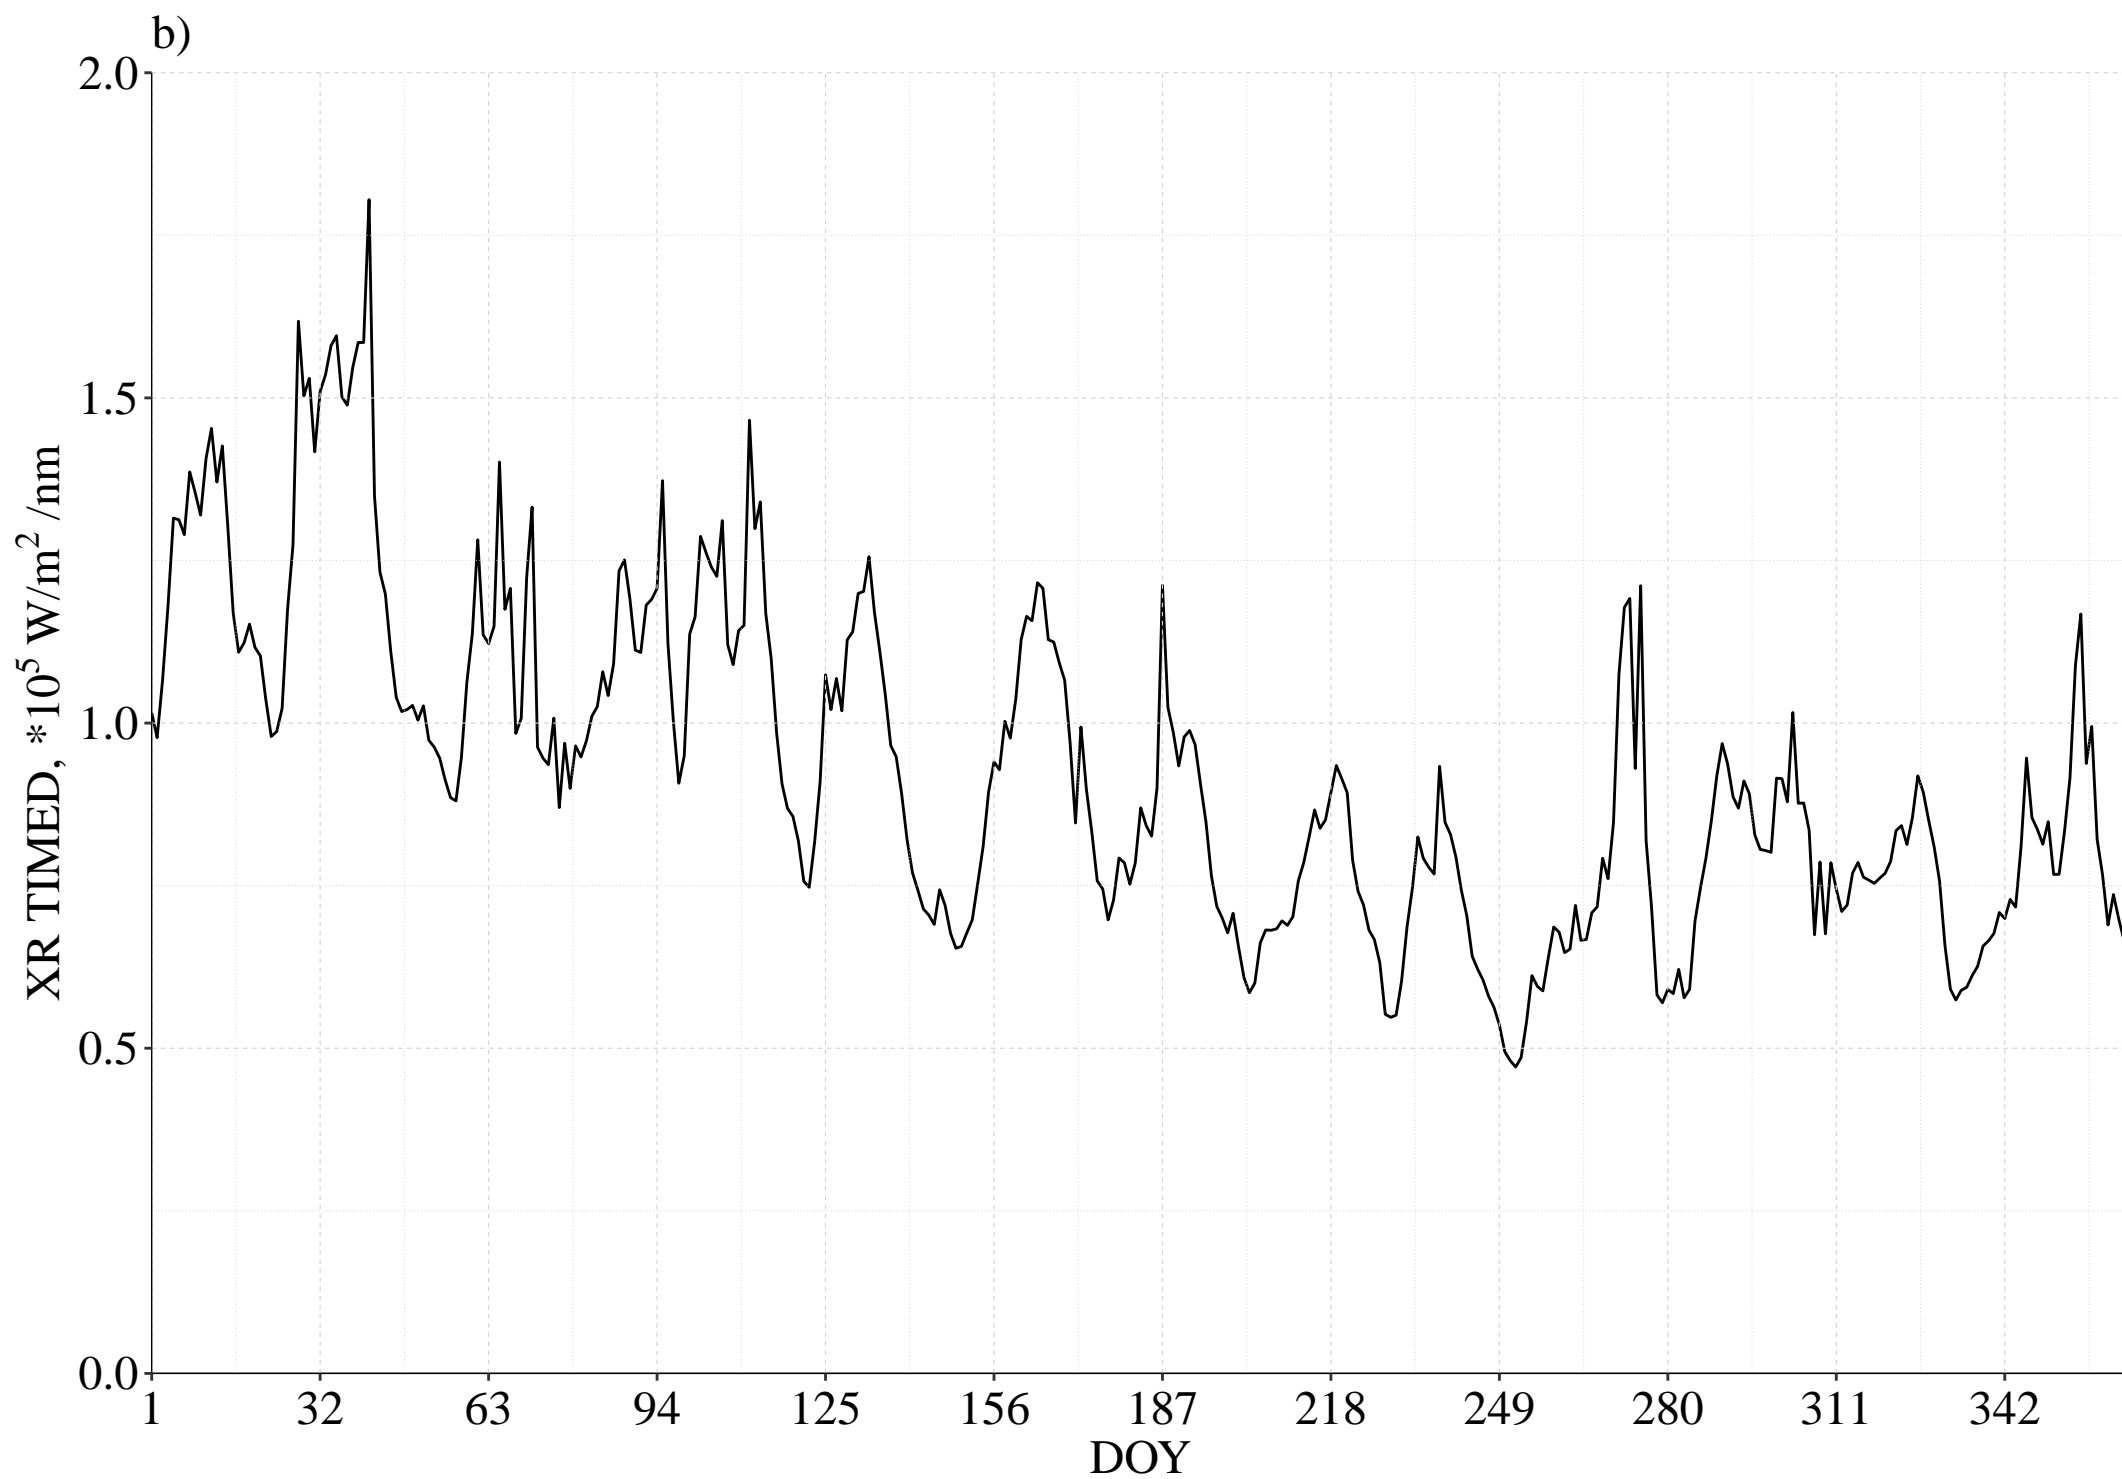

**Figure S5.** Variations (daily mean values) of the number of solar flares used to make the PCA-MRM TEC models for 2015: all flares (a), flares up to C-class (b) and M-class flares (c).

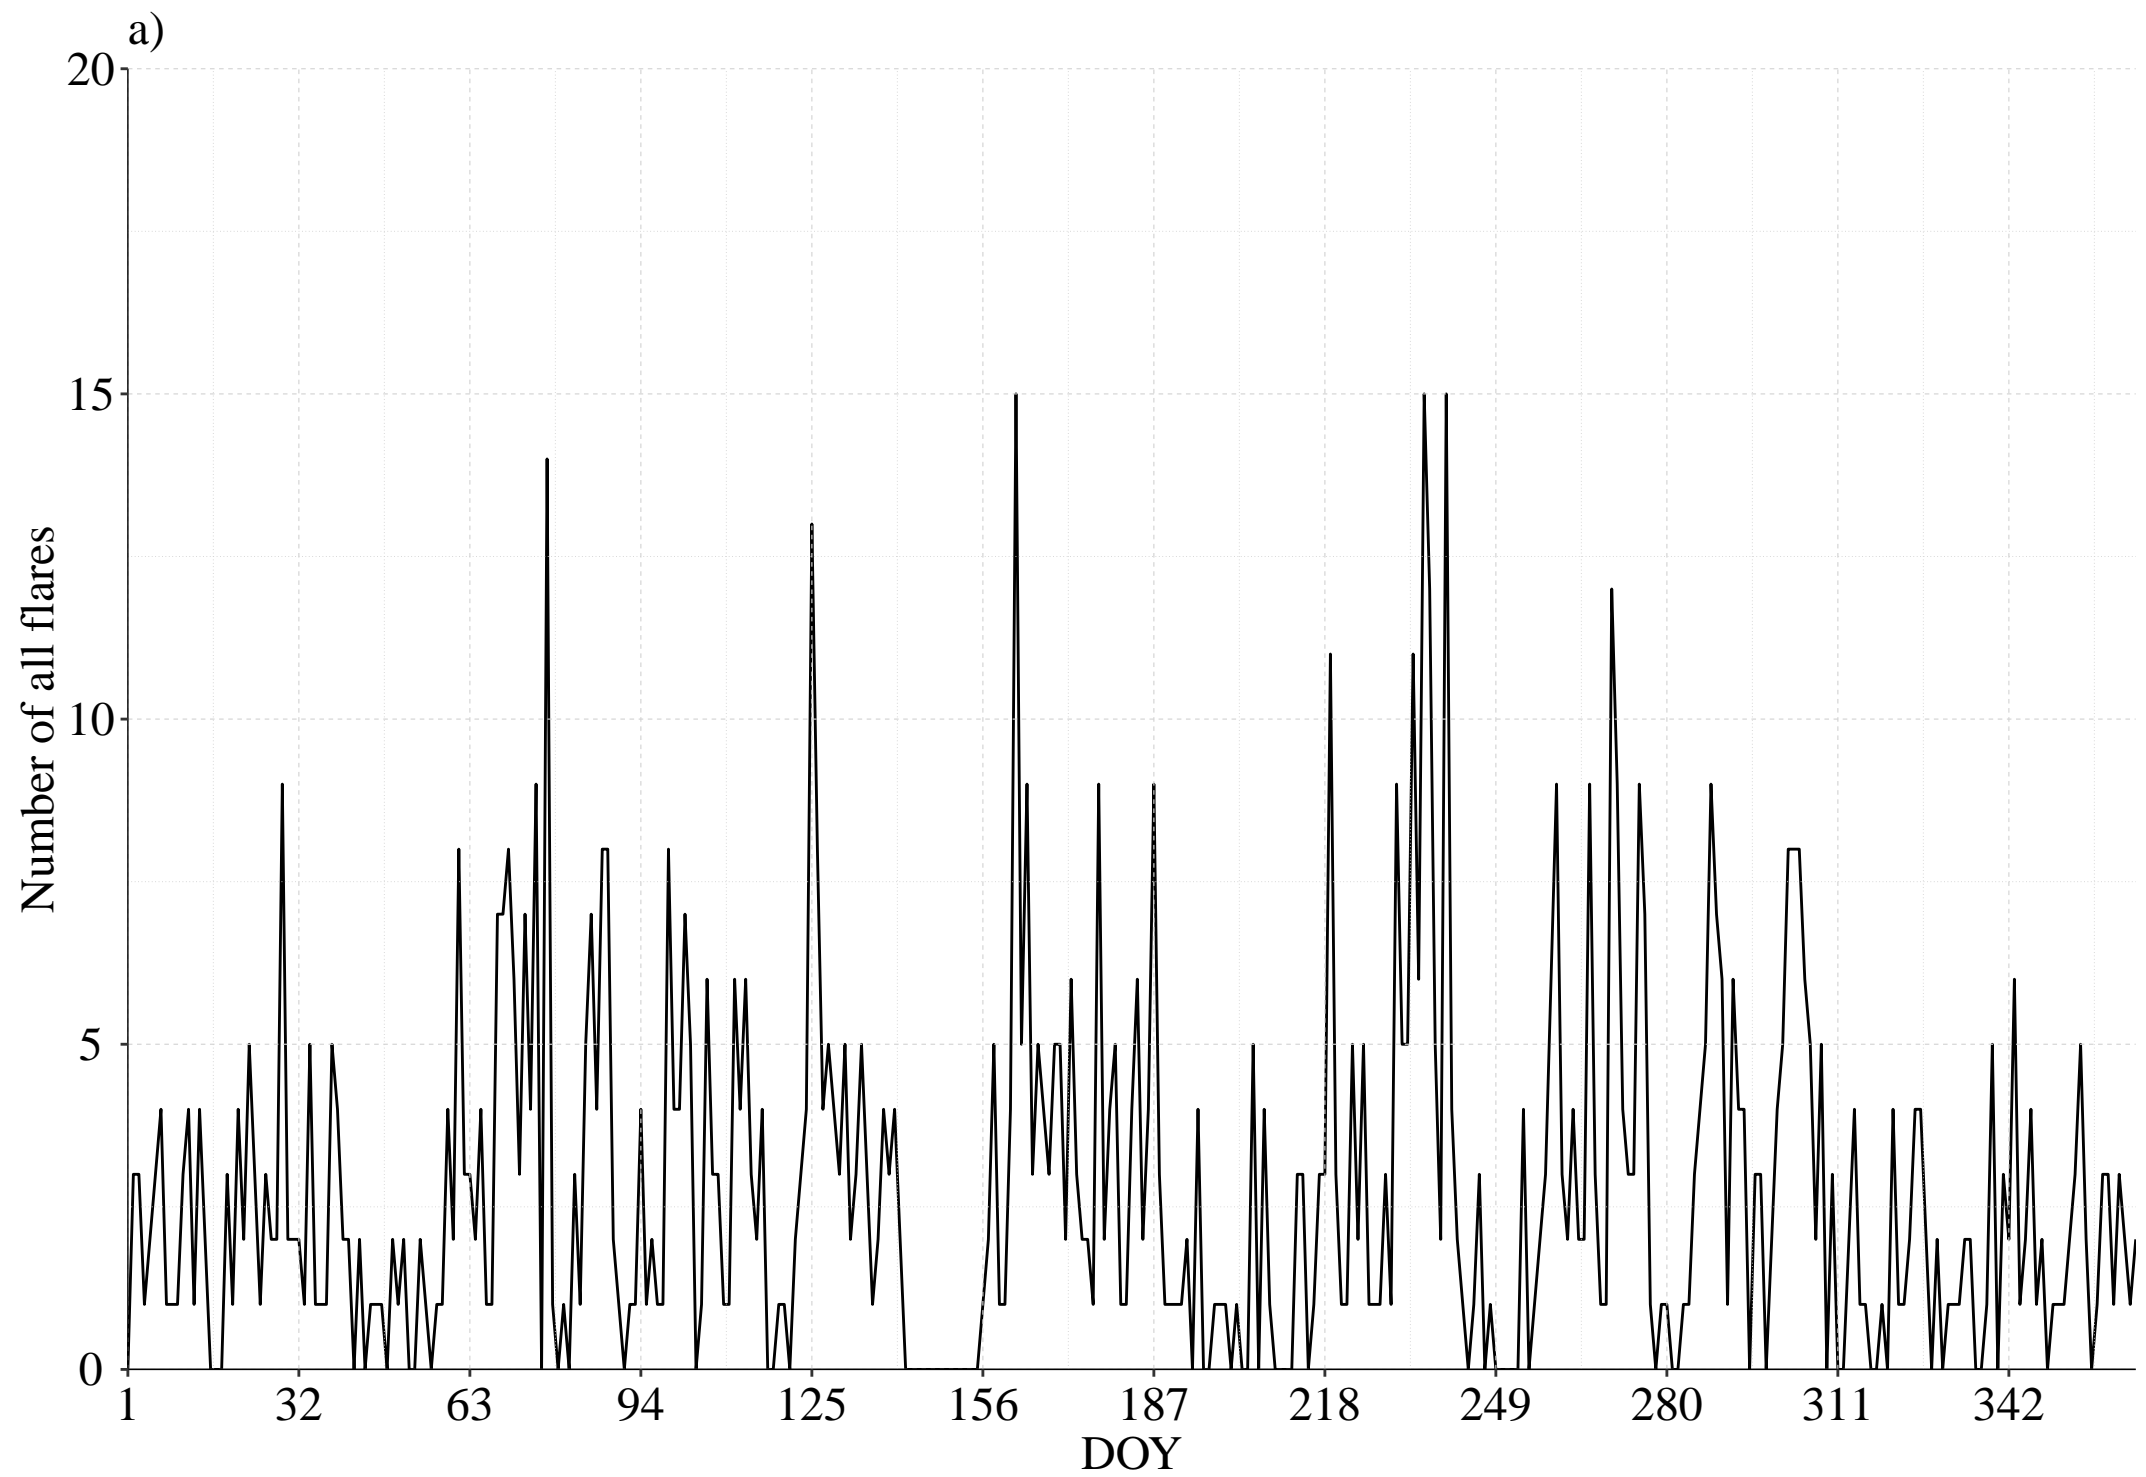

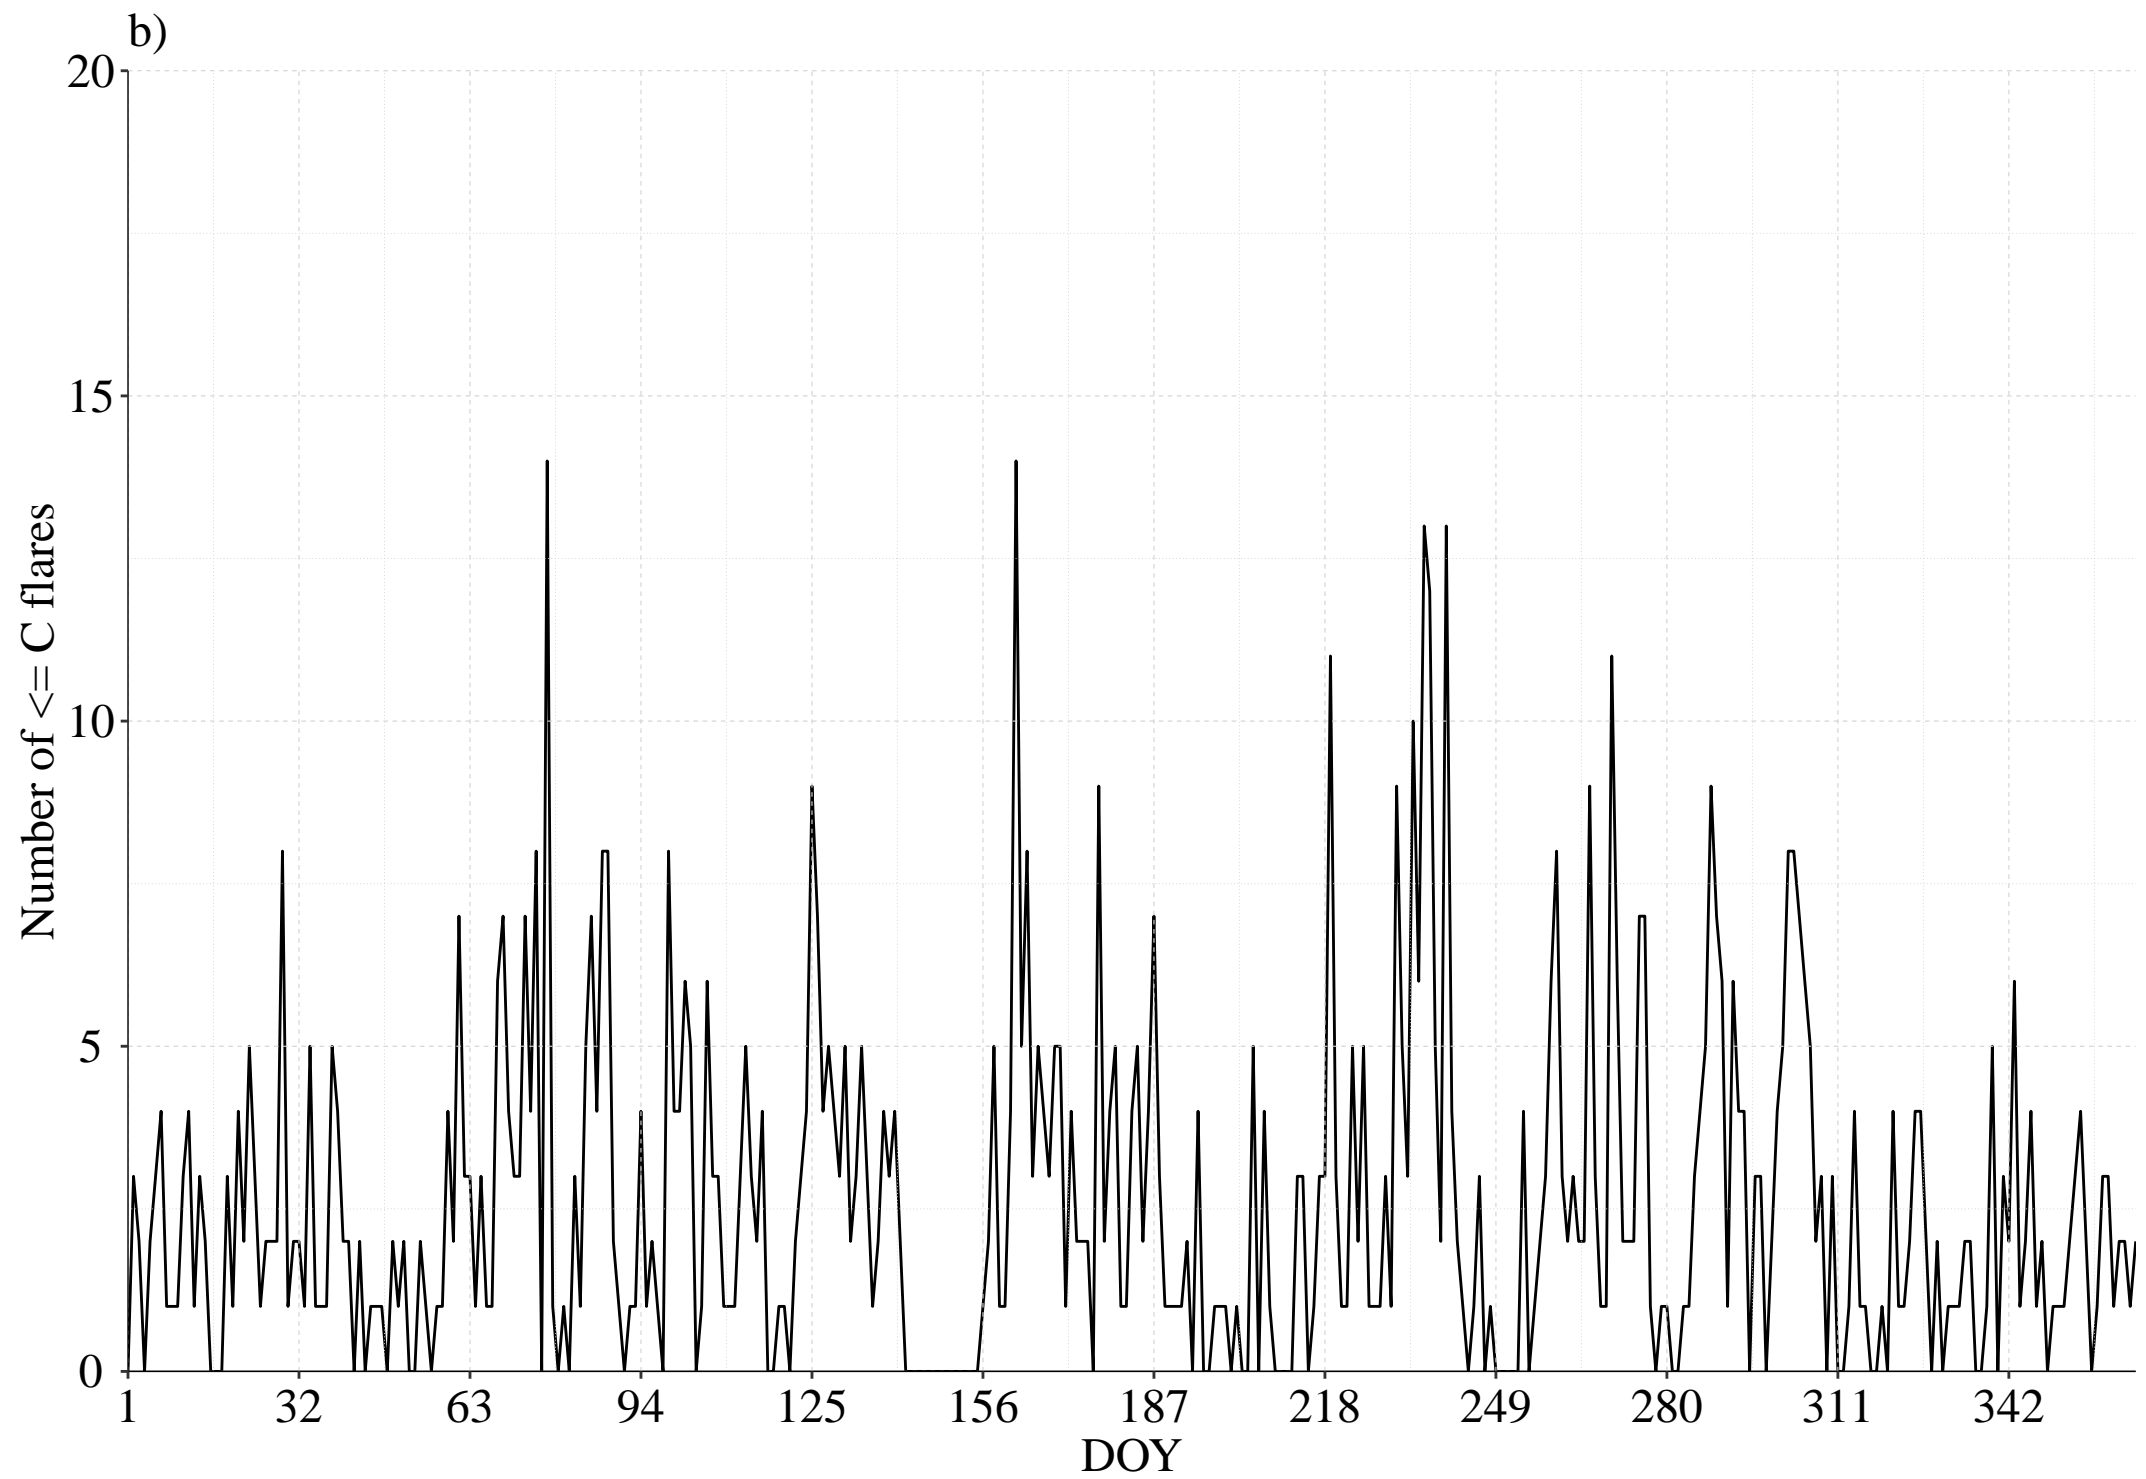

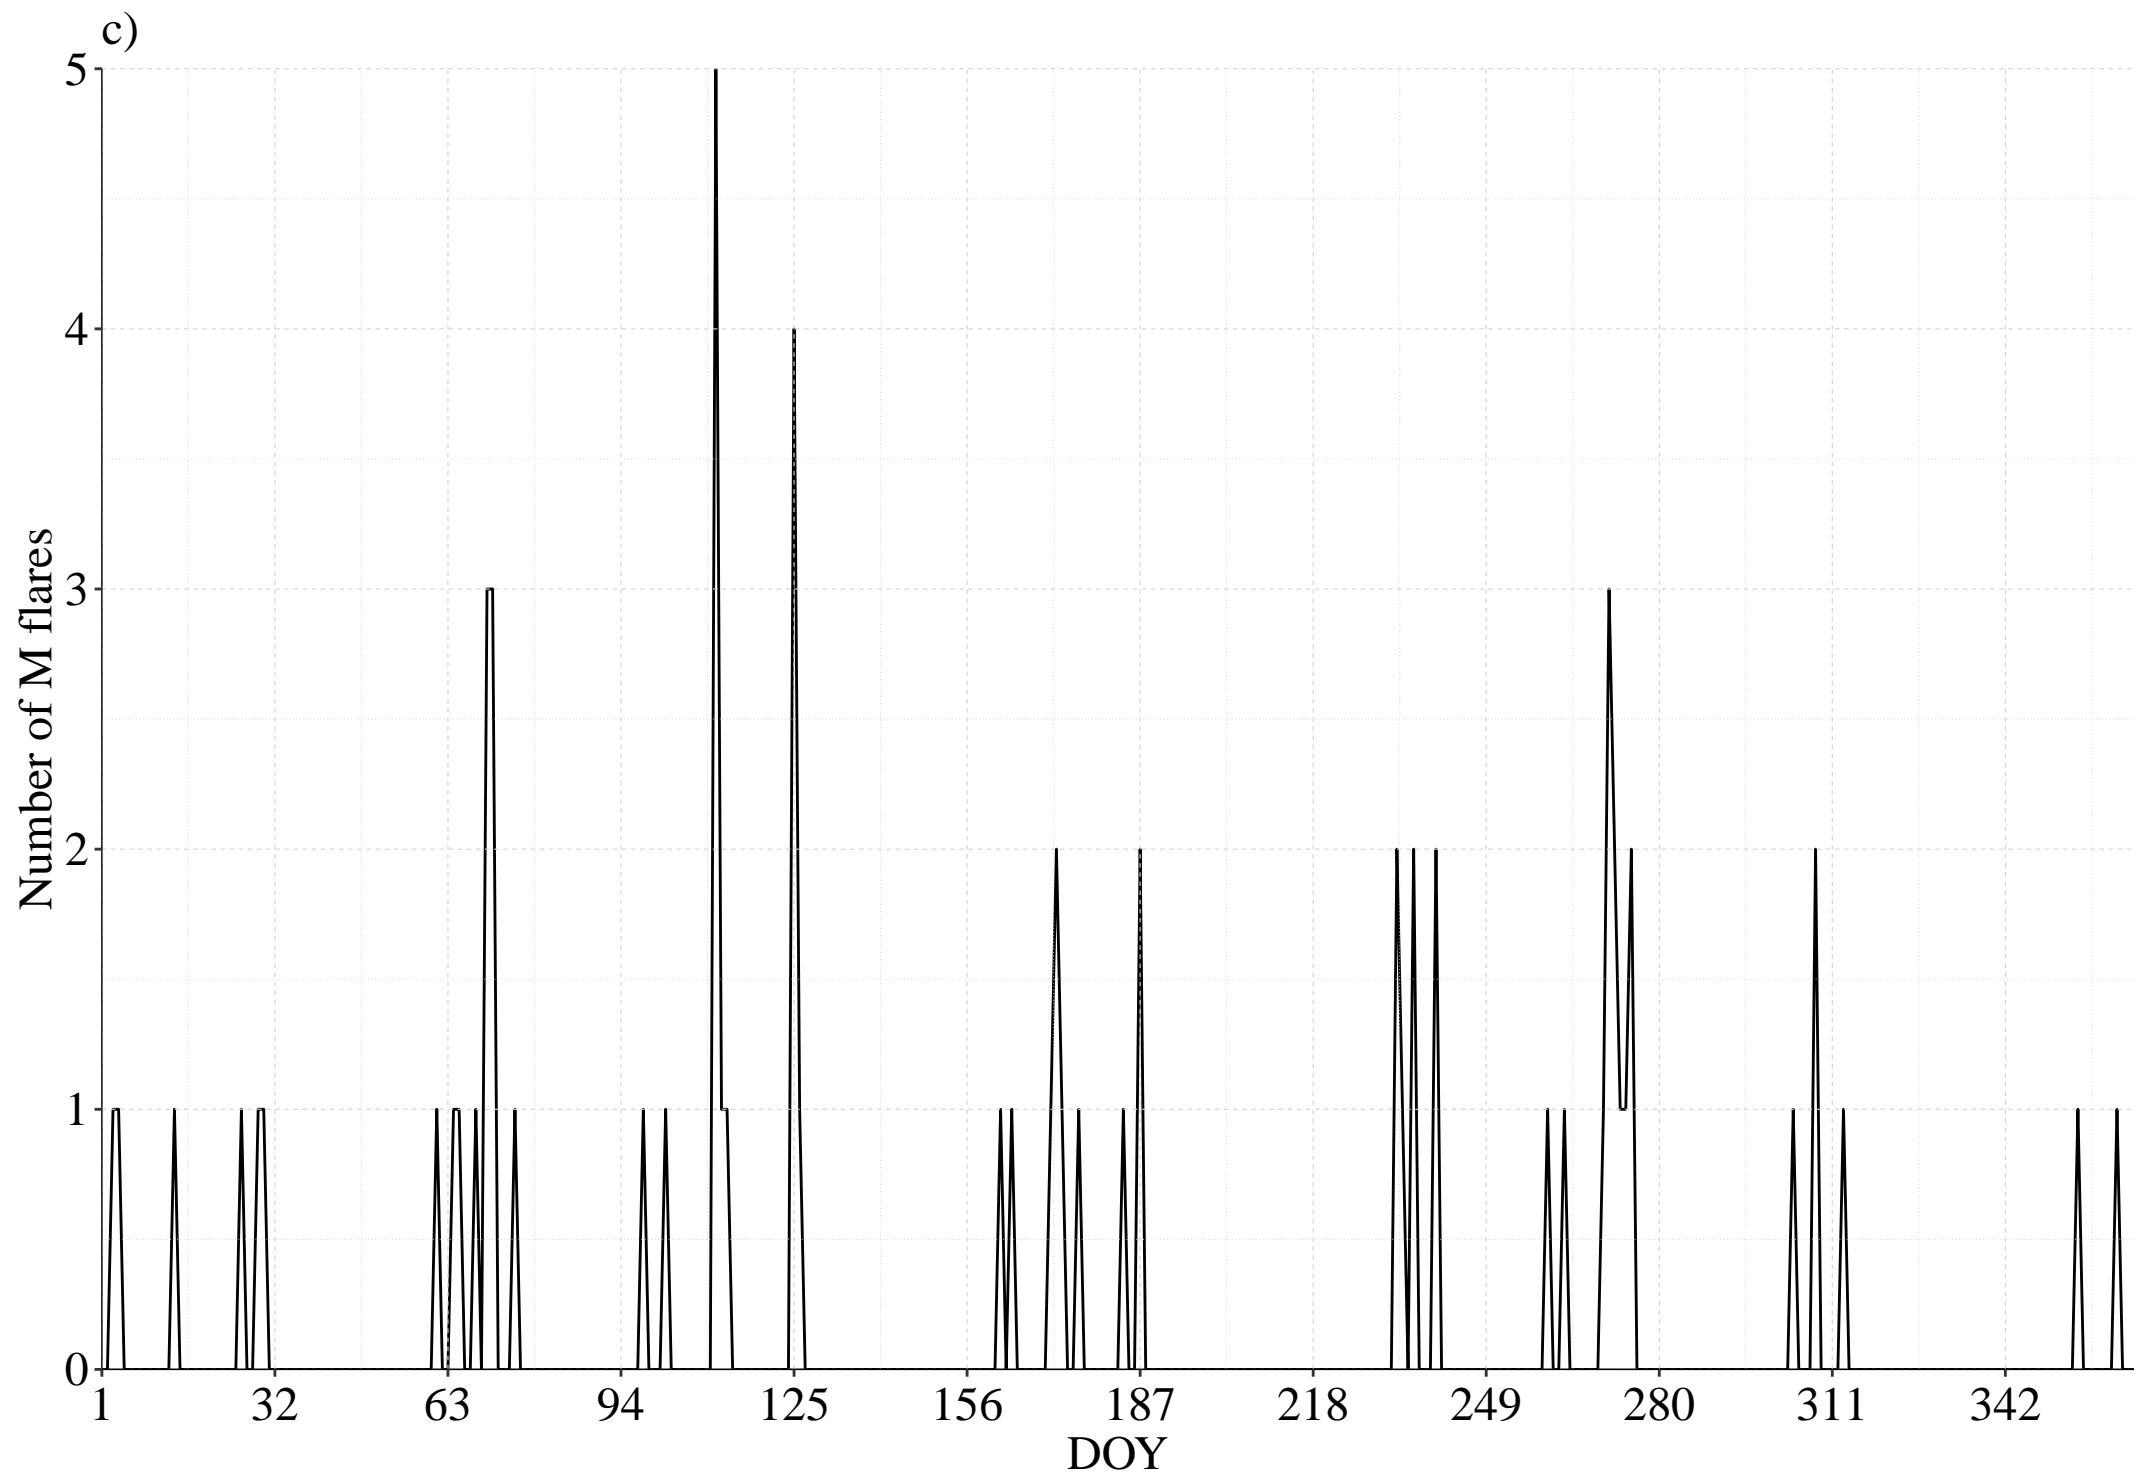

Supplement: s1 [file s1 › PCA-MRM_MDPI-Atmo_SI_Revision2_SeparateFiles_S1-S5_wFigures_v1.pdf]
