# Supplementary material
Source: MDPI journal article supplement (https://www.mdpi.com/2073-4433/13/2/323)
Supplement: s1 [file s1]

Archive with 4 entries (4 files):
- PCA-MRM_MDPI-Atmo_SI_Revision2_SeparateFiles_S1-S5_wFigures_v1.pdf
- PCA-MRM_MDPI-Atmo_SI_Revision2_SeparateFiles_S6_wFigure_v1.pdf
- PCA-MRM_MDPI-Atmo_SI_Revision2_SeparateFiles_S7-S8_wFigures_v2.pdf
- PCA-MRM_MDPI-Atmo_SI_Revision2_SeparateFiles_S9-S19_wFigures_v1.pdf
