# Supplementary material
Source: MDPI journal article supplement (https://www.mdpi.com/2073-4433/13/2/323)
Supplement: s1 [file s1]

# Supplementary Materials

for

## PCA-MRM model to forecast TEC at middle latitudes

by

Anna L. Morozova <sup>1,\*</sup>, Teresa Barata <sup>2</sup> and Tatiana Barlyaeva <sup>3</sup>

<sup>1</sup> Instituto de Astrofísica e Ciências do Espaço, Univ Coimbra, OGAUC, Coimbra, Portugal; [annamorozovauc@gmail.com](mailto:annamorozovauc@gmail.com)

<sup>2</sup> Instituto de Astrofísica e Ciências do Espaço, Univ Coimbra, OGAUC, Coimbra, Portugal; [mtbarata@gmail.com](mailto:mtbarata@gmail.com)

<sup>3</sup> Instituto de Astrofísica e Ciências do Espaço, Univ Coimbra, OGAUC, Coimbra, Portugal; [tvbarlyaeva@gmail.com](mailto:tvbarlyaeva@gmail.com)

\* Correspondence: [annamorozovauc@gmail.com](mailto:annamorozovauc@gmail.com)

This file contains Supplementary Materials (SM) referenced in the main text:

**Figures S9-S19:** Observed and forecasted using the PCA-MRM(L31, mean.lag1.2) model TEC 1h series for June 2015 with 90% confidence interval for February to December of 2015.

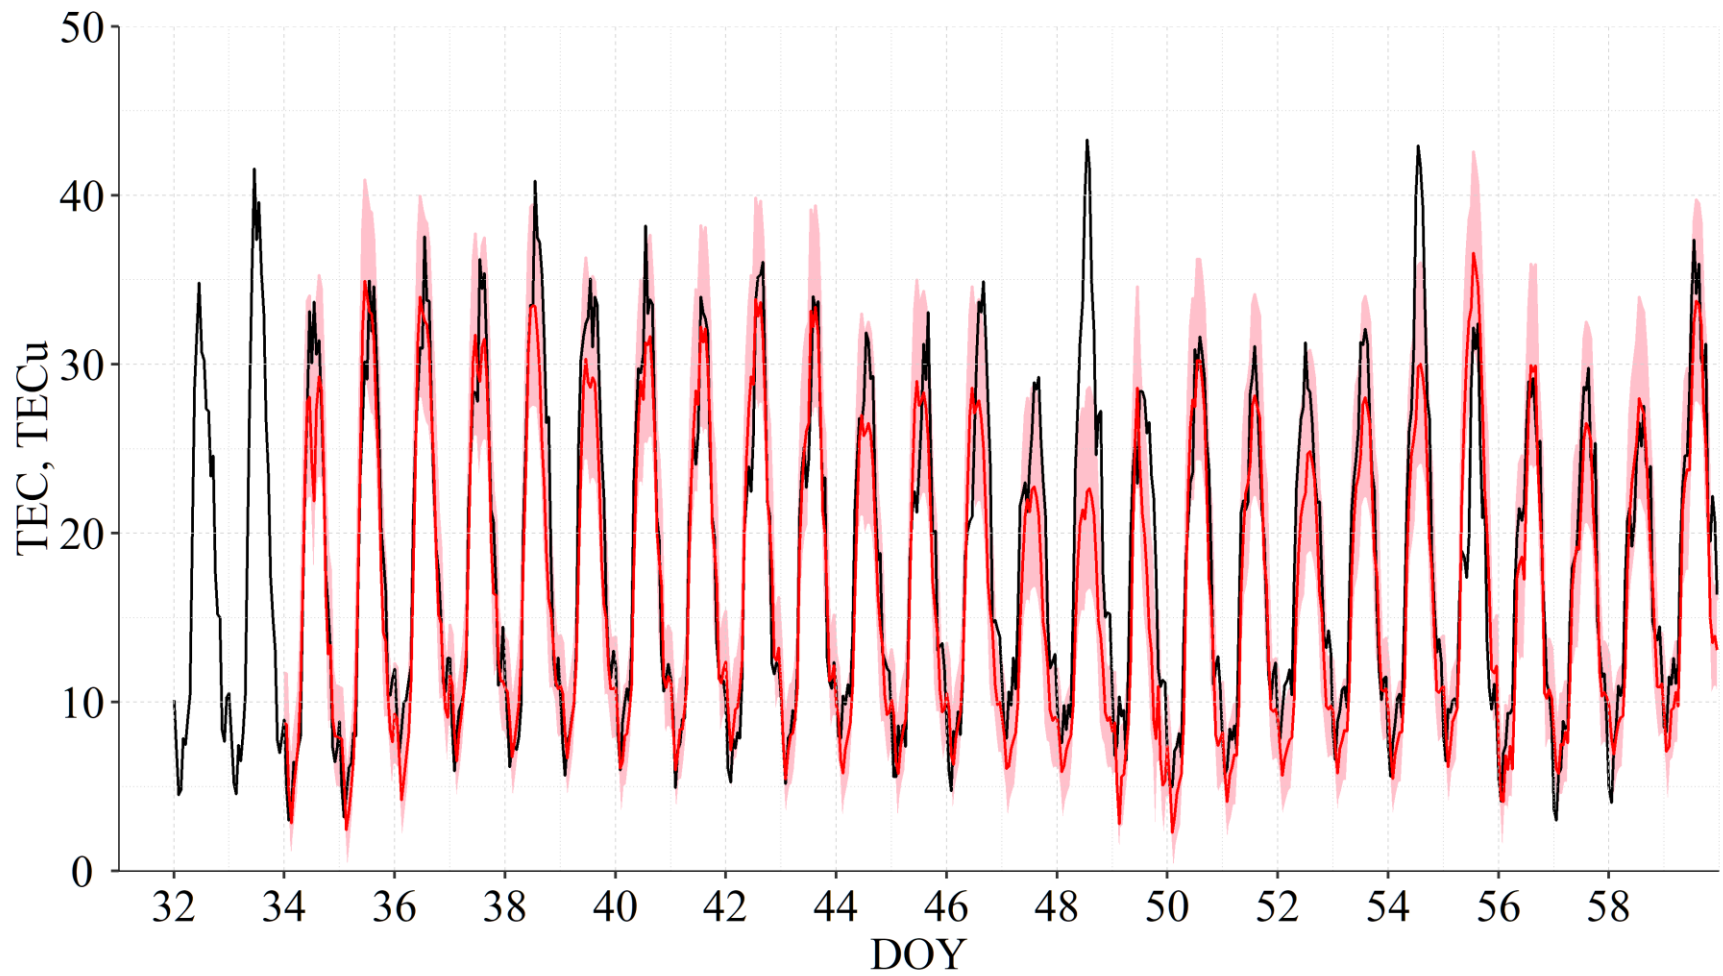

**Figure S9.** Observed (black) and forecasted using the PCA-MRM(L31, mean.lag1.2) model (red) TEC 1h series for February 2015; pink area shows 90% confidence interval.

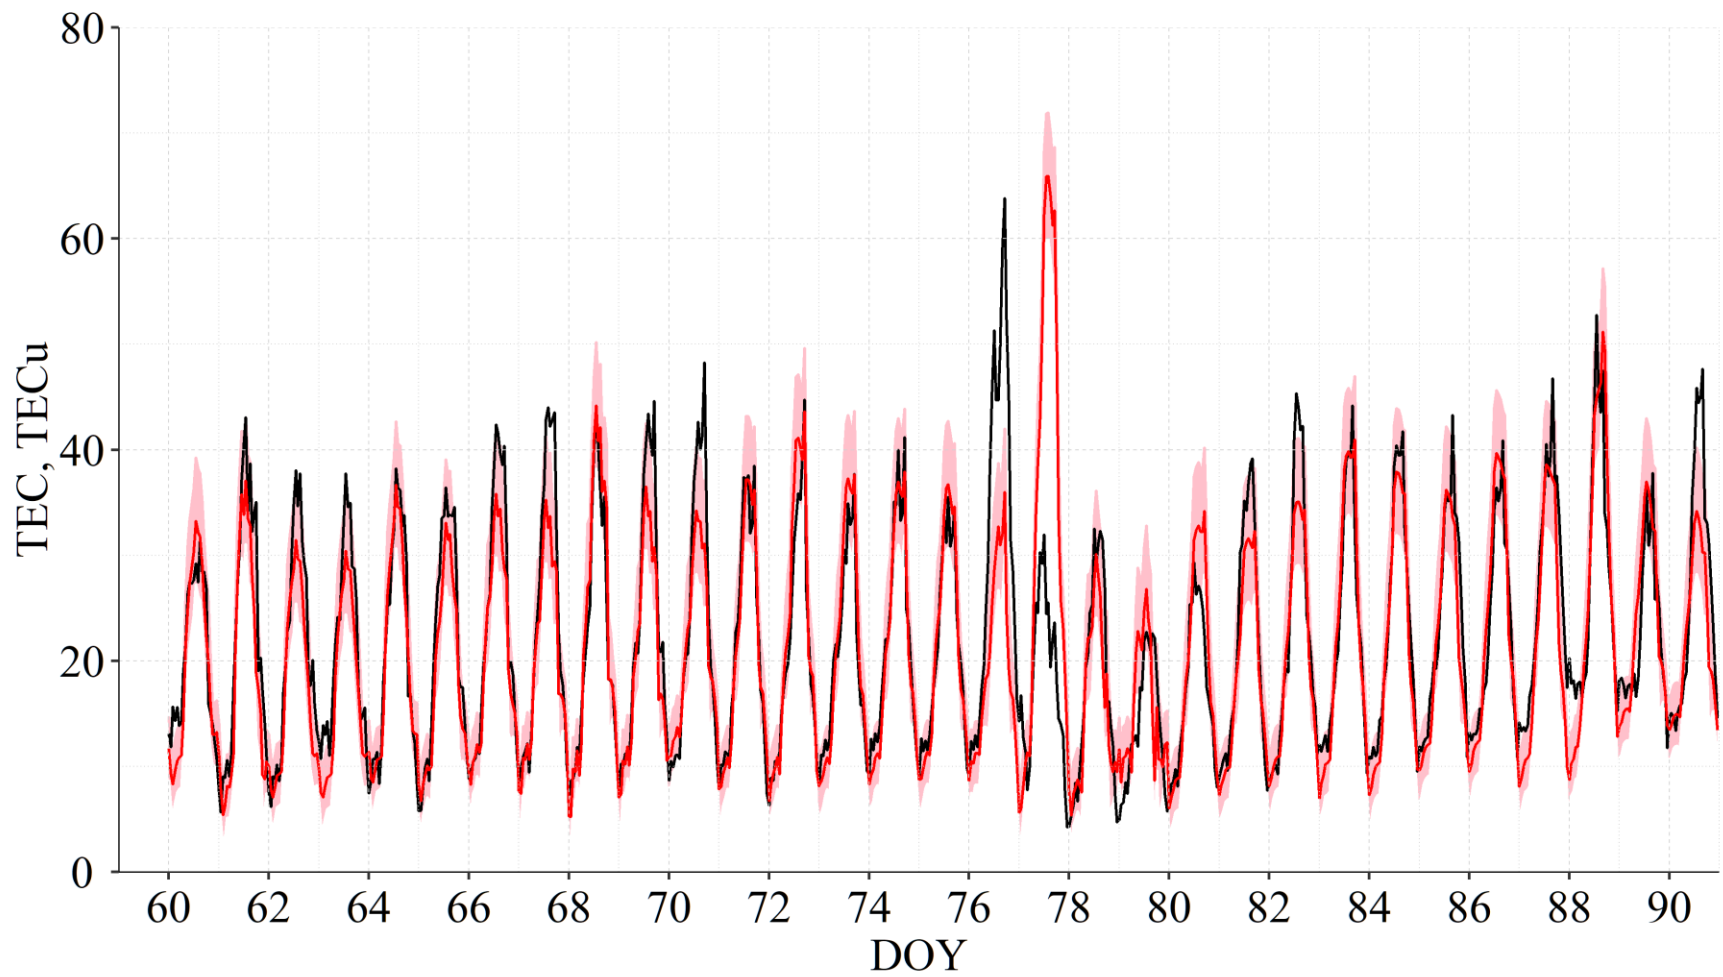

**Figure S10.** Observed (black) and forecasted using the PCA-MRM(L31, mean.lag1.2) model (red) TEC 1h series for March 2015; pink area shows 90% confidence interval.

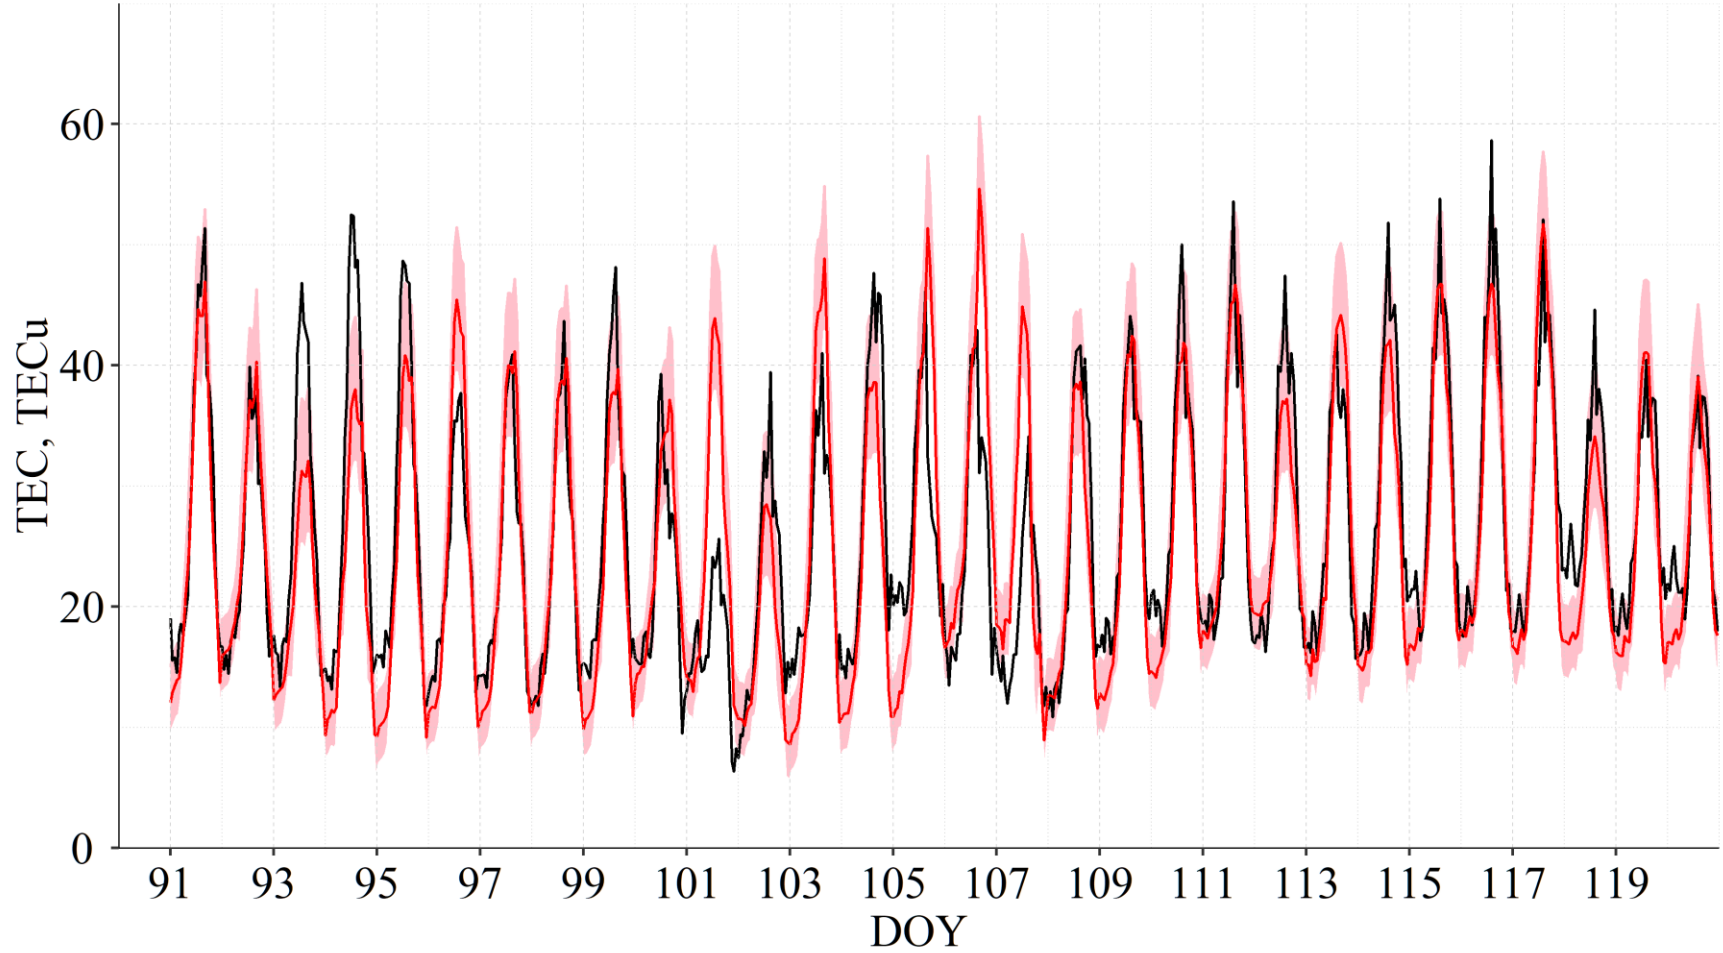

**Figure S11.** Observed (black) and forecasted using the PCA-MRM(L31, mean.lag1.2) model (red) TEC 1h series for April 2015; pink area shows 90% confidence interval.

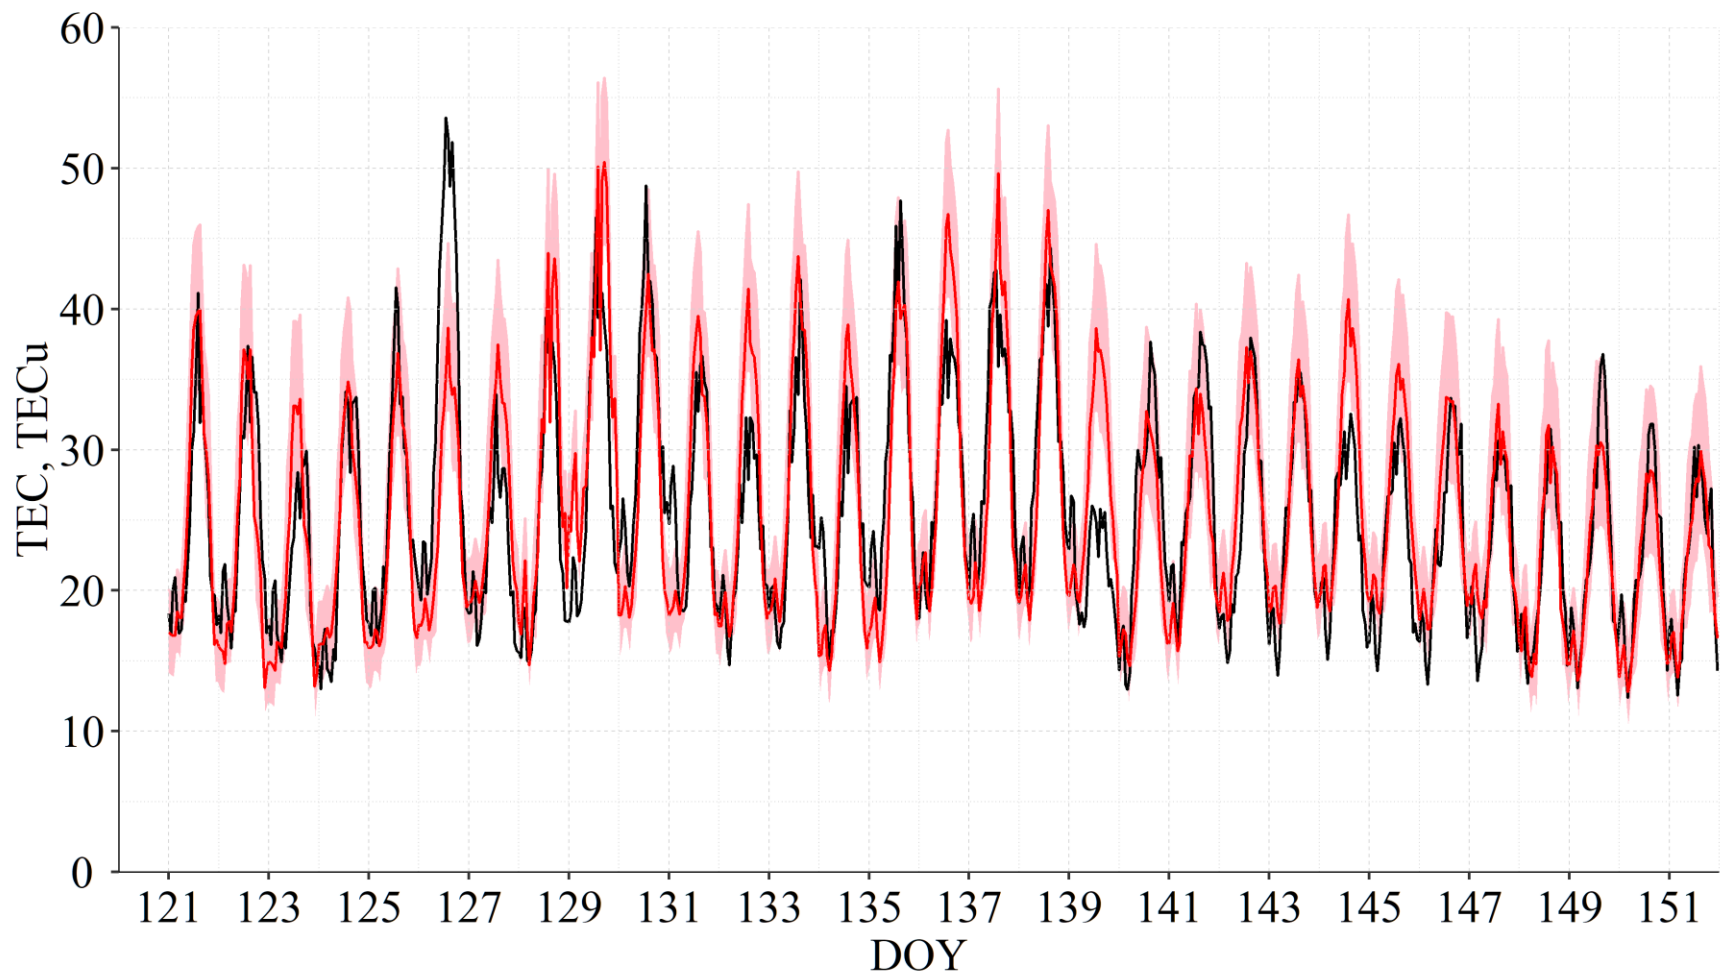

**Figure S12.** Observed (black) and forecasted using the PCA-MRM(L31, mean.lag1.2) model (red) TEC 1h series for May 2015; pink area shows 90% confidence interval.

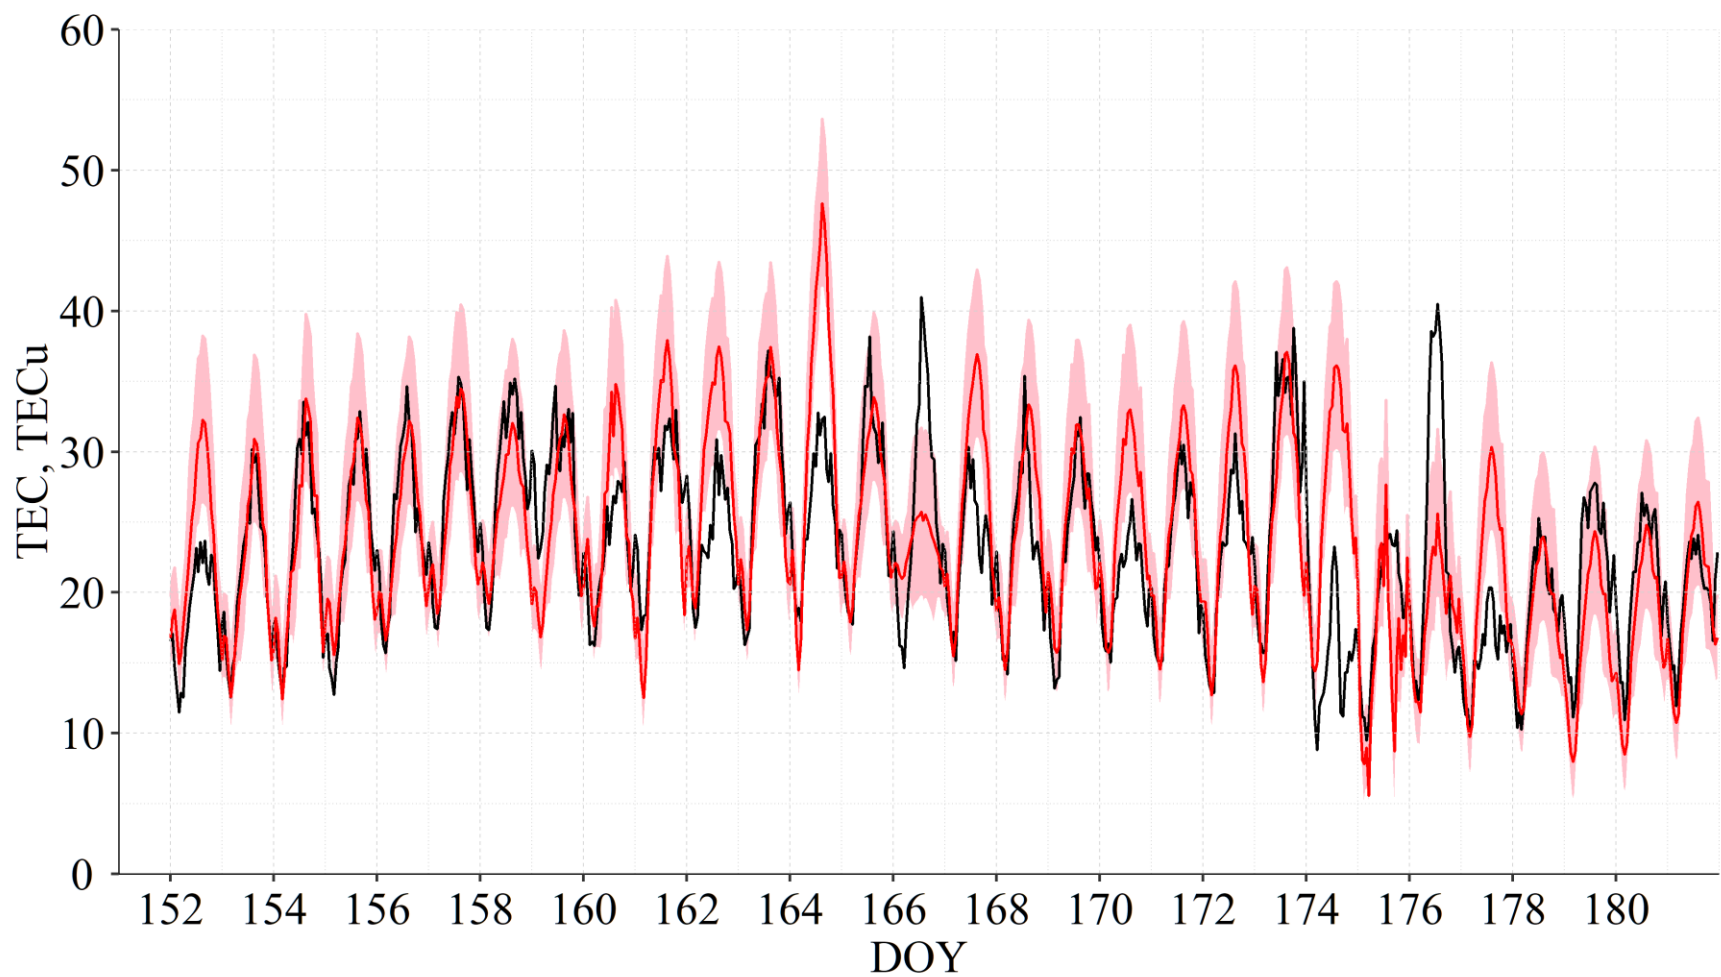

**Figure S13.** Observed (black) and forecasted using the PCA-MRM(L31, mean.lag1.2) model (red) TEC 1h series for June 2015; pink area shows 90% confidence interval.

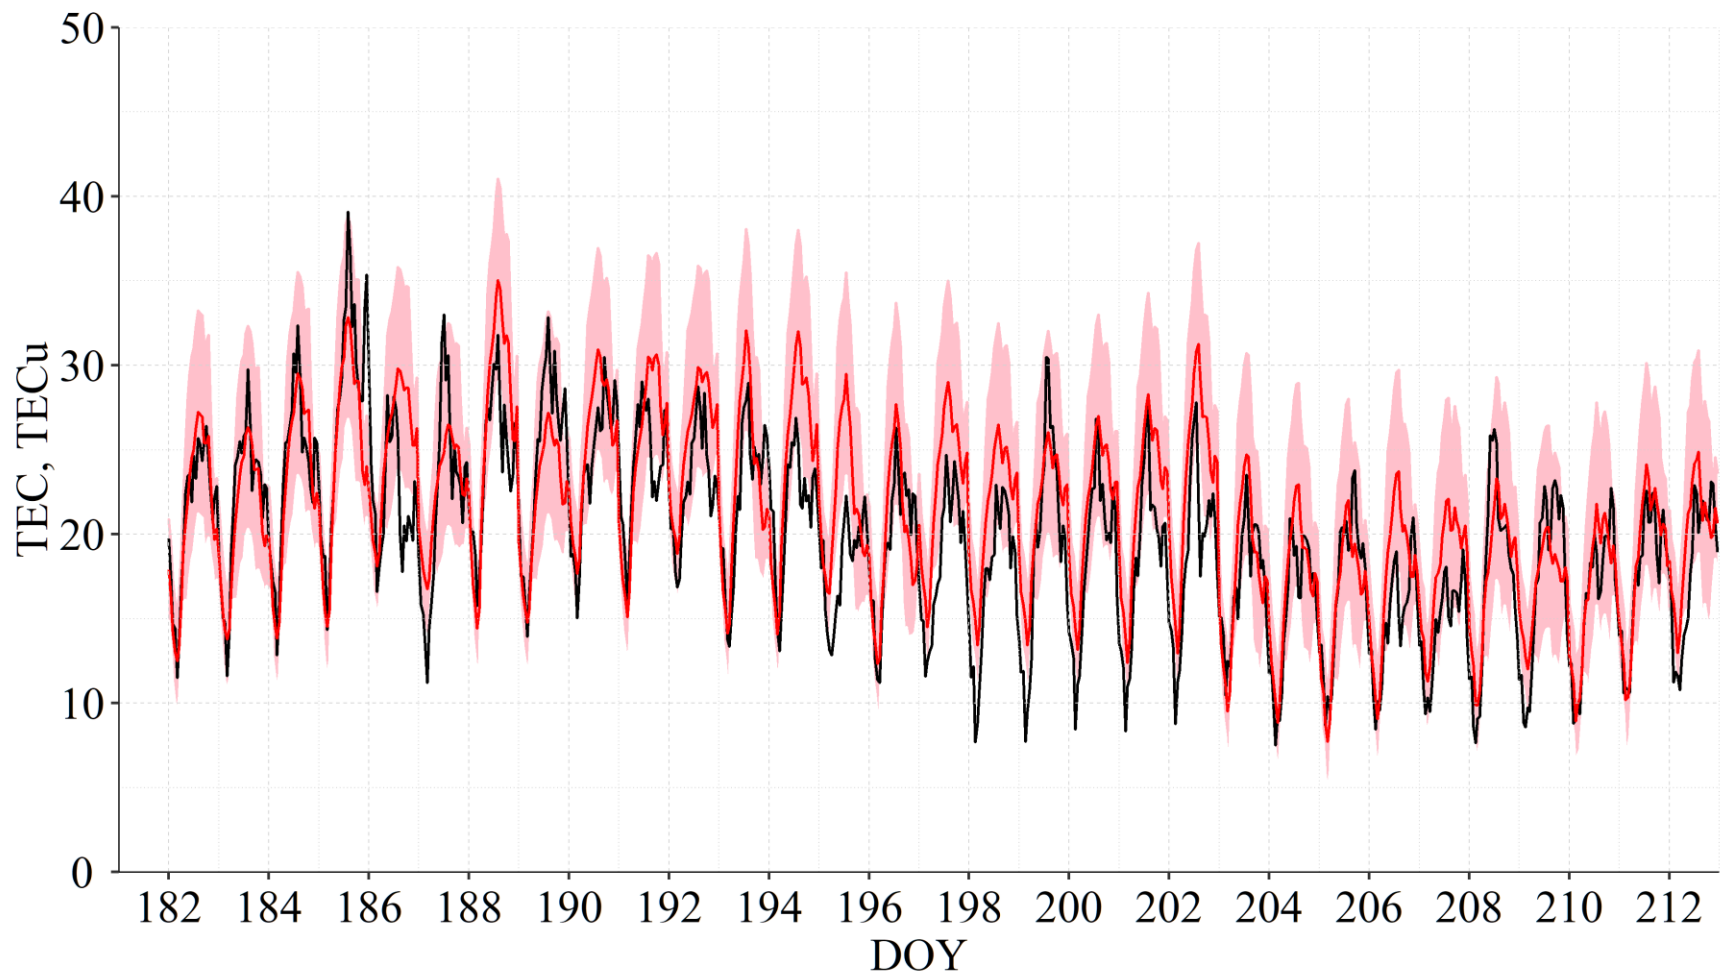

**Figure S14.** Observed (black) and forecasted using the PCA-MRM(L31, mean.lag1.2) model (red) TEC 1h series for July 2015; pink area shows 90% confidence interval.

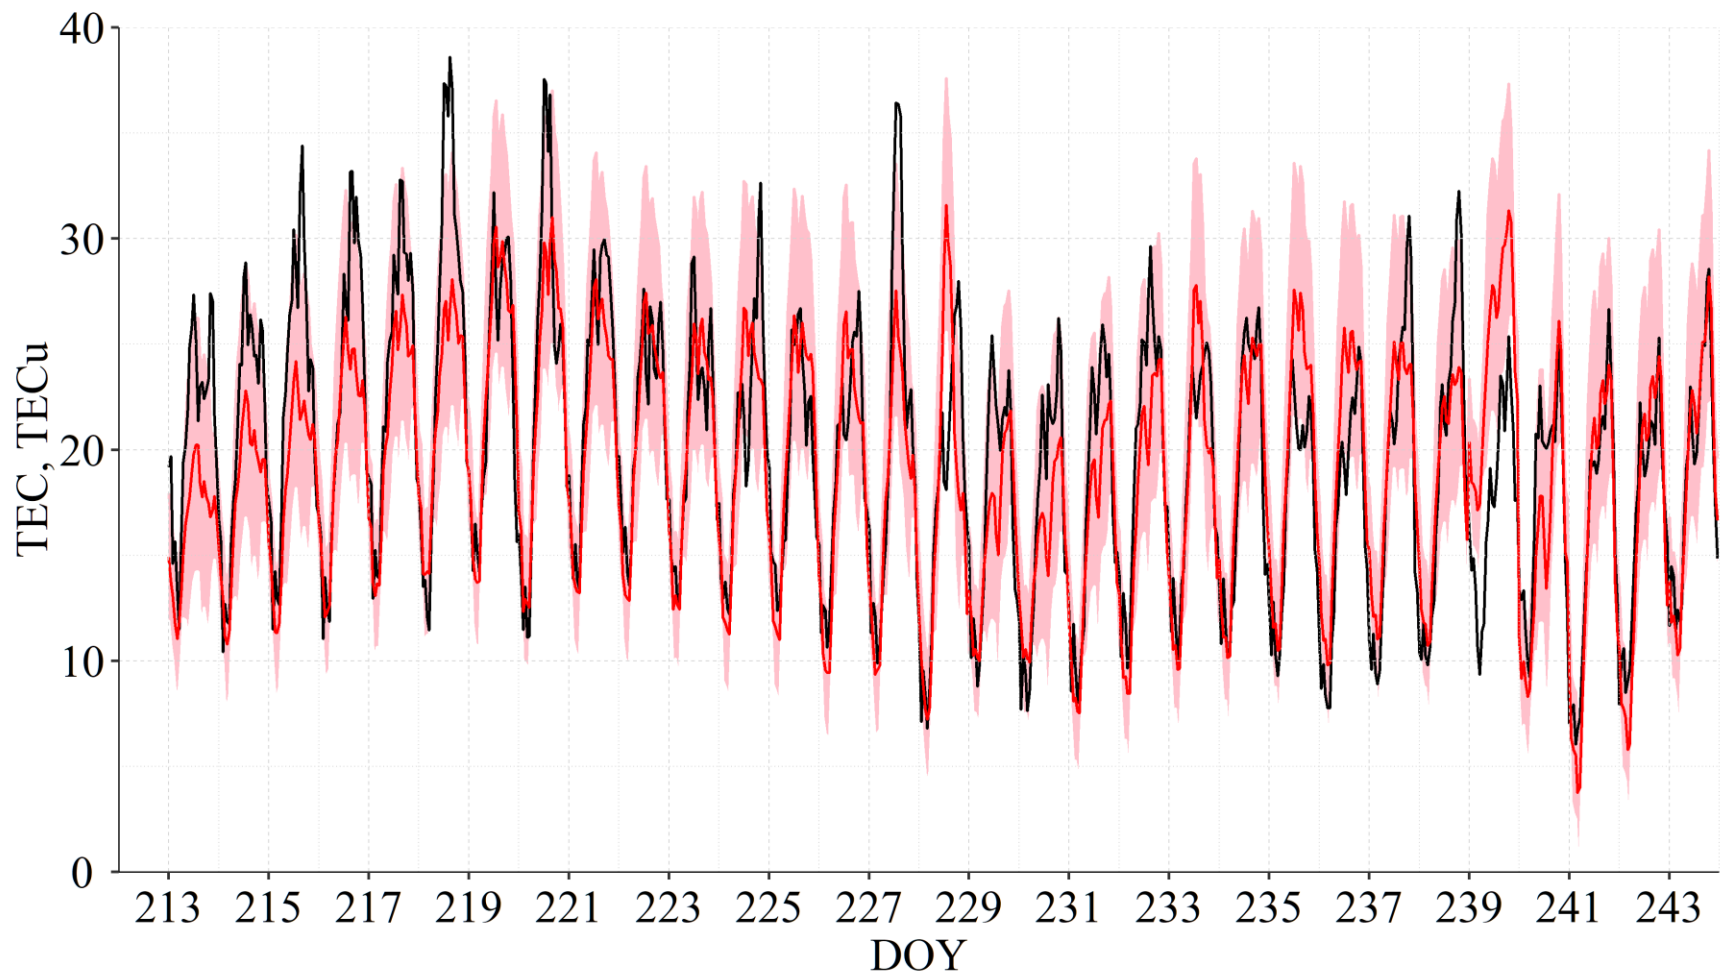

**Figure S15.** Observed (black) and forecasted using the PCA-MRM(L31, mean.lag1.2) model (red) TEC 1h series for August 2015; pink area shows 90% confidence interval.



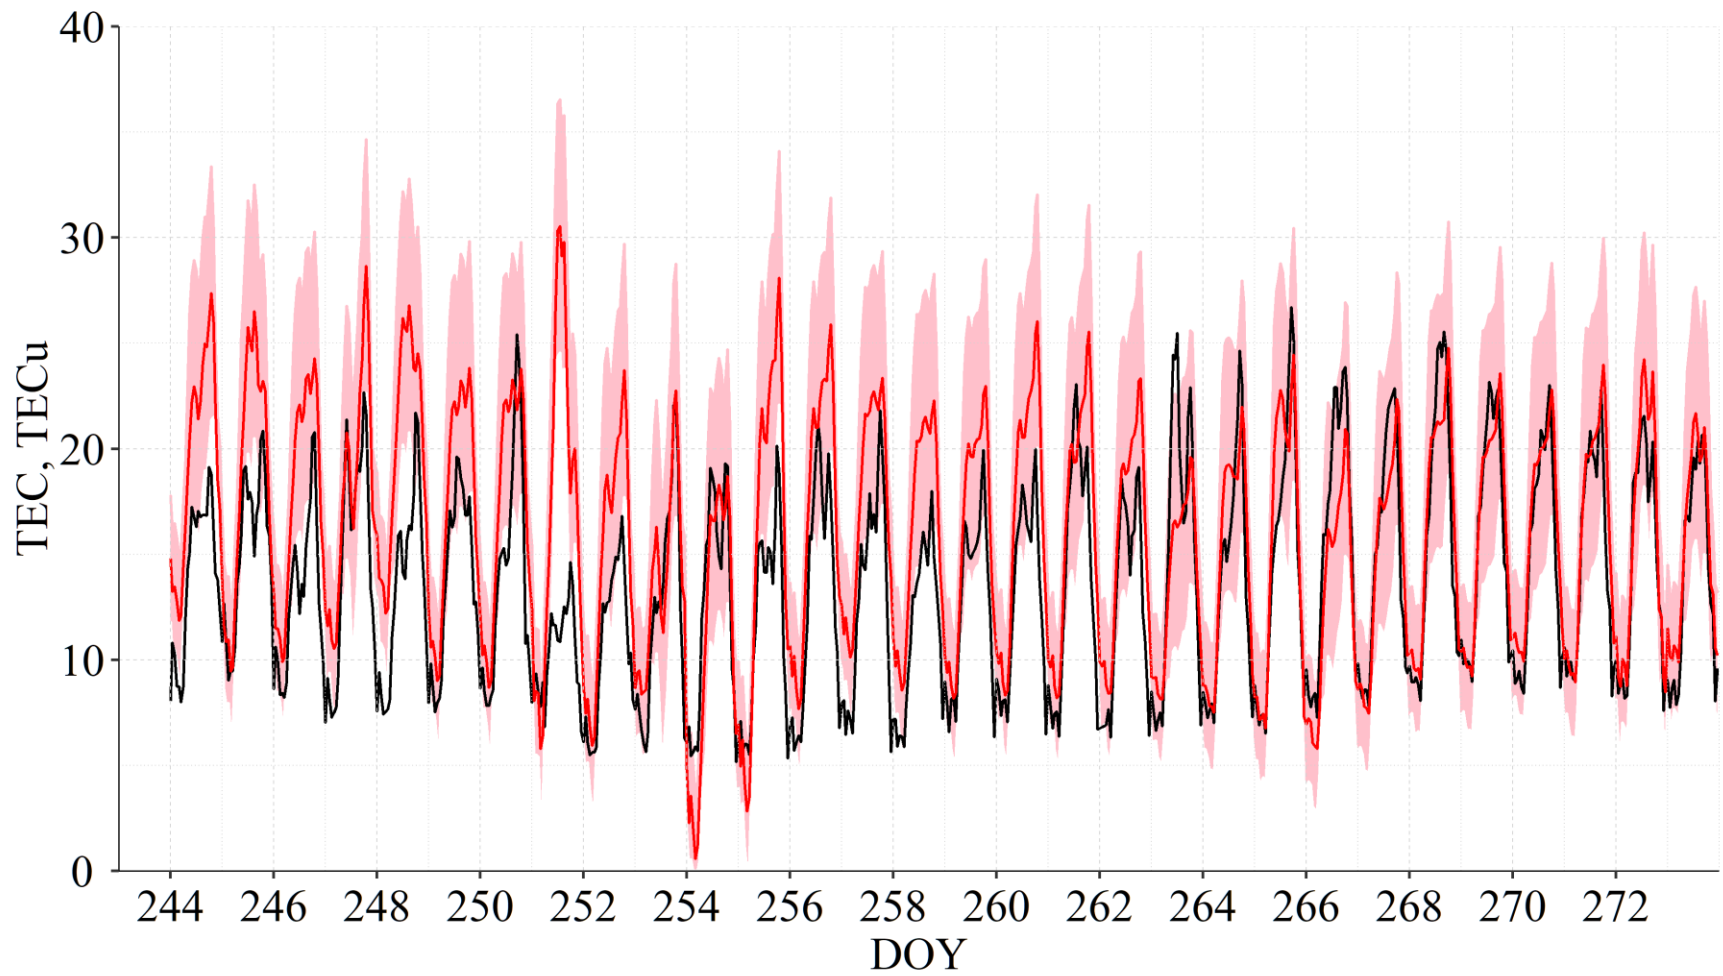

**Figure S16.** Observed (black) and forecasted using the PCA-MRM(L31, mean.lag1.2) model (red) TEC 1h series for September 2015; pink area shows 90% confidence interval.

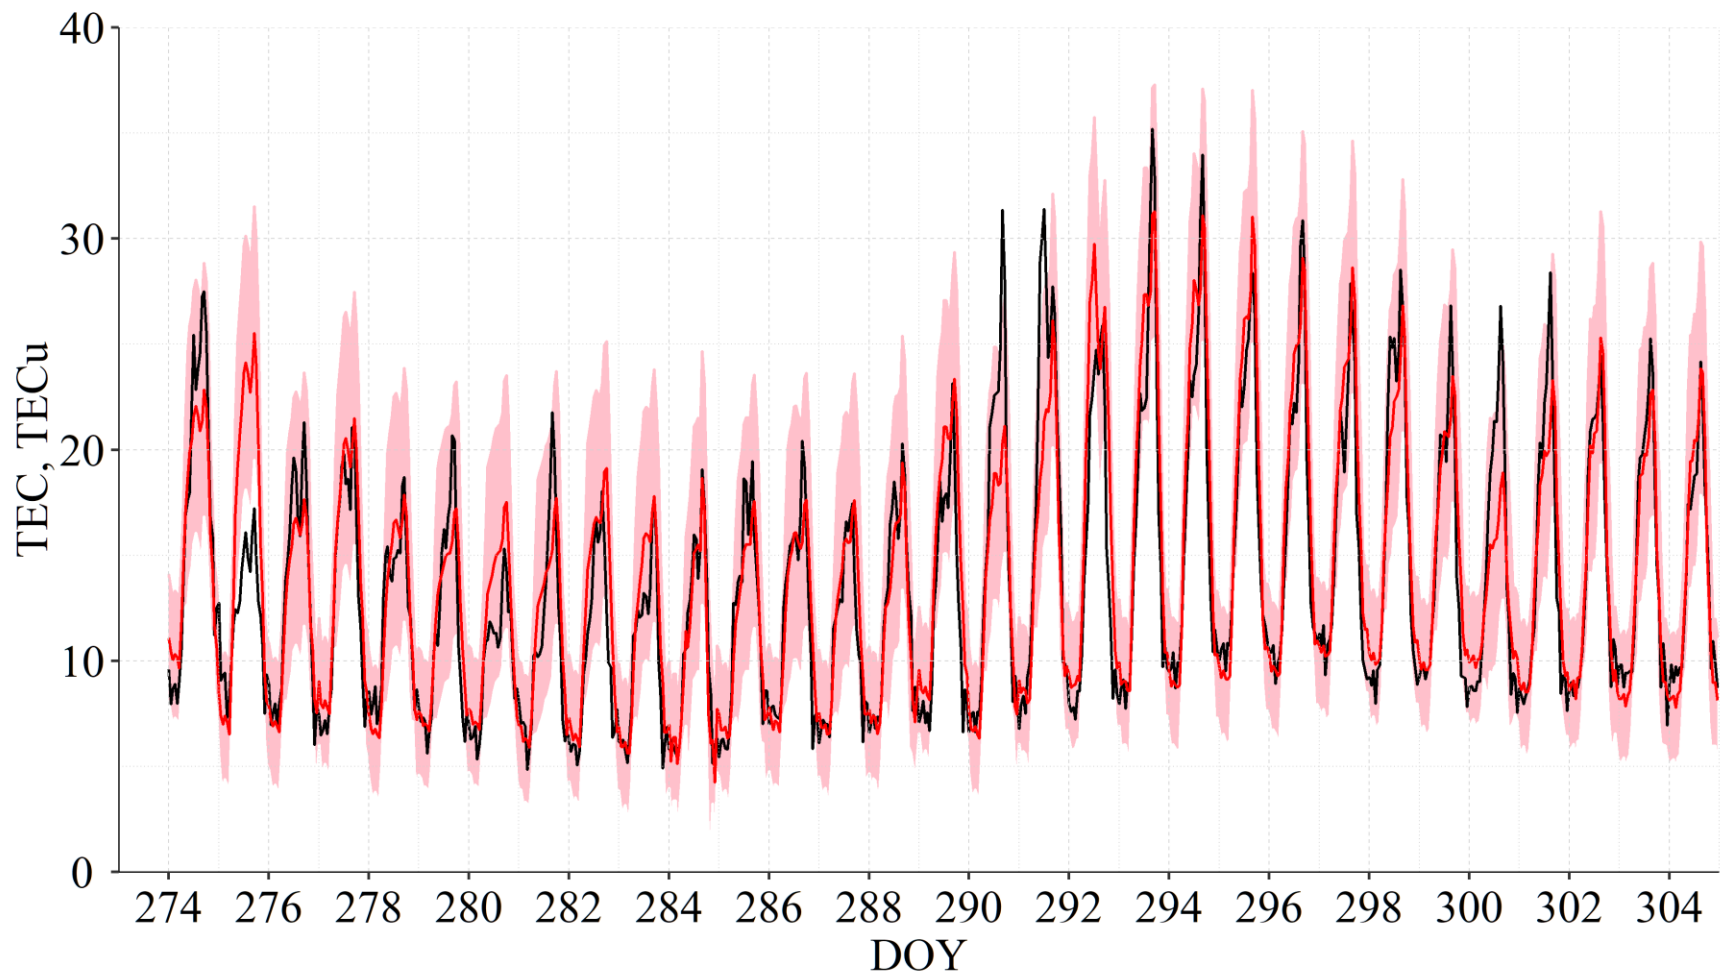

**Figure S17.** Observed (black) and forecasted using the PCA-MRM(L31, mean.lag1.2) model (red) TEC 1h series for October 2015; pink area shows 90% confidence interval.

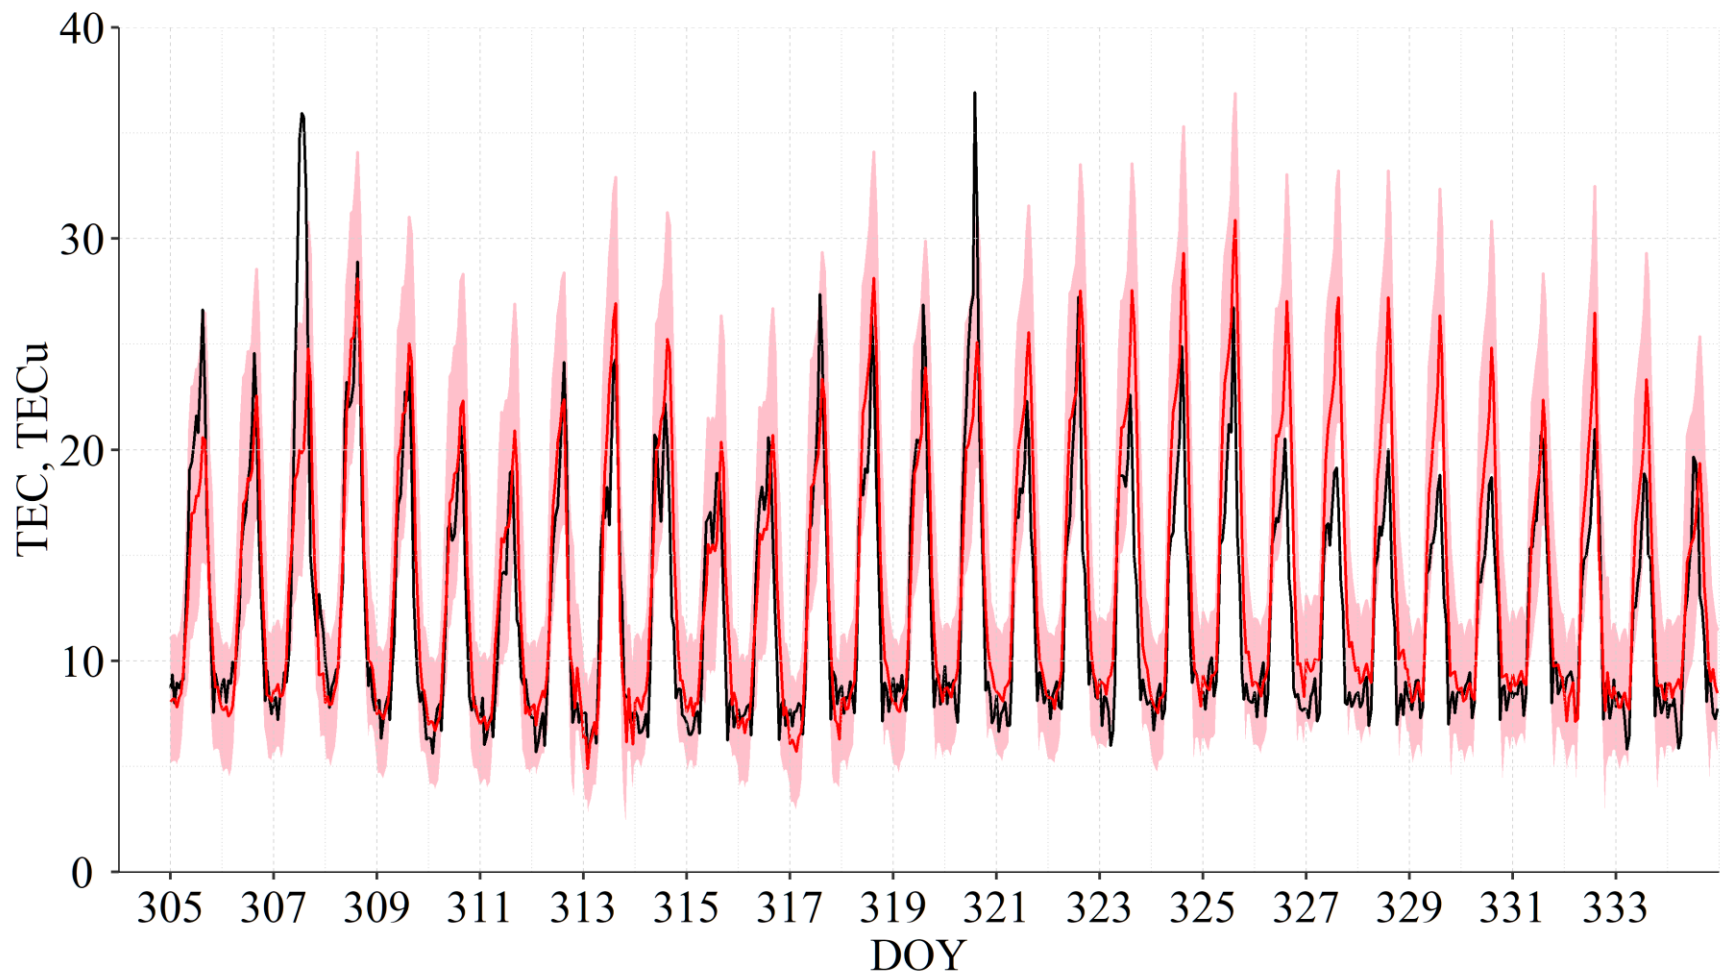

**Figure S18.** Observed (black) and forecasted using the PCA-MRM(L31, mean.lag1.2) model (red) TEC 1h series for November 2015; pink area shows 90% confidence interval.

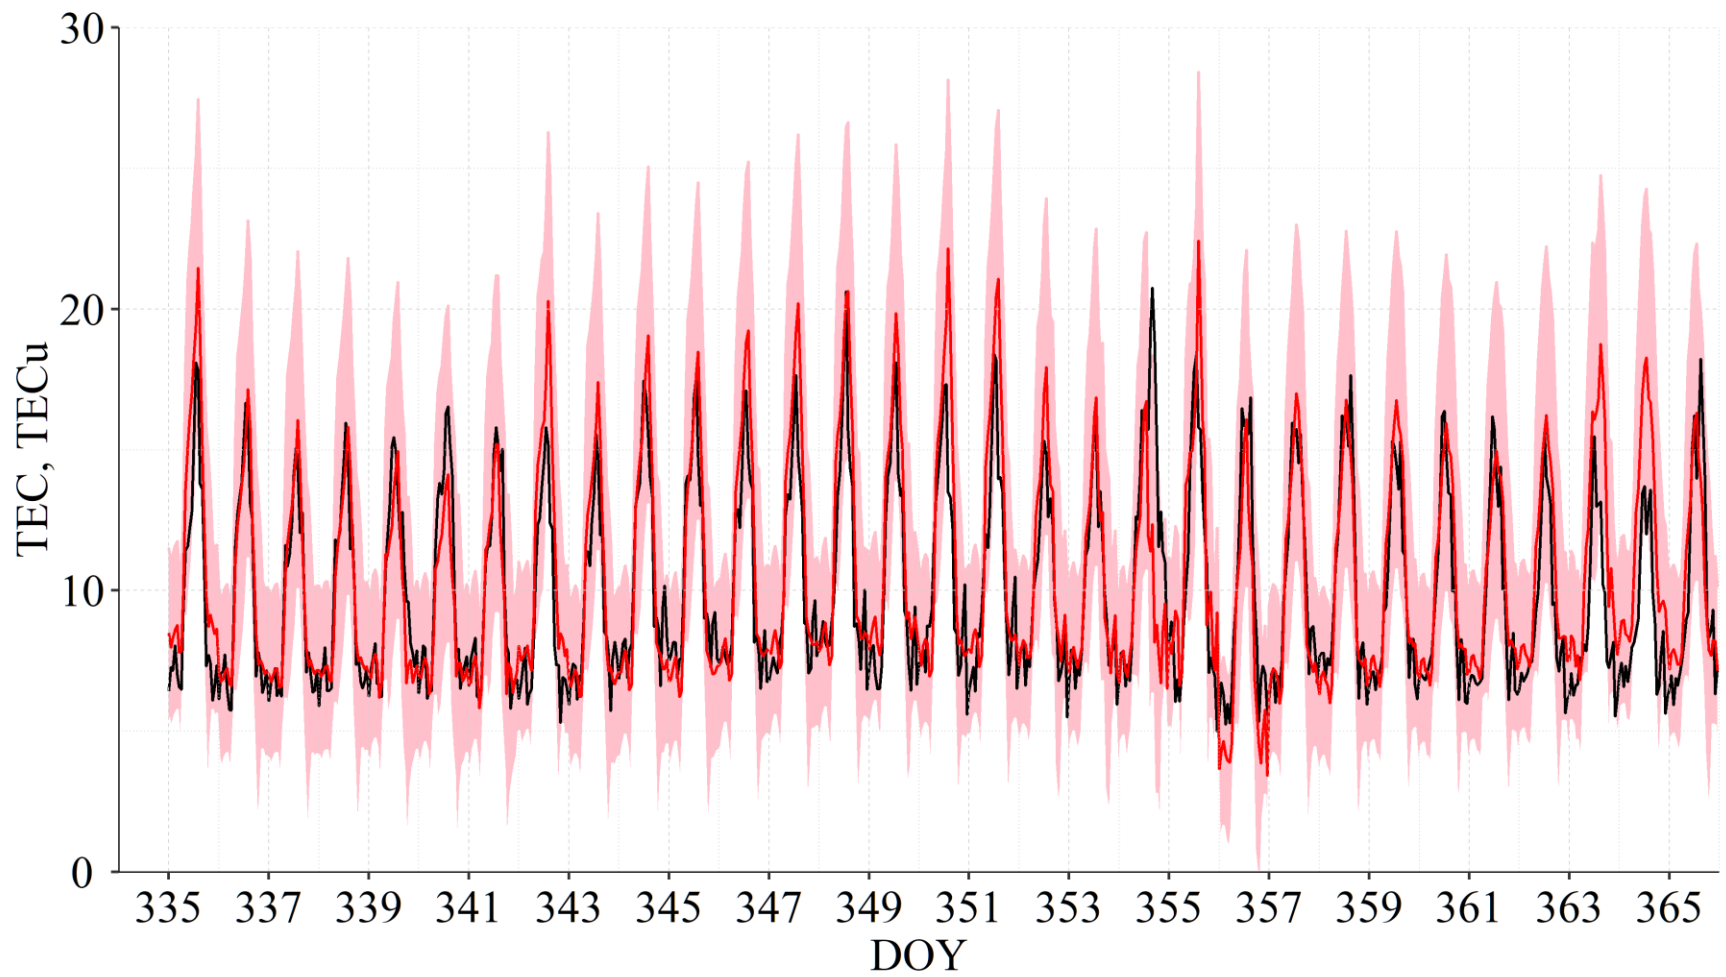

**Figure S19.** Observed (black) and forecasted using the PCA-MRM(L31, mean.lag1.2) model (red) TEC 1h series for December 2015; pink area shows 90% confidence interval.
