# Supplementary material
Source: MDPI journal article supplement (https://www.mdpi.com/2073-4433/13/2/323)

# Supplementary Materials

for

## PCA-MRM model to forecast TEC at middle latitudes

by

Anna L. Morozova <sup>1,\*</sup>, Teresa Barata <sup>2</sup> and Tatiana Barlyaeva <sup>3</sup>

<sup>1</sup> Instituto de Astrofísica e Ciências do Espaço, Univ Coimbra, OGAUC, Coimbra, Portugal; [annamorozovauc@gmail.com](mailto:annamorozovauc@gmail.com)

<sup>2</sup> Instituto de Astrofísica e Ciências do Espaço, Univ Coimbra, OGAUC, Coimbra, Portugal; [mtbarata@gmail.com](mailto:mtbarata@gmail.com)

<sup>3</sup> Instituto de Astrofísica e Ciências do Espaço, Univ Coimbra, OGAUC, Coimbra, Portugal; [tvbarlyaeva@gmail.com](mailto:tvbarlyaeva@gmail.com)

\* Correspondence: [annamorozovauc@gmail.com](mailto:annamorozovauc@gmail.com)

This file contains Supplementary Materials (SM) referenced in the main text:

**Figures S7-S8:** Scores of PCA-MRM models with different L values for 1h TEC, 1d mean and 1d max TEC series, respectively.

**Figure S7.** Scores of PCA-MRM models with different L values for 1h TEC: correlation coefficients between the observed and forecasted series (a),  $R^2$  (b), RMSE (c) and MAE (d). Metrics for the models with lags of 1 and 2 days and for the models constructed as the arithmetic mean of the forecasts with lags of 1 and 2 days (“mean1.2”) are shown.

a)

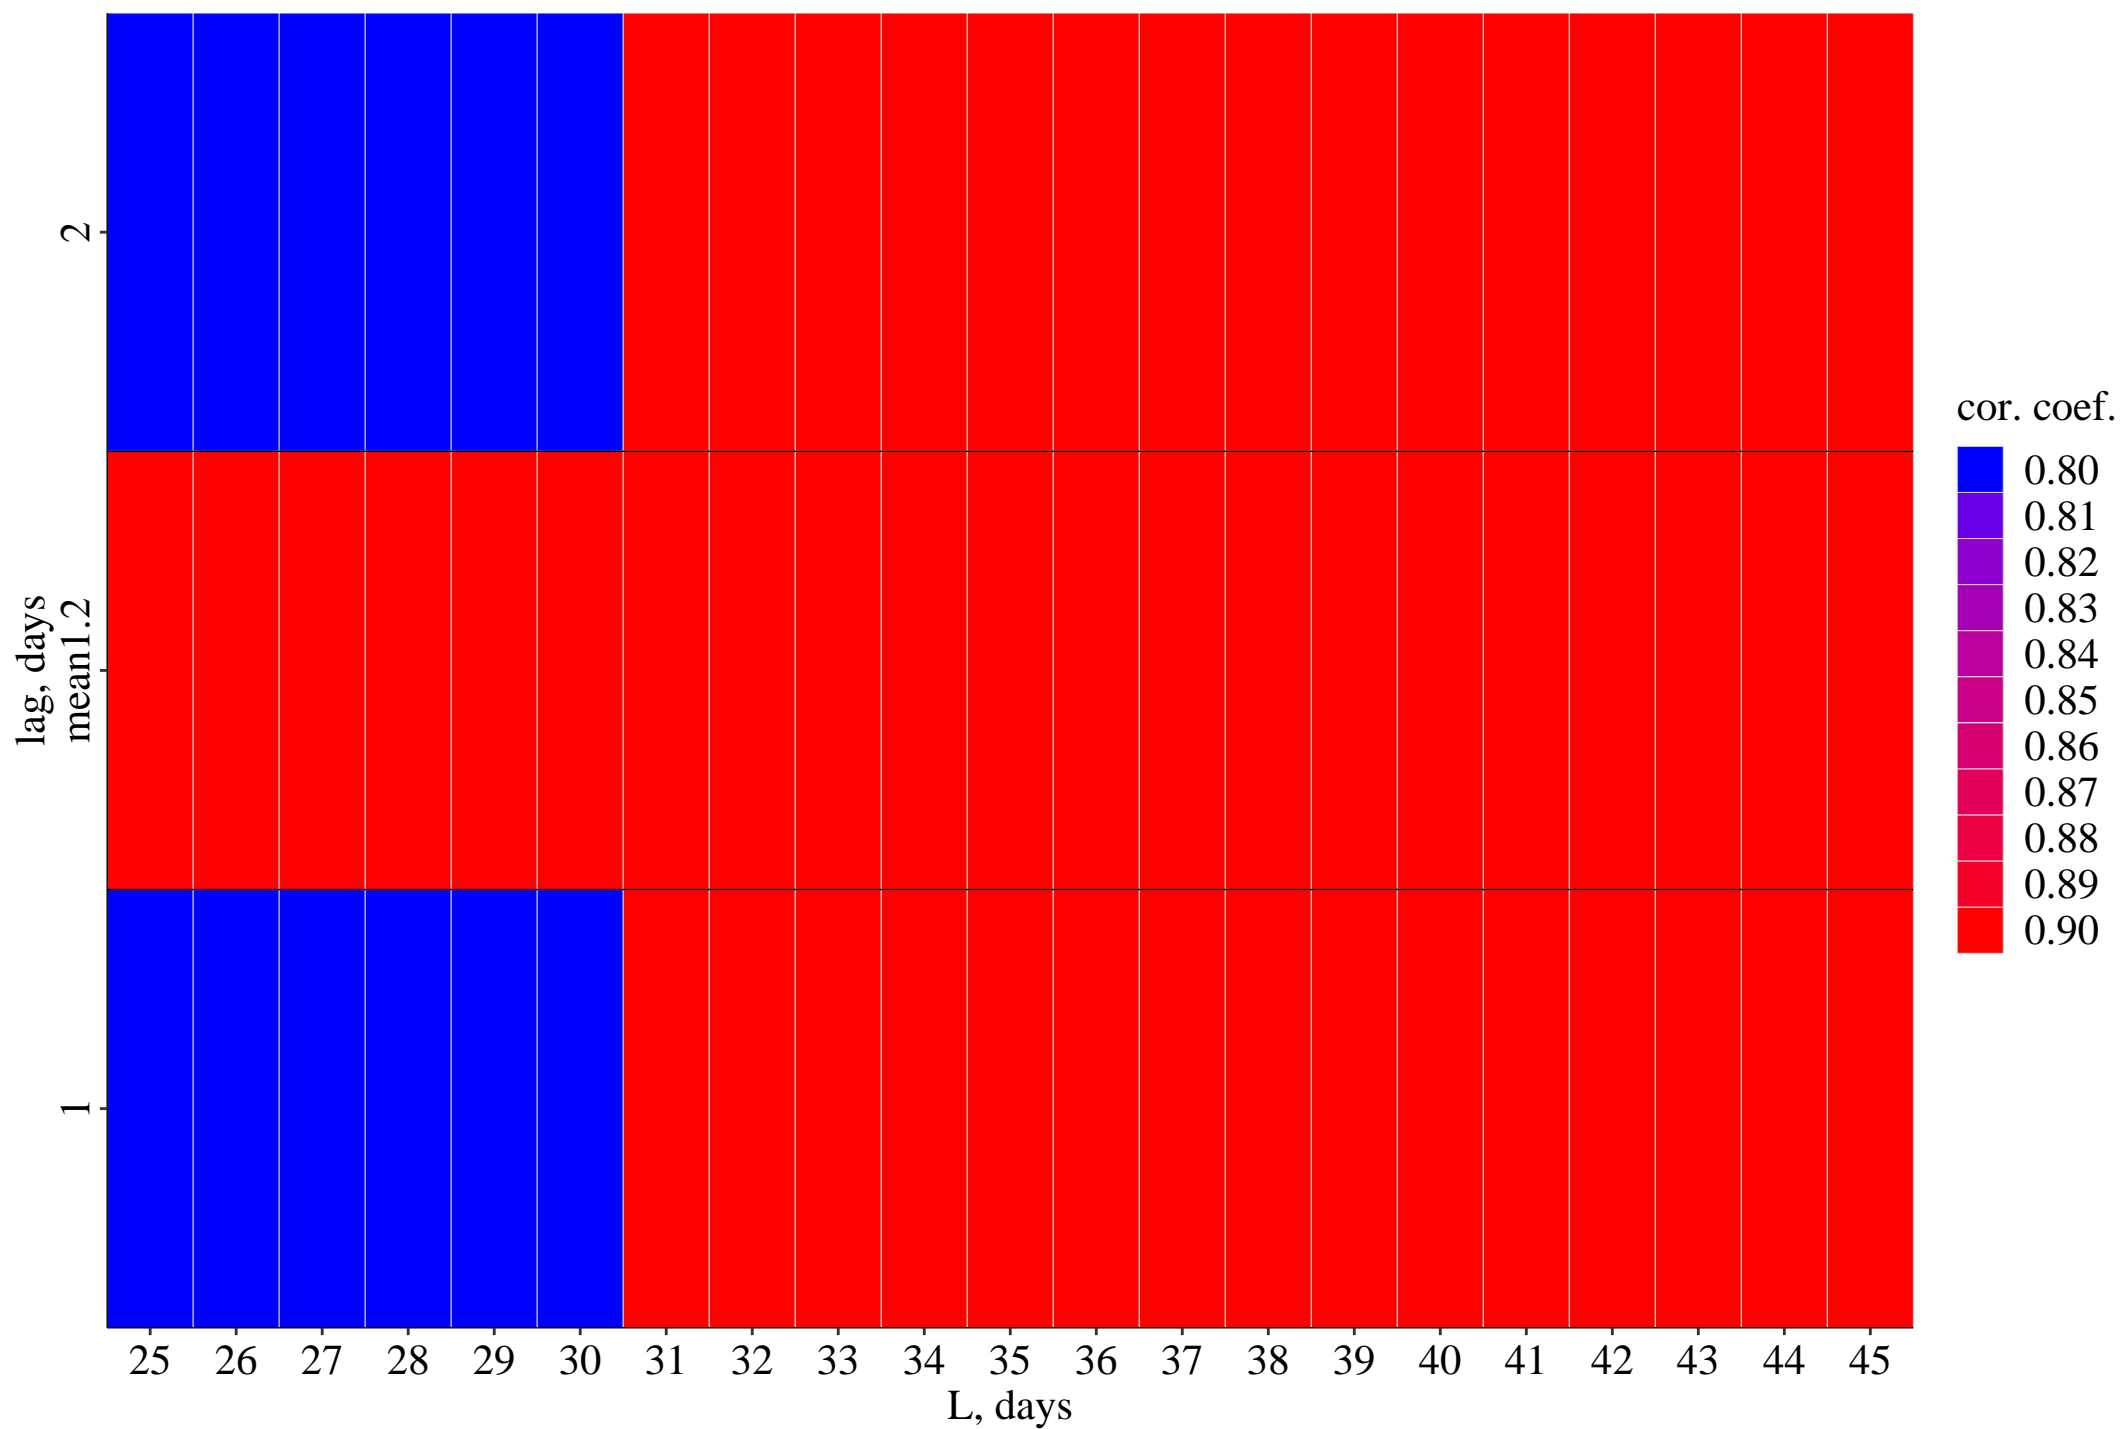

b)

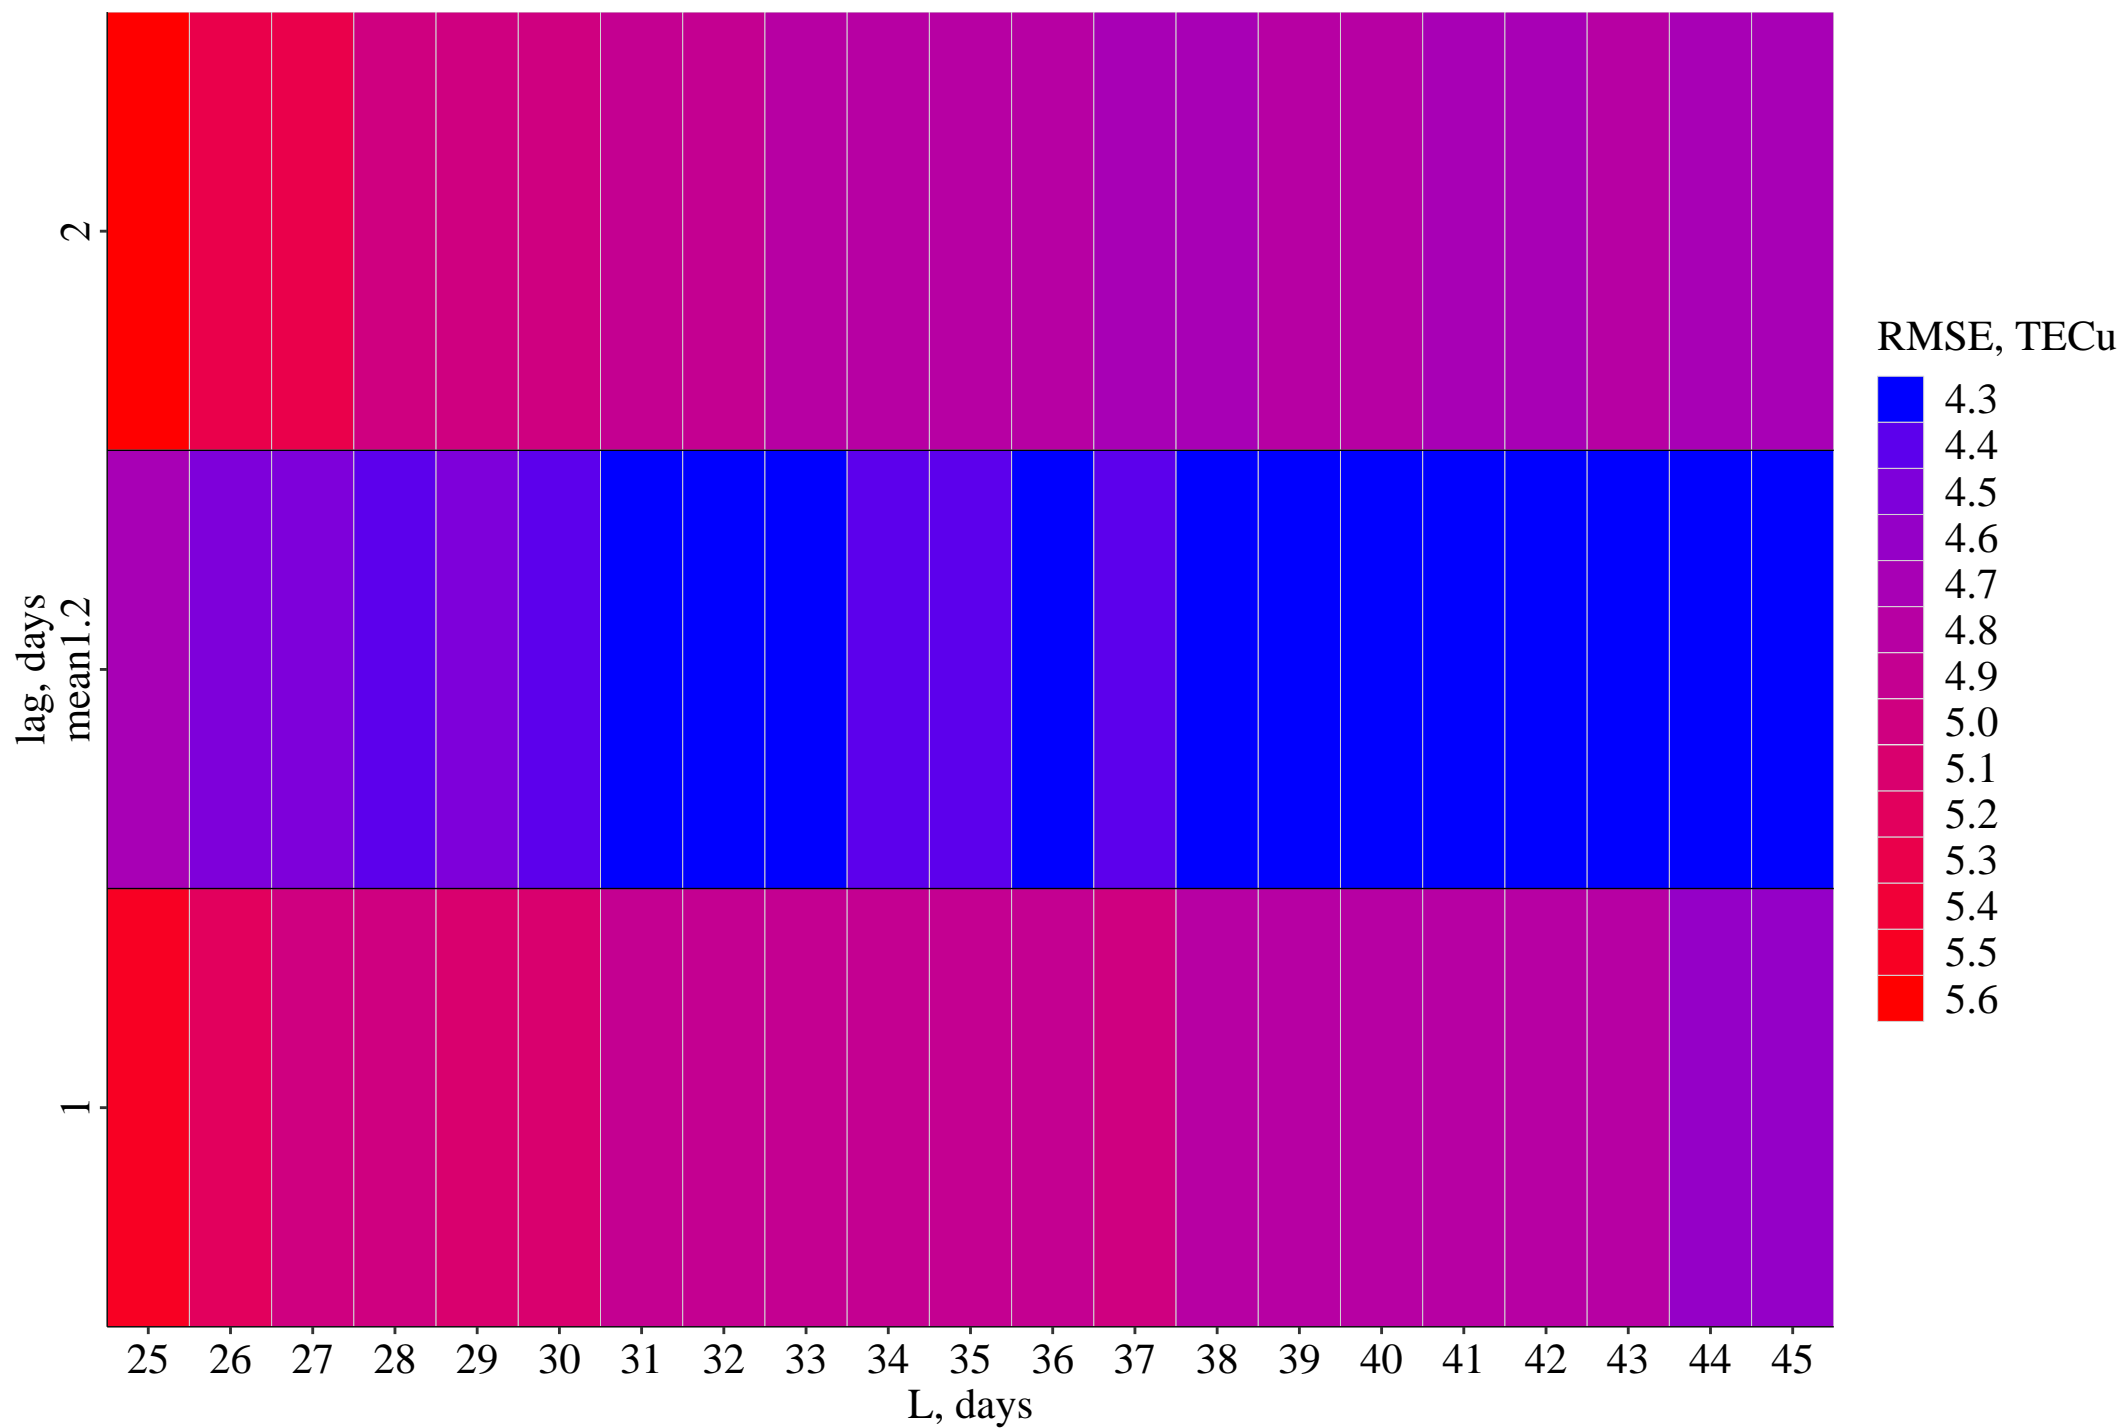

c)

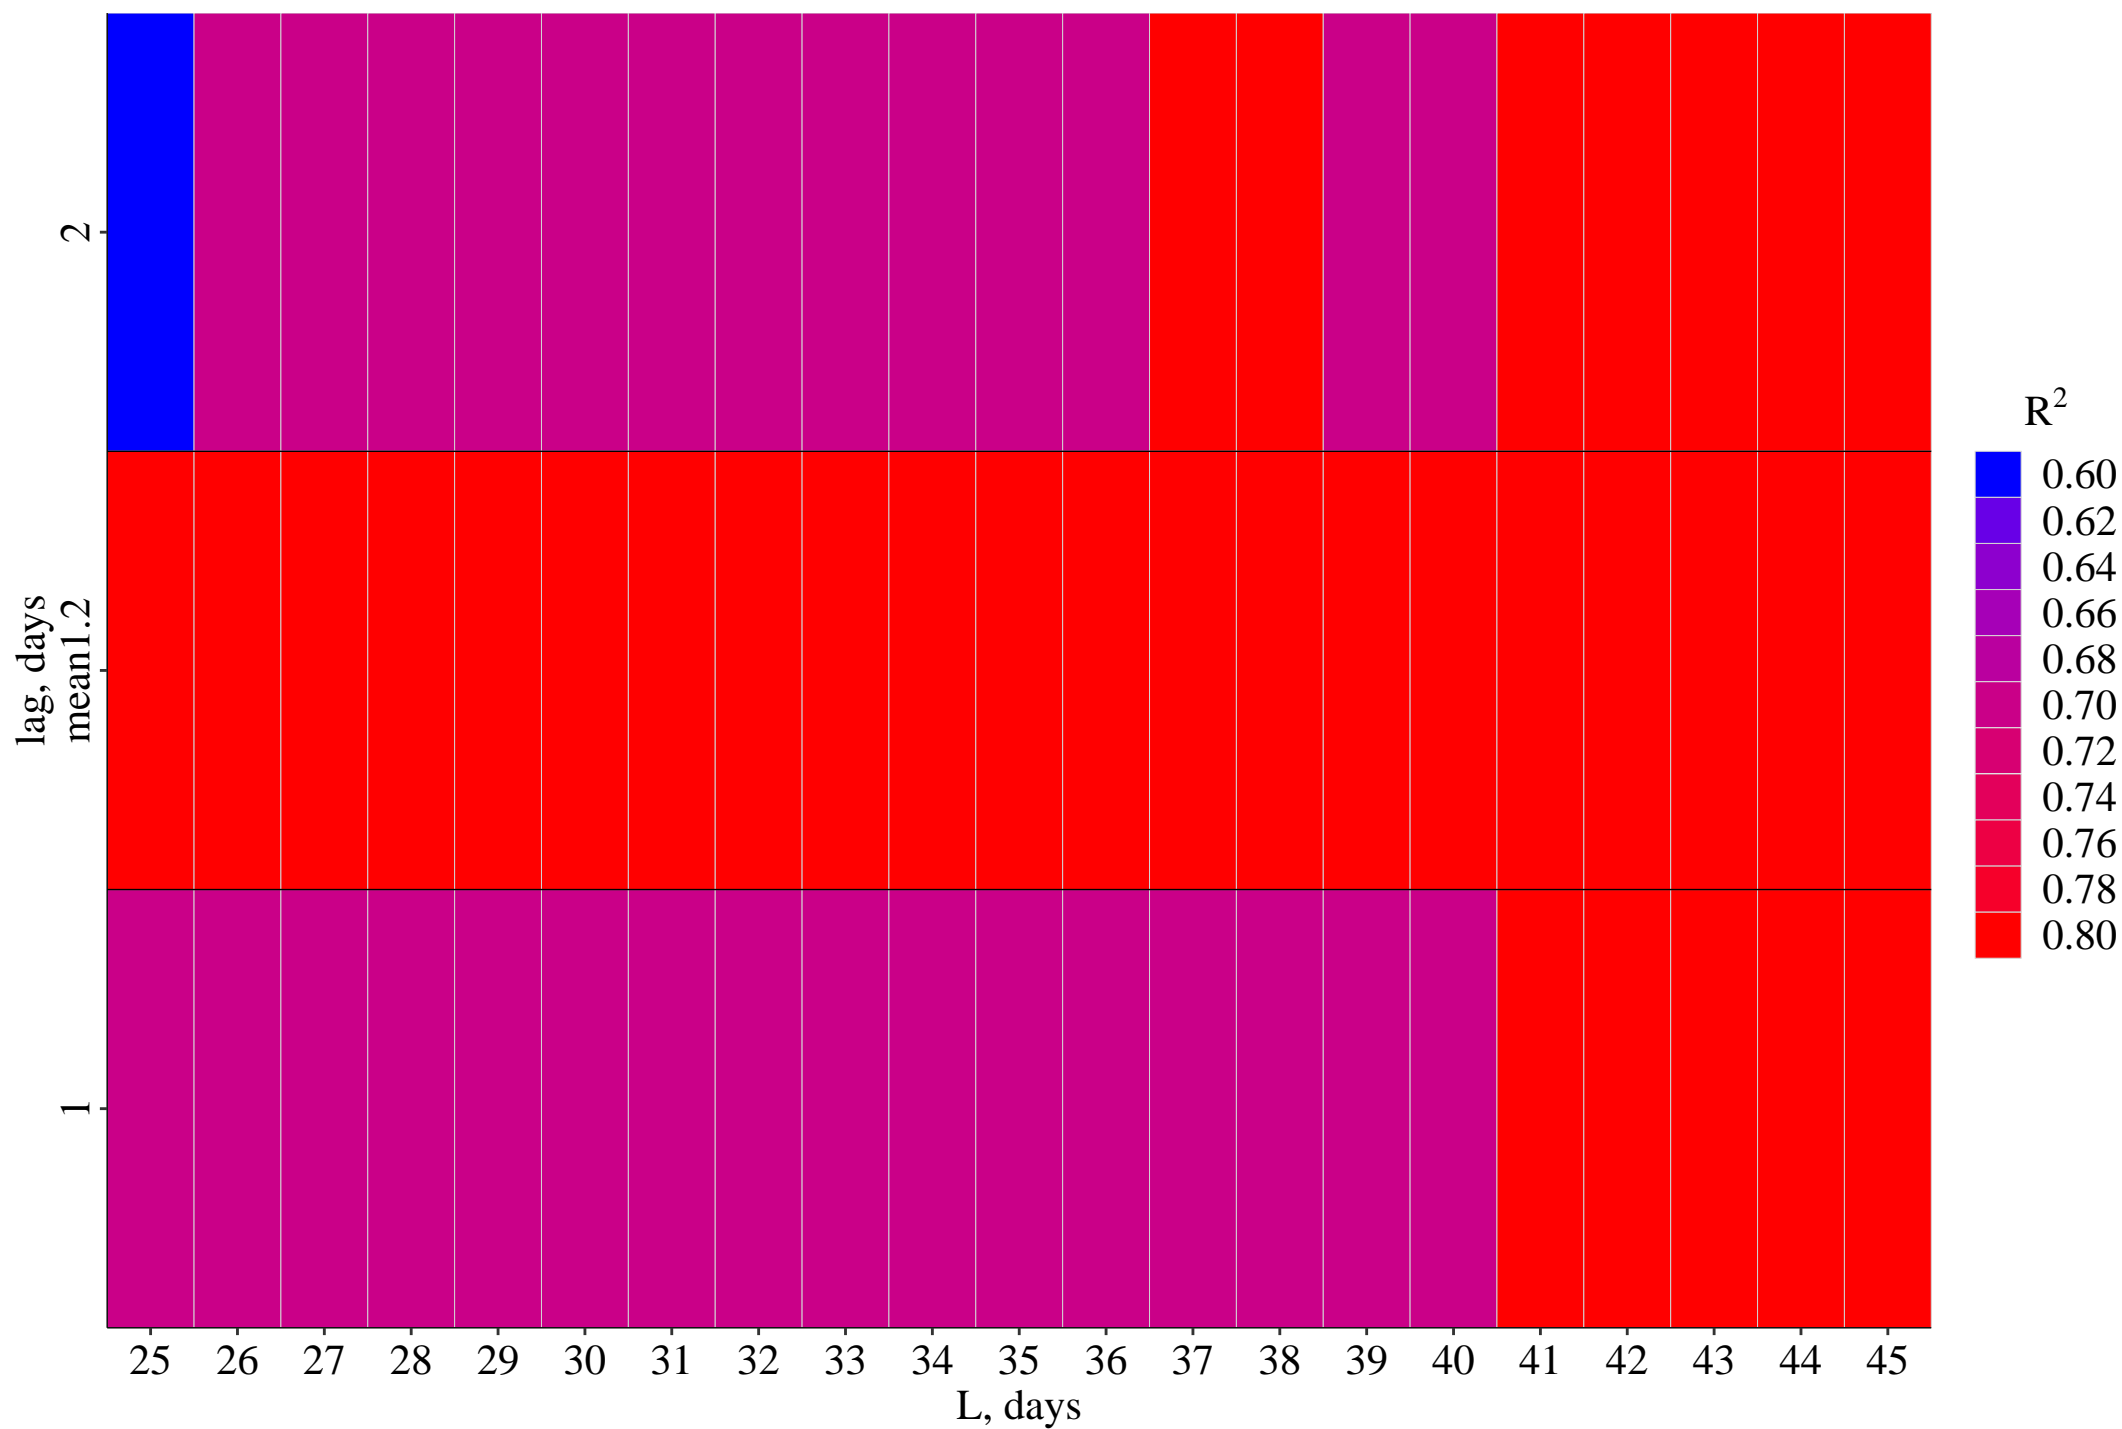

d)

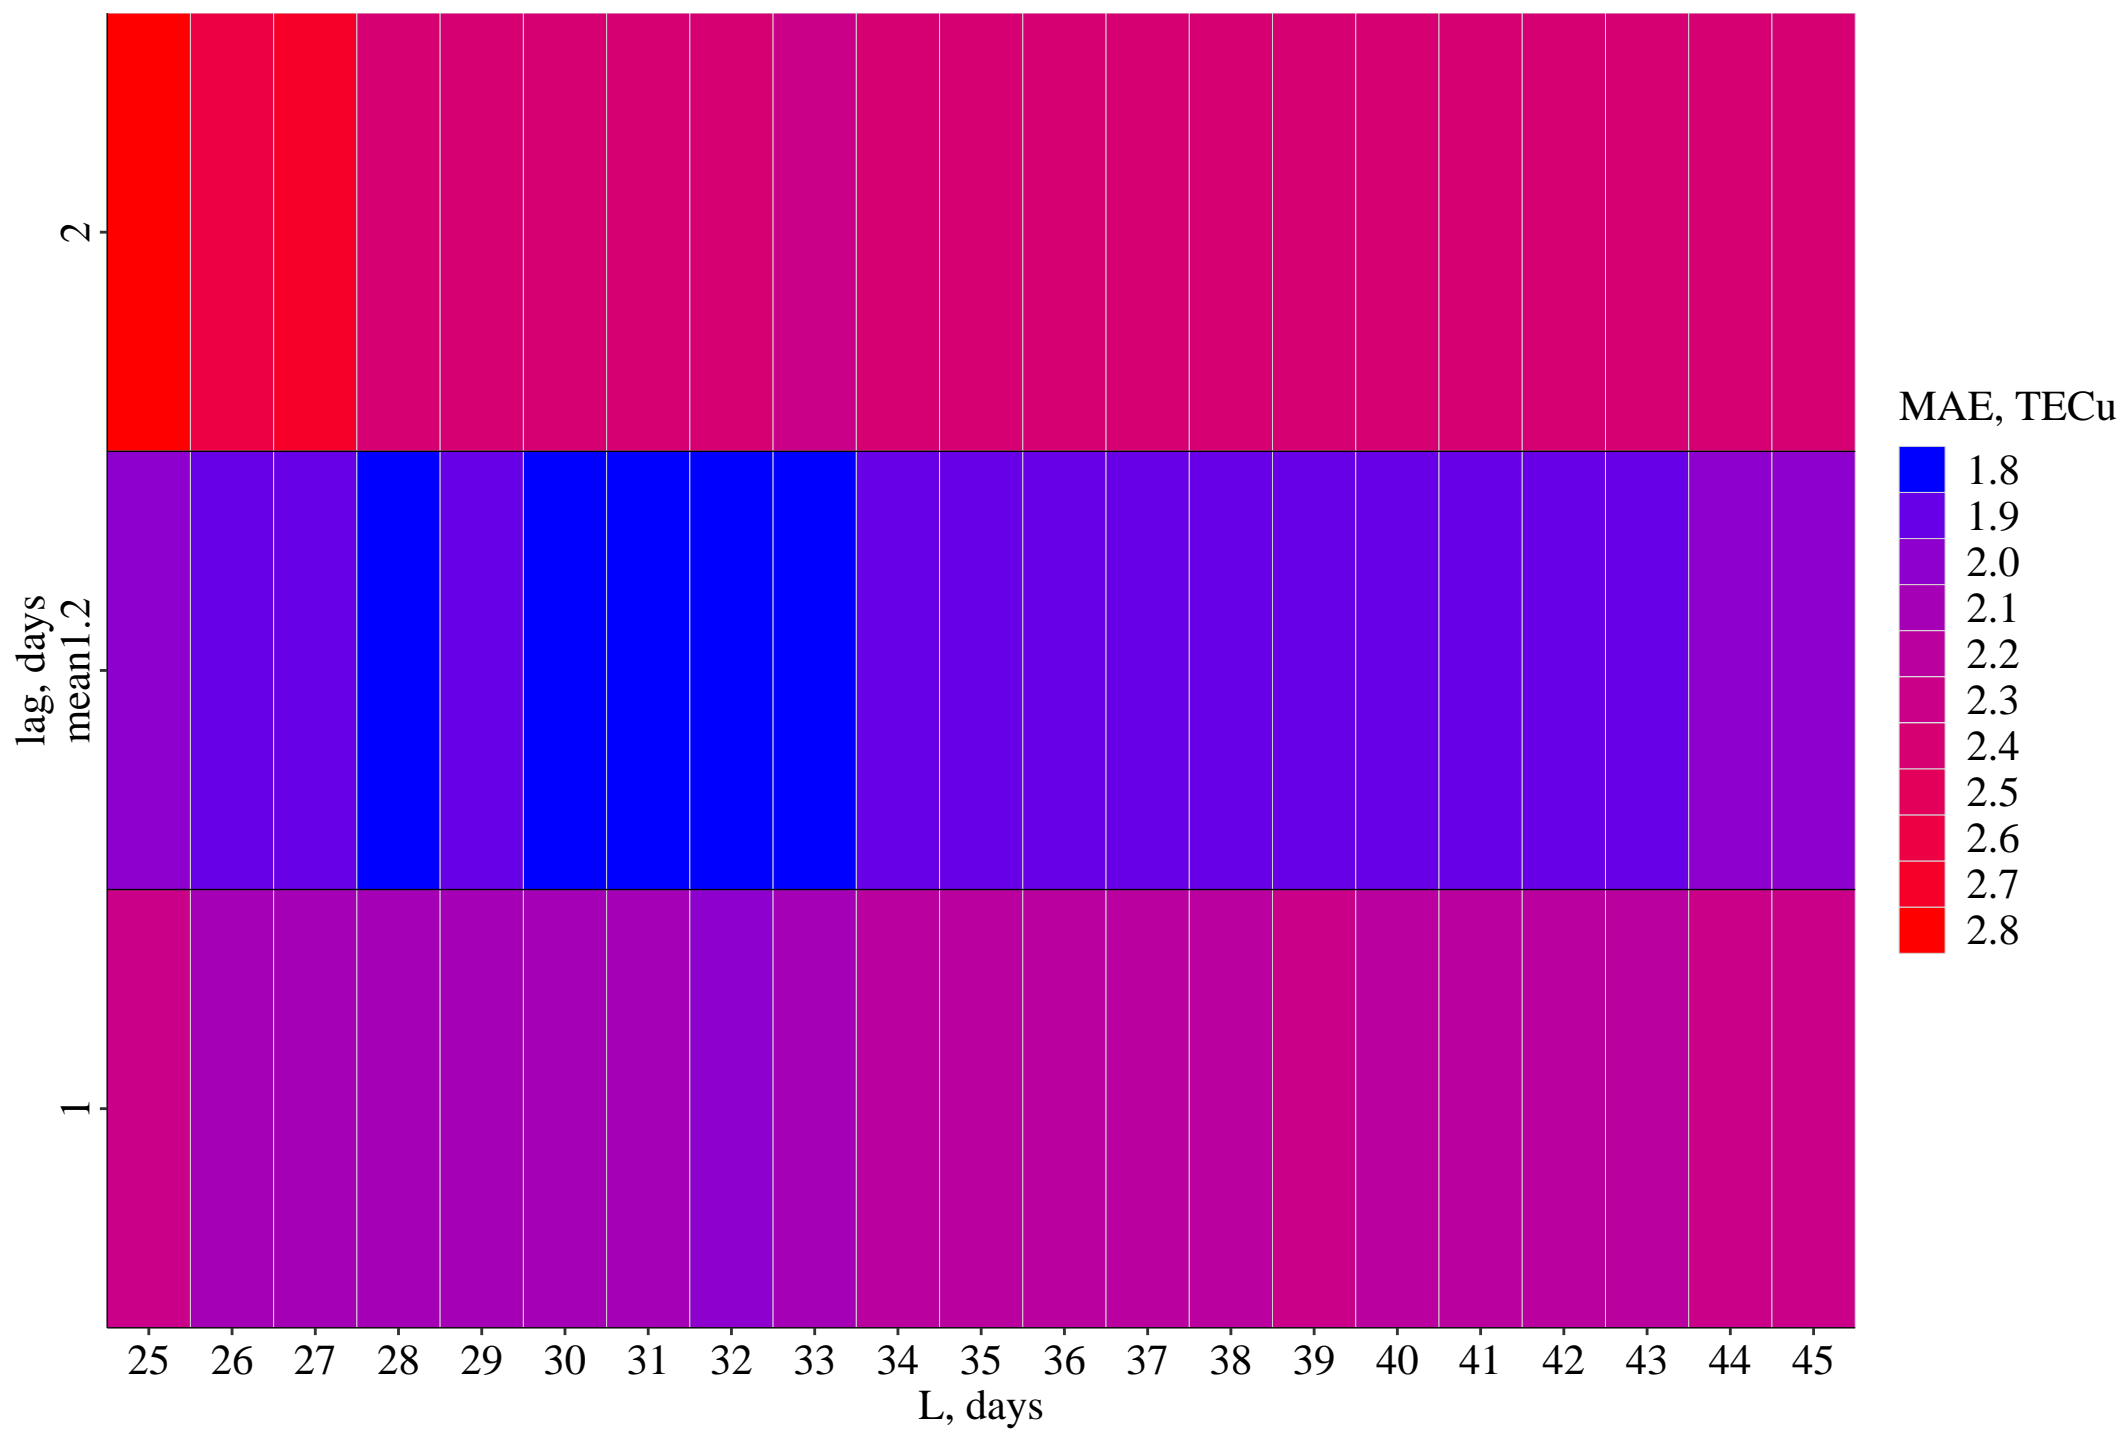

**Figure S8.** Scores of PCA-MRM models with different L values for 1d mean (a-b) and 1d max TEC (c): correlation coefficients between the observed and forecasted series (a) and MAE (b-c). Metrics for the models with lags of 1 and 2 days and for the models constructed as the arithmetic mean of the forecasts with lags of 1 and 2 days (“mean1.2”) are shown.

a)

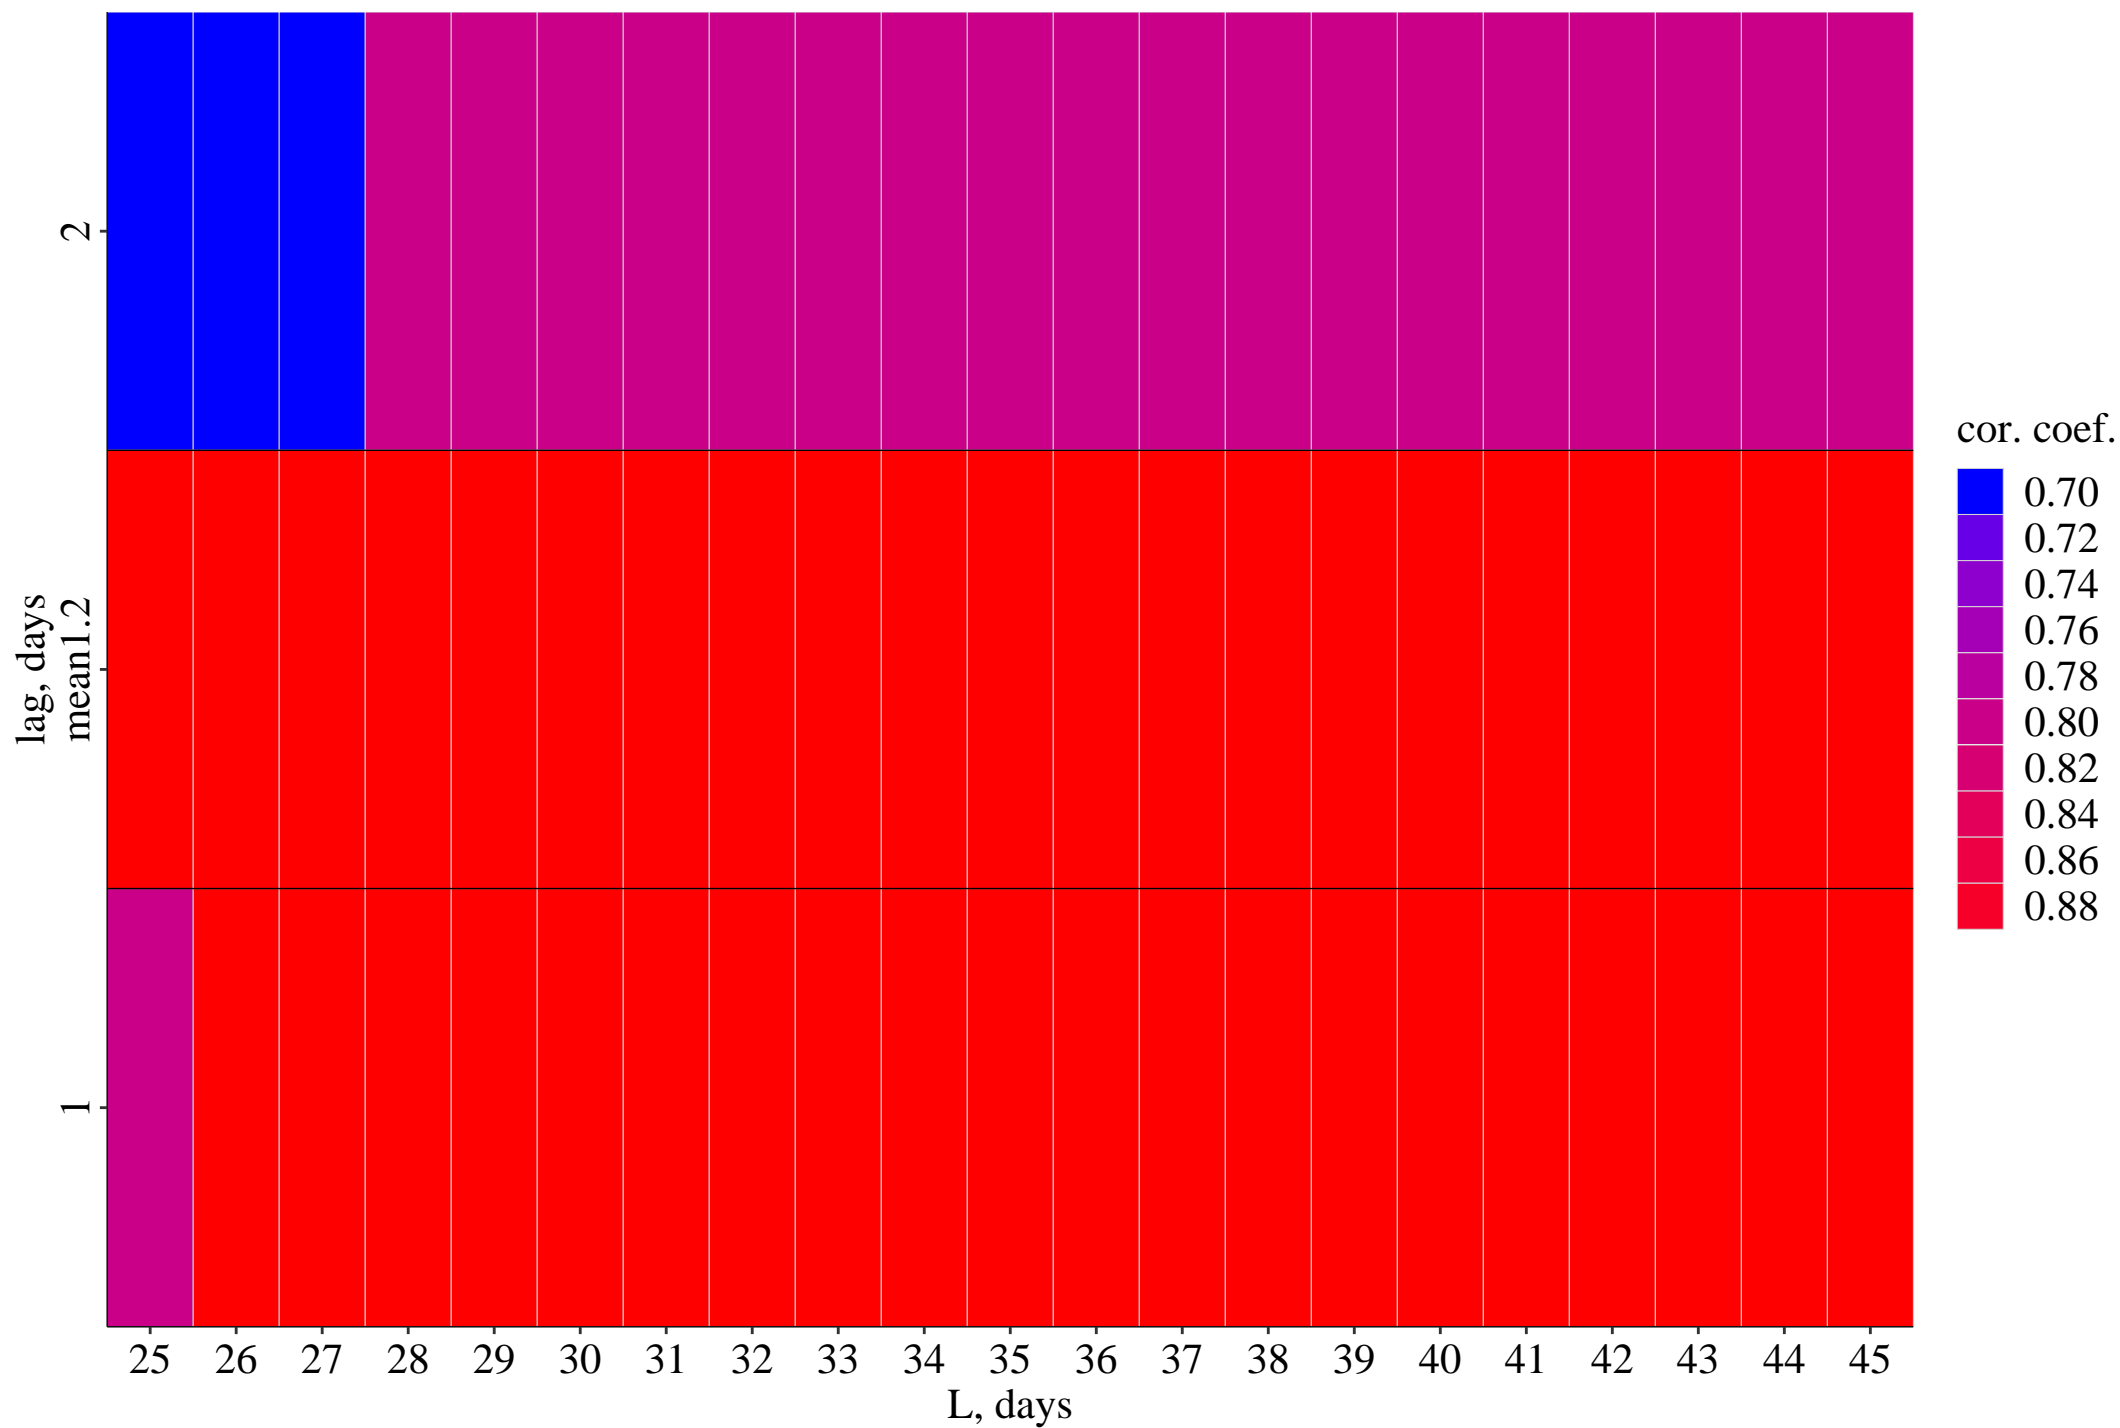

b)

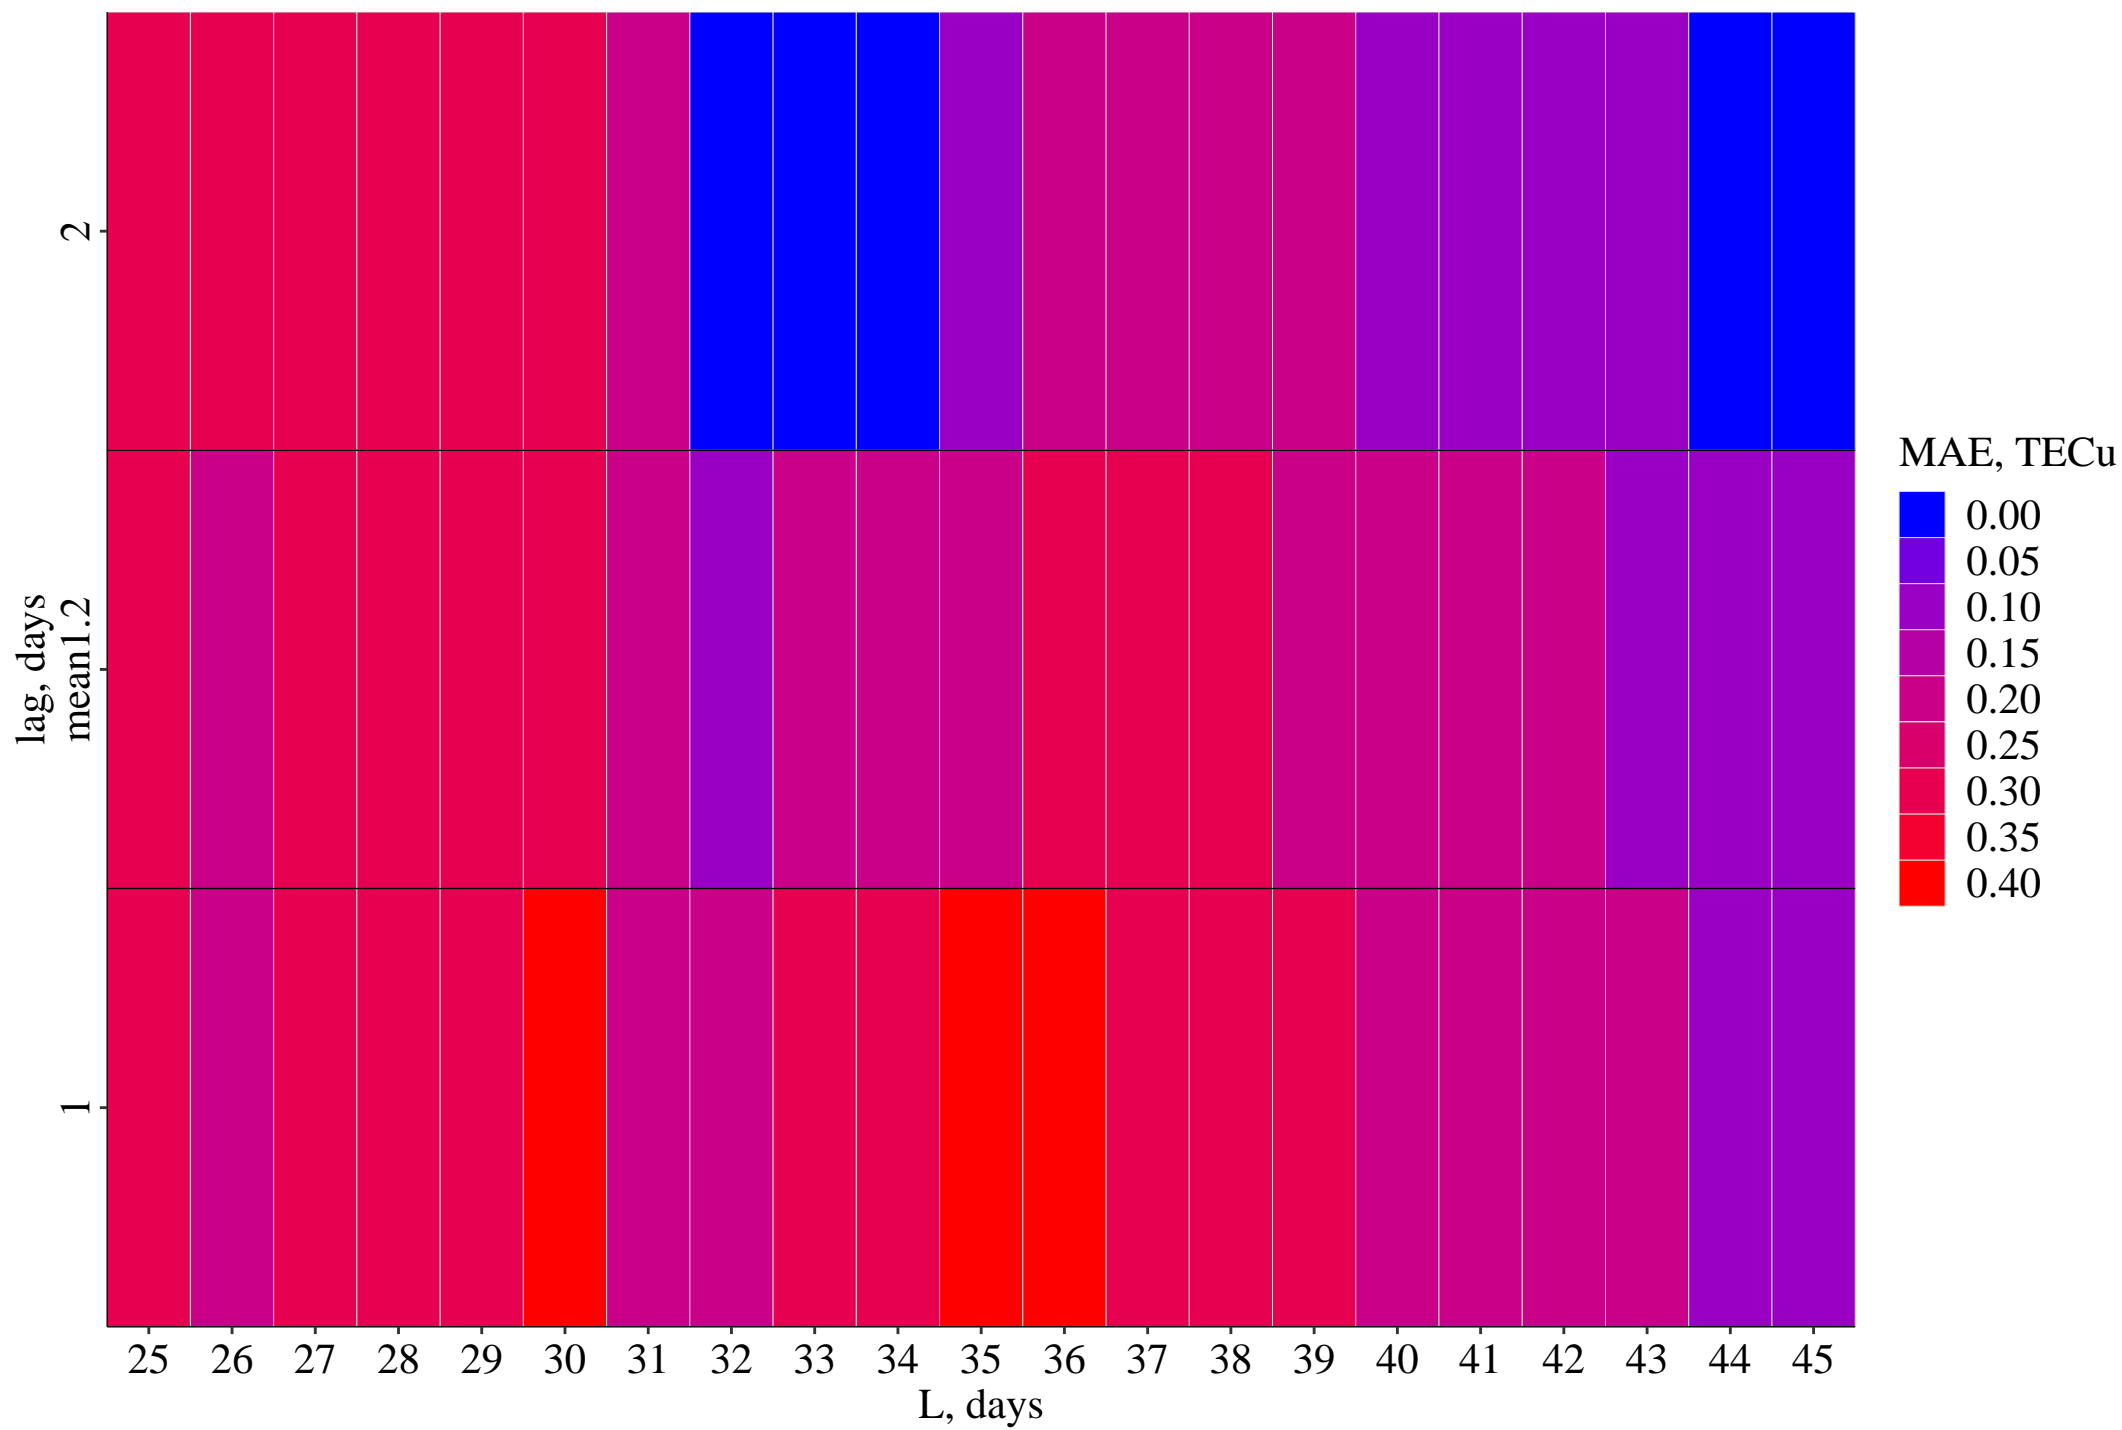

c)

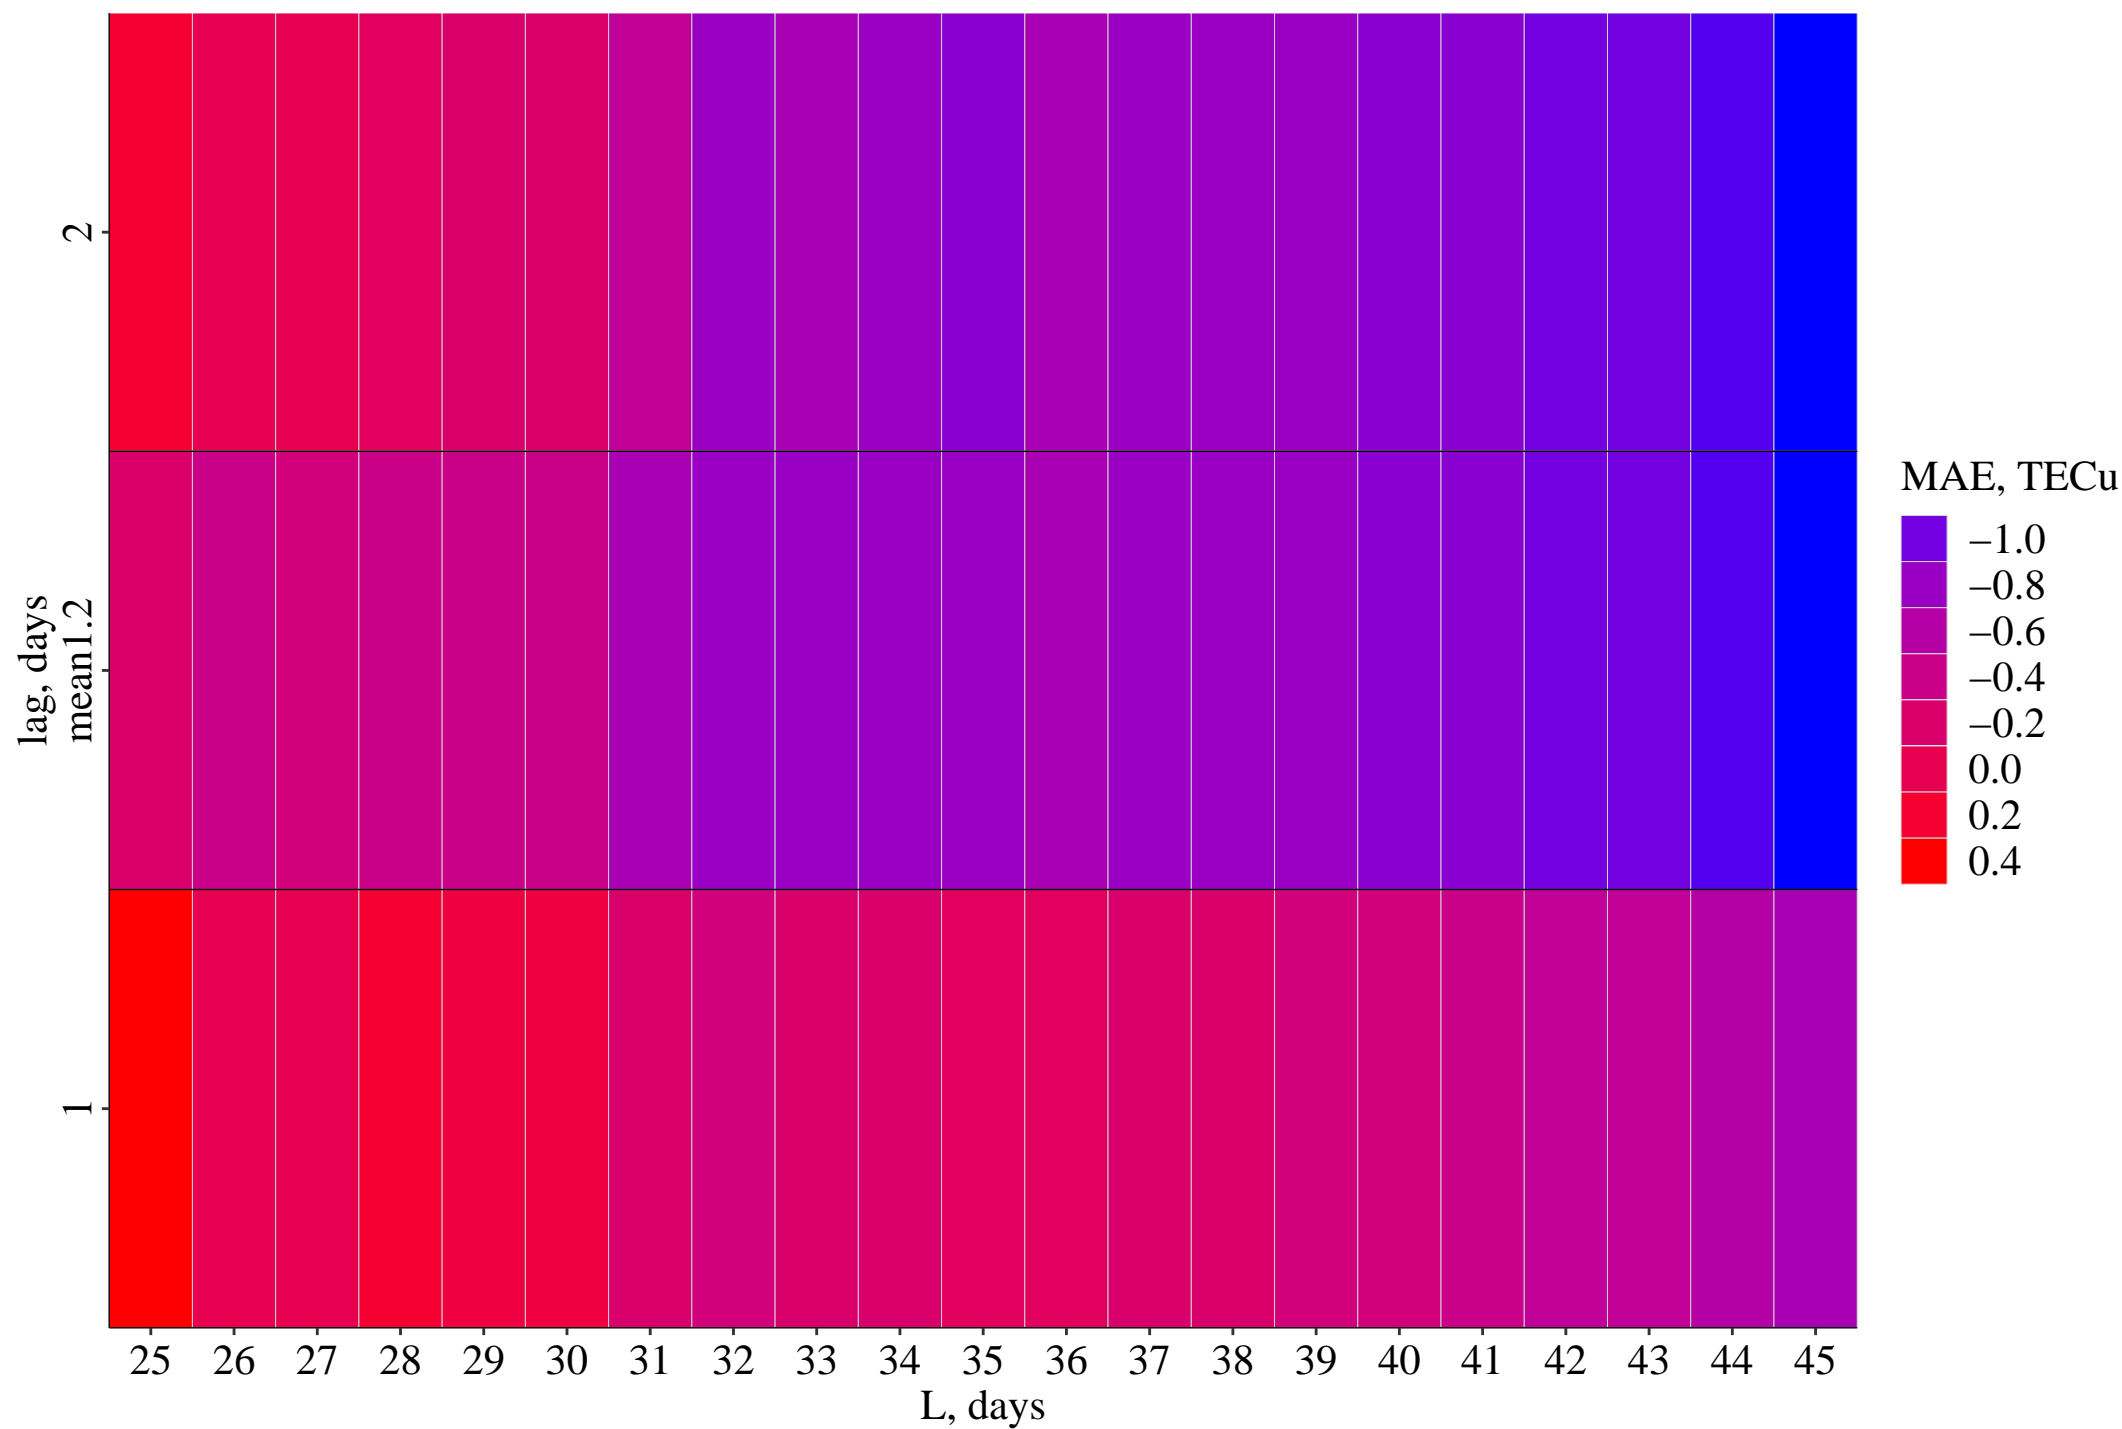

Supplement: s1 [file s1 › PCA-MRM_MDPI-Atmo_SI_Revision2_SeparateFiles_S7-S8_wFigures_v2.pdf]
