# Supplementary material
Source: MDPI journal article supplement (https://www.mdpi.com/2073-4433/13/2/323)

# Supplementary Materials

for

## PCA-MRM model to forecast TEC at middle latitudes

by

Anna L. Morozova <sup>1,\*</sup>, Teresa Barata <sup>2</sup> and Tatiana Barlyaeva <sup>3</sup>

<sup>1</sup> Instituto de Astrofísica e Ciências do Espaço, Univ Coimbra, OGAUC, Coimbra, Portugal; [annamorozovauc@gmail.com](mailto:annamorozovauc@gmail.com)

<sup>2</sup> Instituto de Astrofísica e Ciências do Espaço, Univ Coimbra, OGAUC, Coimbra, Portugal; [mtbarata@gmail.com](mailto:mtbarata@gmail.com)

<sup>3</sup> Instituto de Astrofísica e Ciências do Espaço, Univ Coimbra, OGAUC, Coimbra, Portugal; [tvbarlyaeva@gmail.com](mailto:tvbarlyaeva@gmail.com)

\* Correspondence: [annamorozovauc@gmail.com](mailto:annamorozovauc@gmail.com)

This file contains Supplementary Materials (SM) referenced in the main text:

**Figure S6.** Examples of PC1 (a) and PC2 (b) of the TEC variations for months from January to December.

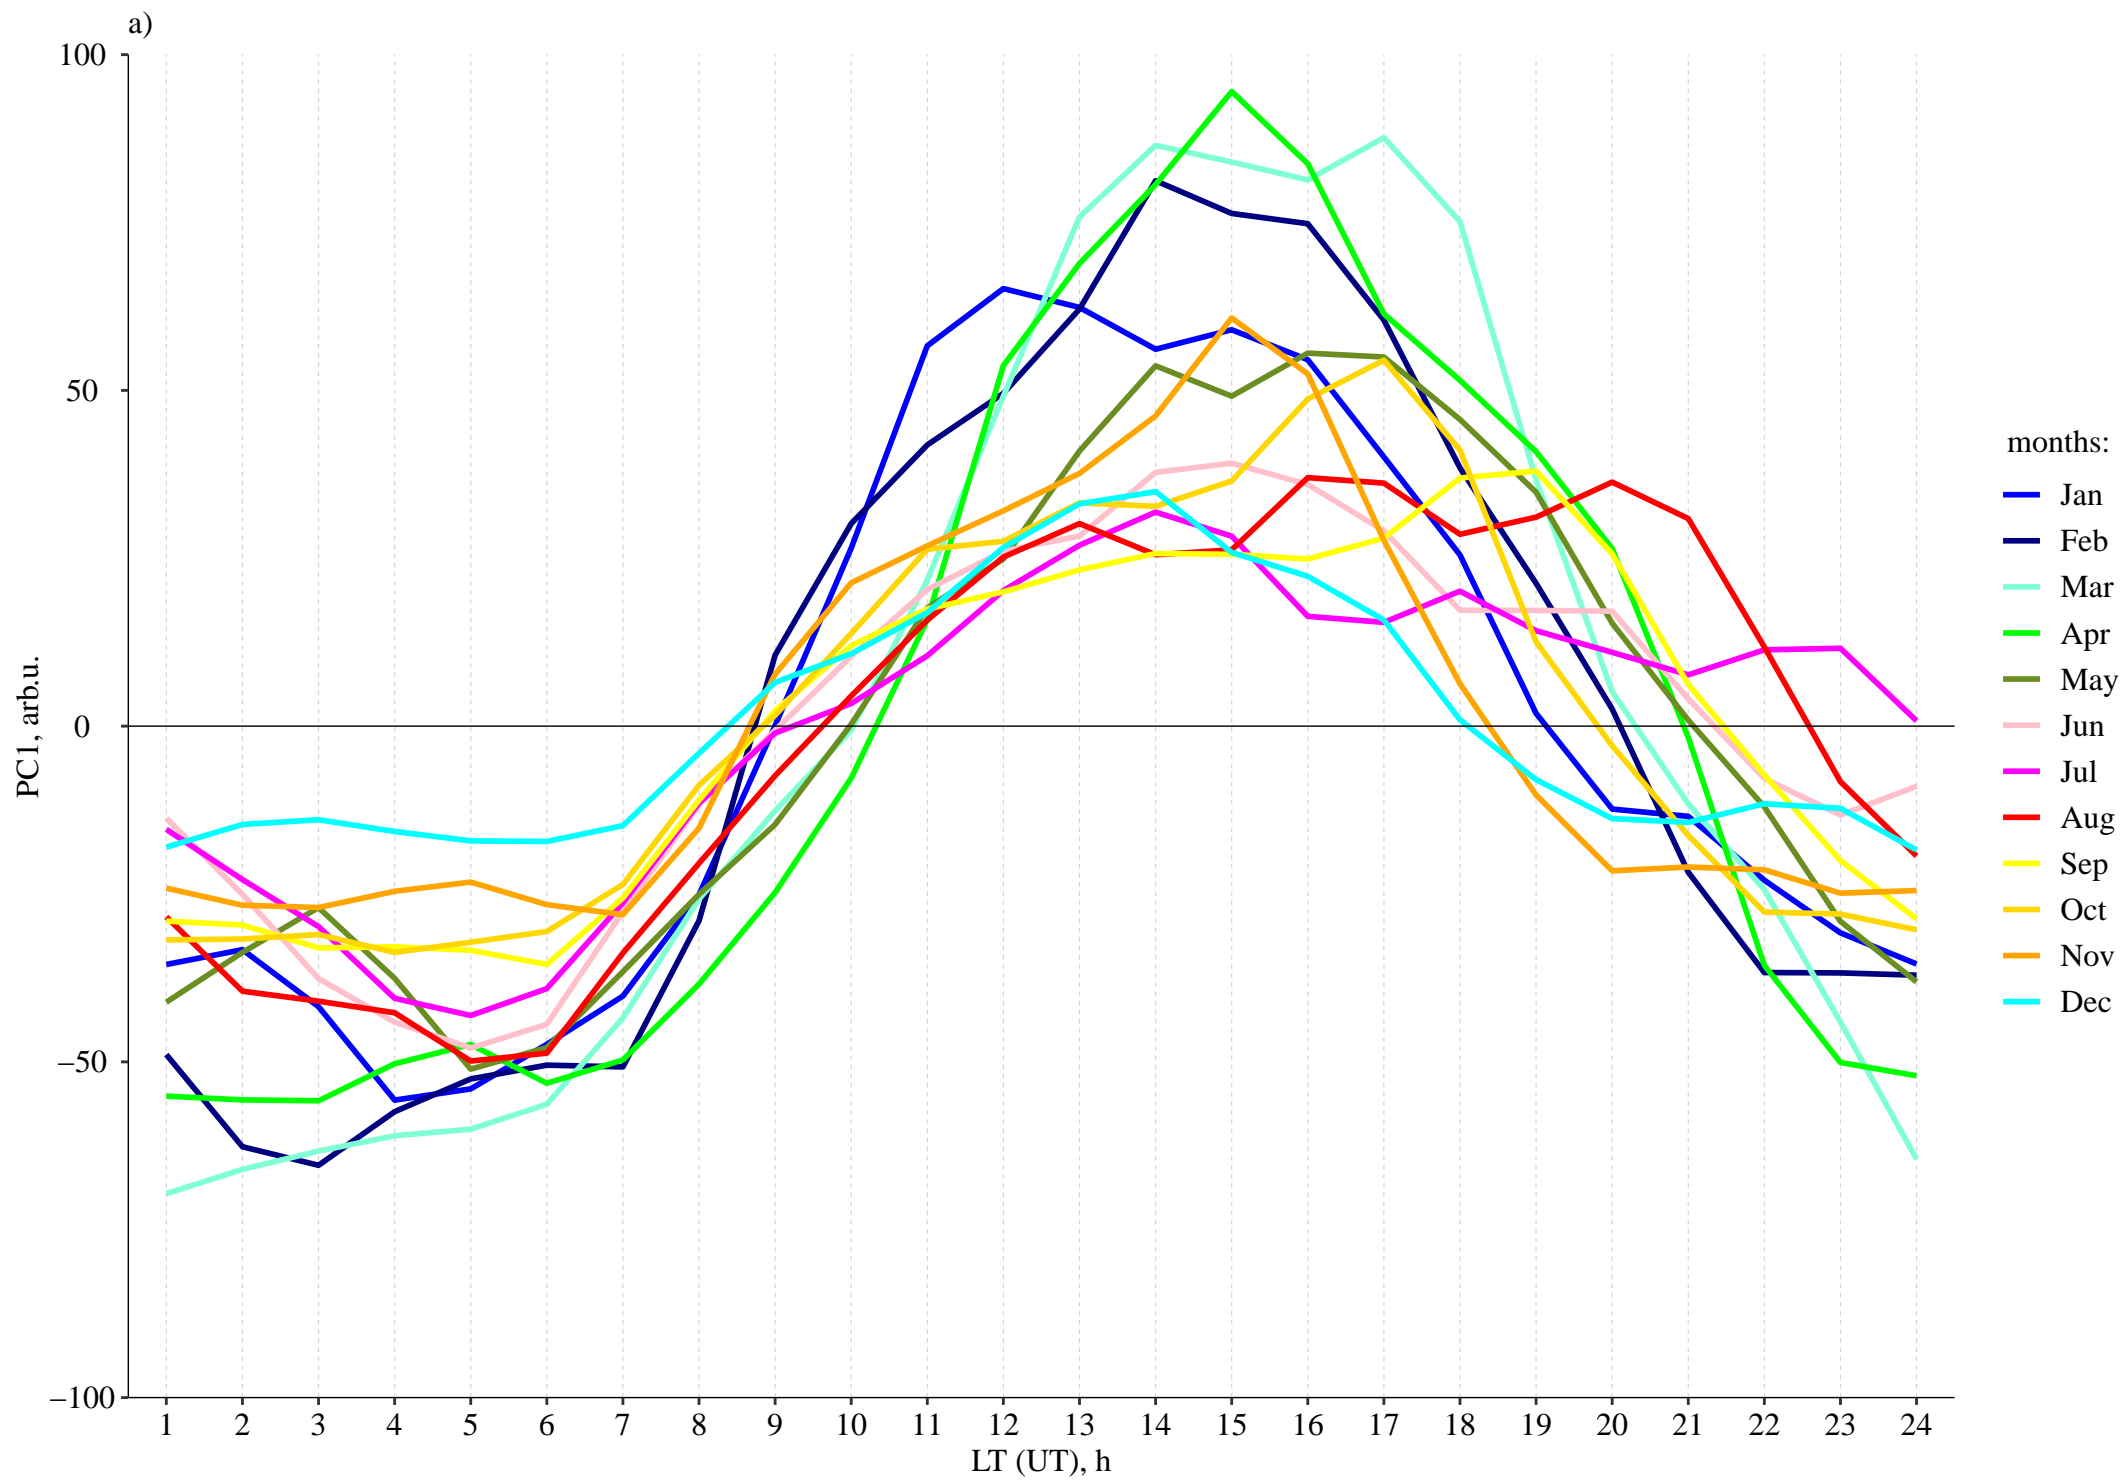

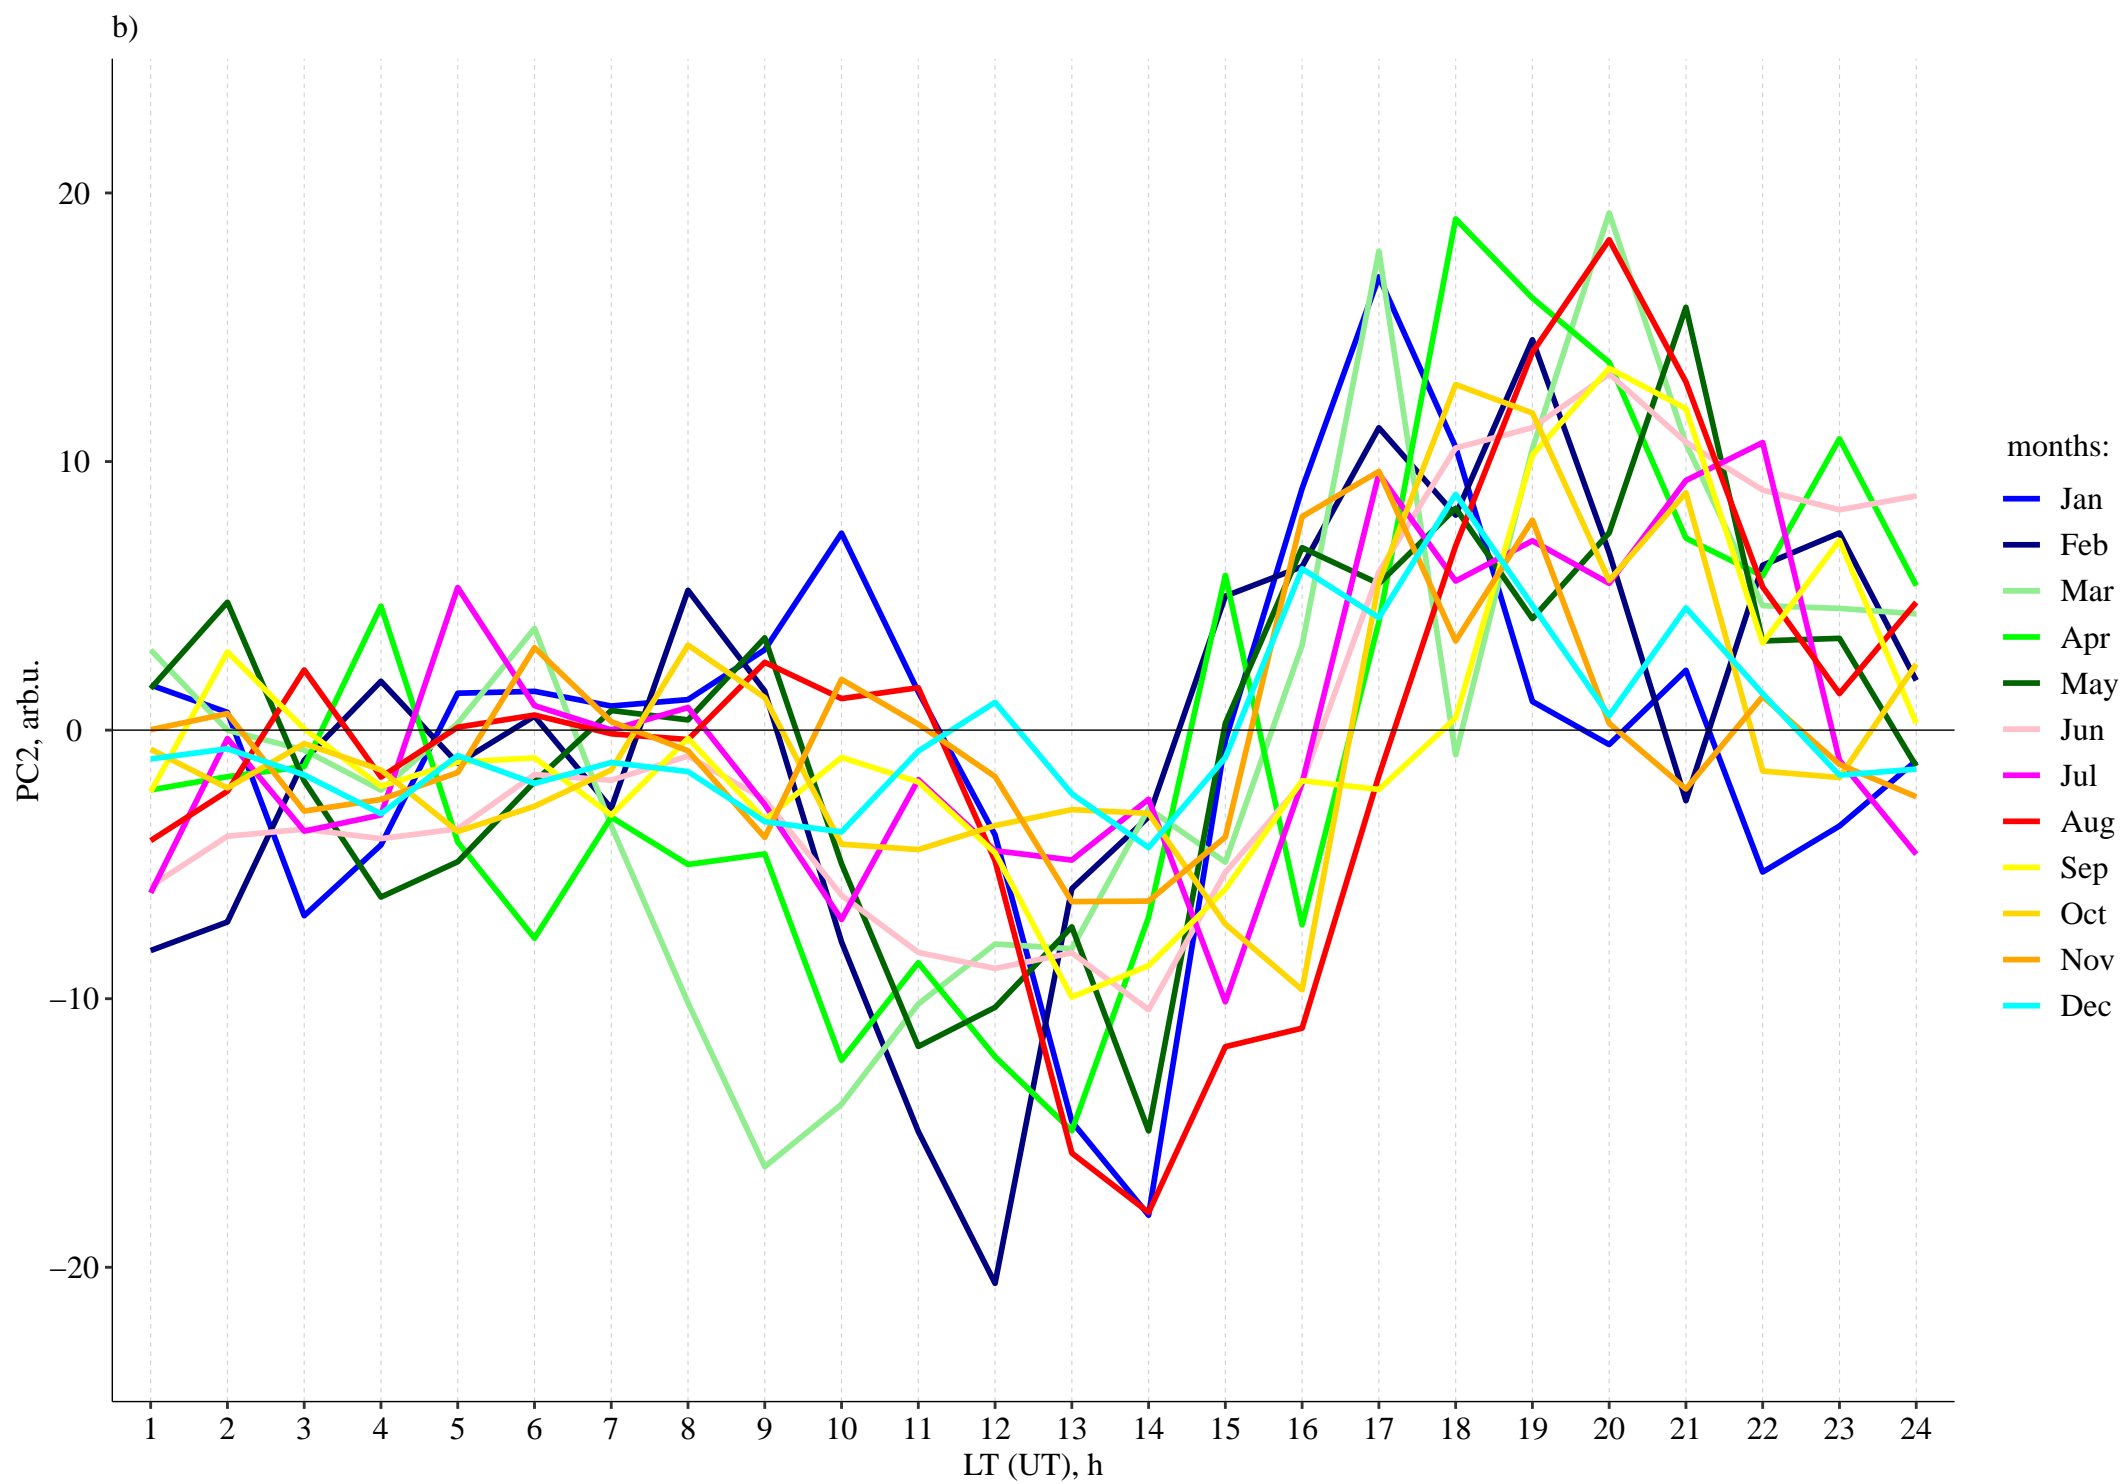

Supplement: s1 [file s1 › PCA-MRM_MDPI-Atmo_SI_Revision2_SeparateFiles_S6_wFigure_v1.pdf]
